# Supplementary material for: On structural factors determining the nature of the fluorescent properties of OIHMs based on 8-hydroxyquinoline
Source: Royal Society of Chemistry journal article supplement (doi:10.1039/d3ce00061c), 2023-01-01
Supplement: d3ce00061c1.pdf [file d3ce00061c1.pdf]

Supplementary Information

**On structural factors determining the nature of the fluorescent  
properties of OIHMs based on 8-hydroxyquinoline**

Marta Bogdan, Tomasz Sierański, Marcin Świątkowski and Agata Trzęsowska-Kruszyńska

*Institute of General and Ecological Chemistry, Lodz University of Technology, Zeromskiego 116, 90924, Lodz,  
Poland*

## Table of content

|                                                                                                                                                                                                          |    |
|----------------------------------------------------------------------------------------------------------------------------------------------------------------------------------------------------------|----|
| 1. Synthesis details .....                                                                                                                                                                               | 3  |
| 2. Supplemental tables .....                                                                                                                                                                             | 7  |
| Table S1. Crystal data and structure refinement details for the studied compounds. ....                                                                                                                  | 7  |
| Table S2. Structural data of the coordination polyhedra in the studied compounds. ....                                                                                                                   | 10 |
| Table S3. Stacking interactions in the studied compounds. ....                                                                                                                                           | 12 |
| Table S4. Hydrogen bond in the studied compounds. ....                                                                                                                                                   | 13 |
| Table S5. Vibrational frequencies ( $\text{cm}^{-1}$ ) and their assignment for the studied compounds. ....                                                                                              | 16 |
| Table S6. The most important electronic transitions for the compounds containing the open-shell coordination centers. ....                                                                               | 19 |
| Table S7. The most important electronic transitions for the chloride compounds containing the closed-shell coordination centers. ....                                                                    | 21 |
| Table S8. The most important electronic transitions for the bromide compounds containing the close-shell coordination centers. ....                                                                      | 24 |
| 3. Supplemental figures .....                                                                                                                                                                            | 27 |
| XRPD pattern (Figure S1) .....                                                                                                                                                                           | 27 |
| Molecular structures and intermolecular interactions (Figure S2-S18) .....                                                                                                                               | 27 |
| UV-Vis spectra (Figure S19-S38) .....                                                                                                                                                                    | 39 |
| Calculated molecular orbitals of the studied compounds, corresponding to Tables S6-S8 (Figure S39-S56)..                                                                                                 | 49 |
| Calculated molecular orbitals involved in the excitation process, corresponding to Table 2 of the main manuscript (Figure S57-S75) .....                                                                 | 78 |
| 3D-EEM fluorescence spectra (Figure S76-S95) .....                                                                                                                                                       | 82 |
| 4. The data concerning the structures of $(8\text{hqBr}_2\text{H})_2[\text{CuBr}_4]\cdot 2\text{H}_2\text{O}$ and $(8\text{hqBr}_2\text{H})_4[\text{Bi}_2\text{Br}_{10}]\cdot 2\text{H}_2\text{O}$ ..... | 92 |

## 1. Synthesis details

### *bis(8-hydroxyquinolinium) tetrachloridomercurate(II) synthesis (HgCl(1))*

The compound was obtained from the filtrate solution which was left after removing crystals of 8-hydroxyquinolinium  $\mu$ -chlorido-dichloridomercurate(II) dihydrate. After two months new yellow crystals grew from this filtrate. Yield: 42%.

### *8-hydroxyquinolinium $\mu$ -chlorido-dichloridomercurate(II) dihydrate synthesis (HgCl(2))*

The 8-hydroxyquinoline powder (1 mmol; 0.1452 g) was dissolved in a 5 ml of methanol. Solid mercury(II) chloride (0.5 mmol; 0.1358 g) was dissolved in 5 ml of 37% HCl. The acidic halide solution was added to 10 ml of water and the solution was stirred for about 10 minutes. To this solution, a methanolic ligand solution was added dropwise. The reaction mixture was stirred for 30 minutes. Immediately yellow crystals grew. A batch of crystals was filtered off and dried in an air atmosphere. Yield: 36%.

### *bis(8-hydroxyquinolinium) tetrabromidomercurate(II) synthesis (HgBr)*

The 8-hydroxyquinoline powder (1.05 mmol; 0.1525 g) was dissolved in a 5 ml of methanol. Solid mercury(II) bromide (0,525 mmol; 0.1892 g) was dissolved in 5 ml of 40% HBr. The acidic halide solution was added to 10 ml of water and the solution was stirred for about 10 minutes. To this solution, a methanolic ligand solution was added dropwise. The reaction mixture was stirred for 30 minutes. The yellow solution was left to crystallize. After three months yellow crystals grew. A batch of crystals was filtered off and dried in an air atmosphere. Yield: 64%.

### *8-hydroxyquinolinium $\mu$ -chlorido-dichloridoleadate(II) synthesis (PbCl)*

The 8-hydroxyquinoline powder (1.02 mmol; 0.1481 g) was dissolved in a 5 ml of methanol. Solid lead(II) chloride (0.51 mmol; 0.1418 g) was dissolved in 10 ml of 37% HCl. To this solution, a methanolic ligand solution was added dropwise. The reaction mixture was stirred for 30 minutes. The yellow solution was left to crystallize. After two days yellow crystals grew. A batch of crystals was filtered off and dried in an air atmosphere. Yield: 74%.

### *8-hydroxyquinolinium $\mu$ -bromido-dibromidoleadate(II) synthesis (PbBr)*

The 8-hydroxyquinoline powder (1.06 mmol; 0.1539 g) was dissolved in a 5 ml of methanol. Solid lead(II) bromide (0,53 mmol; 0.1945 g) was dissolved in 10 ml of 40% HBr. To this solution, a methanolic ligand solution was added dropwise. The reaction mixture was stirred for 30 minutes. Immediately yellow precipitate appeared. The precipitate was filtered off, and the yellow solution was left to crystallize. After two months yellow crystals were obtained. A batch of crystals was filtered off and dried in an air atmosphere. Yield: 69%.

### *bis(8-hydroxyquinolinium) tetrachloridocobaltate(II) synthesis (CoCl)*

The 8-hydroxyquinoline powder (1 mmol; 0.1452 g) was dissolved in a 5 ml of methanol. Solid cobalt(II) chloride hexahydrate (0.5 mmol; 0.1190 g) was dissolved in 5 ml of 37% HCl. The acidic halide solution was added to 9.5

ml of water and the solution was stirred for about 10 minutes. To this solution, a methanolic ligand solution was added dropwise. The reaction mixture was stirred for 30 minutes. The green solution was left to crystallize. After three months green crystals were obtained. A batch of crystals was filtered off and dried in an air atmosphere. Yield: 45%.

*bis(8-hydroxyquinolinium) tetrachloridozincate(II) synthesis (ZnCl)*

The 8-hydroxyquinoline powder (1.05 mmol; 0.1524 g) was dissolved in a 5 ml of methanol. Solid zinc(II) chloride (0.525 mmol; 0.0716 g) was dissolved in 5 ml of 37% HCl. The acidic halide solution was added to 10 ml of water and the solution was stirred for about 10 minutes. To this solution, a methanolic ligand solution was added dropwise. The reaction mixture was stirred for 30 minutes. The yellow solution was left to crystallize. After one-month yellow crystals were obtained. A batch of crystals was filtered off and dried in an air atmosphere. Yield: 62%.

*bis(8-hydroxyquinolinium) tetrabromidocobaltate(II) synthesis (CoBr)*

The 8-hydroxyquinoline powder (1.01 mmol; 0.1466 g) was dissolved in a 5 ml of methanol. Solid cobalt(II) bromide (0.505 mmol; 0.1104 g) was dissolved in 5 ml of 40% HBr. The acidic halide solution was added to 10 ml of water and the solution was stirred for about 10 minutes. To this solution, a methanolic ligand solution was added dropwise. The reaction mixture was stirred for 30 minutes. The orange solution was left to crystallize. After five months orange crystals were obtained. A batch of crystals was filtered off and dried in an air atmosphere. Yield: 43%.

*bis(8-hydroxyquinolinium) tetrabromidozincate(II) synthesis (ZnBr)*

The 8-hydroxyquinoline powder (1.012 mmol; 0.1469 g) was dissolved in a 5 ml of methanol. Solid zinc(II) bromide (0.506 mmol; 0.1140 g) was dissolved in 5 ml of 40% HBr. The acidic halide solution was added to 10 ml of water and the solution was stirred for about 10 minutes. To this solution, a methanolic ligand solution was added dropwise. The reaction mixture was stirred for 30 minutes. The yellow solution was left to crystallize. After three months yellow crystals were obtained. A batch of crystals was filtered off and dried in an air atmosphere. Yield: 54%.

*bis(8-hydroxyquinolinium) tetrabromidocadmiate(II) synthesis (CdBr)*

The 8-hydroxyquinoline powder (1 mmol; 0.1452 g) was dissolved in a 5 ml of methanol. Solid cadmium(II) bromide (0.5 mmol; 0.1361 g) was dissolved in 5 ml of 40% HBr. The acidic halide solution was added to 10 ml of water and the solution was stirred for about 10 minutes. To this solution, a methanolic ligand solution was added dropwise. The reaction mixture was stirred for 30 minutes. The yellow solution was left to crystallize. After three months yellow crystals were obtained. A batch of crystals was filtered off and dried in an air atmosphere. Yield: 56%



*bis(8-hydroxyquinolinium) tetrachloridocadmiate(II) synthesis (CdCl)*

The 8-hydroxyquinoline powder (1.04 mmol; 0.1510 g) was dissolved in a 5 ml of methanol. Solid cadmium(II) chloride (0.520 mmol; 0.095 g) was dissolved in 5 ml of 37% HCl. The acidic halide solution was added to 10 ml of water and the solution was stirred for about 10 minutes. To this solution, a methanolic ligand solution was added dropwise. The reaction mixture was stirred for 30 minutes. The yellow solution was left to crystallize. After one-month yellow crystals were obtained. A batch of crystals was filtered off and dried in an air atmosphere. Yield: 57%

*bis(8-hydroxyquinolinium) tetrachloridoferrate(III) chloride (FeCl)*

The 8-hydroxyquinoline powder (1.07 mmol; 0.1553 g) was dissolved in a 5 ml of methanol. Solid iron(III) chloride hexahydrate (0.535 mmol; 0.1446 g) was dissolved in 5 ml of 37% HCl. The acidic halide solution was added to 10 ml of water and the solution was stirred for about 10 minutes. To this solution, a methanolic ligand solution was added dropwise. The reaction mixture was stirred for 30 minutes. The yellow solution was left to crystallize. After two weeks yellow crystals were obtained. A batch of crystals was filtered off and dried in an air atmosphere. Yield: 66%.

*bis(8-hydroxyquinolinium) tetrabromidoferrate(III) bromide (FeBr)*

The 8-hydroxyquinoline powder (1.05 mmol; 0.1525 g) was dissolved in a 5 ml of methanol. Solid iron(III) bromide (0,525 mmol; 0.1552 g) was dissolved in 5 ml of 40% HBr. The acidic halide solution was added to 10 ml of water and the solution was stirred for about 10 minutes. To this solution, a methanolic ligand solution was added dropwise. The reaction mixture was stirred for 30 minutes. Immediately red-brown precipitate appeared. The precipitate was filtered off, and the red solution was left to crystallize. After six weeks red crystals were obtained. A batch of crystals was filtered off and dried in an air atmosphere. Yield: 51%.

*bis(8-hydroxyquinolinium) tetrachloridocopperate(II) (CuCl)*

The 8-hydroxyquinoline powder (1.06 mmol; 0.1539 g) was dissolved in a 5 ml of methanol. Solid copper(II) chloride dihydrate (0.530 mmol; 0.0903 g) was dissolved in 5 ml of 37% HCl. The acidic halide solution was added to 10 ml of water and the solution was stirred for about 10 minutes. To this solution, a methanolic ligand solution was added dropwise. The reaction mixture was stirred for 30 minutes. The green-yellow solution was left to crystallize. After two months green-yellow crystals were obtained. A batch of crystals was filtered off and dried in an air atmosphere. Yield: 60%.

*tetrakis(8-hydroxyquinolinium)heksachloridobismuthate(III) chloride dihydrate (BiCl)*

The 8-hydroxyquinoline powder (1.03 mmol; 0.1488 g) was dissolved in a 5 ml of methanol. Solid bismuth(III) chloride (0.513 mmol; 0.1618 g) was dissolved in 5 ml of 37% HCl. To this solution, a methanolic ligand solution was added dropwise. The reaction mixture was stirred for 30 minutes. The yellow solution was left to crystallize.

After one-month yellow crystals were obtained. A batch of crystals was filtered off and dried in an air atmosphere. Yield: 53%.

*8-hydroxyquinolinium chloride (8hqHCl)*

The 8-hydroxyquinoline powder (1.2 mmol; 0.1742 g) was dissolved in a 5 ml of methanol. To this solution, 5 ml of 37% hydrochloric acid was added dropwise. The reaction mixture was stirred for 30 minutes. The yellow solution was left to crystallize. After one-month transparent, yellow crystals were obtained. A batch of crystals was filtered off and dried in an air atmosphere. Yield: 72%.

*8-hydroxyquinolinium bromide (8hqHBr)*

The 8-hydroxyquinoline powder (1.1 mmol; 0.1597 g) was dissolved in a 5 ml of methanol. To this solution, 5 ml of 40% hydrobromic acid was added dropwise. The reaction mixture was stirred for 30 minutes. The yellow solution was left to crystallize. After three months yellow crystals were obtained. A batch of crystals was filtered off and dried in an air atmosphere. Yield: 66%.

*bis(8-hydroxyquinolinium)heksachloridotinnate(IV) dihydrate (SnCl(1))*

The compound was obtained from the filtrate solution which was left after removing crystals of *8-hydroxyquinolinium tetrachlorido-(quinolin-8-olato- $\kappa^2$ -N, O) tinnate(IV) hydrate*. After one month new yellow crystals grew from this filtrate. Yield: 32%.

*8-hydroxyquinolinium tetrachlorido-(quinolin-8-olato- $\kappa^2$ -N, O) tinnate(IV) hydrate (SnCl(2))*

The 8-hydroxyquinoline powder (1.02 mmol; 0.1481 g) was dissolved in a 5 ml of methanol. Liquid, anhydrous tin(IV) chloride (0.510 mmol; 0.1329 g) was dissolved in 5 ml of 37% HCl. To this solution, a methanolic ligand solution was added dropwise. The reaction mixture was stirred for 30 minutes. Immediately after mixing, yellow crystals grew. A batch of crystals was filtered off and dried in an air atmosphere. Yield: 46%.

*bis(8-hydroxyquinolinium)heksabromidotinnate(IV) dihydrate (SnBr)*

The 8-hydroxyquinoline powder (1.12 mmol; 0.1626 g) was dissolved in a 5 ml of methanol. Solid tin(IV) bromide (0.560 mmol; 0.2455 g) was dissolved in 8 ml of 40% HBr. To this solution, a methanolic ligand solution was added dropwise. The reaction mixture was stirred for 30 minutes. The yellow solution was left to crystallize. After one month yellow crystals were obtained. A batch of crystals was filtered off and dried in an air atmosphere. Yield: 67%.

## 2. Supplemental tables

Table S1. Crystal data and structure refinement details for the studied compounds.

| Compound                                                      | FeCl                                                                             | FerBr                                                                            | CoCl                                                                             | CoBr                                                                             | CuCl                                                                             | ZnCl                                                                             | CdCl                                                                             |
|---------------------------------------------------------------|----------------------------------------------------------------------------------|----------------------------------------------------------------------------------|----------------------------------------------------------------------------------|----------------------------------------------------------------------------------|----------------------------------------------------------------------------------|----------------------------------------------------------------------------------|----------------------------------------------------------------------------------|
| Empirical formula                                             | C <sub>18</sub> H <sub>16</sub> Cl <sub>5</sub> N <sub>2</sub> O <sub>2</sub> Fe | C <sub>18</sub> H <sub>16</sub> Br <sub>5</sub> N <sub>2</sub> O <sub>2</sub> Fe | C <sub>18</sub> H <sub>16</sub> Cl <sub>4</sub> N <sub>2</sub> O <sub>2</sub> Co | C <sub>18</sub> H <sub>16</sub> Br <sub>4</sub> N <sub>2</sub> O <sub>2</sub> Co | C <sub>18</sub> H <sub>16</sub> Cl <sub>4</sub> N <sub>2</sub> O <sub>2</sub> Cu | C <sub>18</sub> H <sub>16</sub> Cl <sub>4</sub> N <sub>2</sub> O <sub>2</sub> Zn | C <sub>18</sub> H <sub>16</sub> Cl <sub>4</sub> N <sub>2</sub> O <sub>2</sub> Cd |
| Formula weight                                                | 525.43                                                                           | 747.73                                                                           | 493.06                                                                           | 670.90                                                                           | 497.67                                                                           | 499.50                                                                           | 546.53                                                                           |
| Crystal system                                                | Triclinic                                                                        | Triclinic                                                                        | Monoclinic                                                                       | Monoclinic                                                                       | Triclinic                                                                        | Monoclinic                                                                       | Monoclinic                                                                       |
| Space group                                                   | <i>P</i> -1                                                                      | <i>P</i> -1                                                                      | <i>C</i> 2/ <i>c</i>                                                             | <i>P</i> 2/ <i>n</i>                                                             | <i>P</i> -1                                                                      | <i>C</i> 2/ <i>c</i>                                                             | <i>C</i> 2/ <i>c</i>                                                             |
| Radiation                                                     | Mo <i>K</i> α (0.71073 Å)                                                        | Cu <i>K</i> α (1.54184 Å)                                                        | Cu <i>K</i> α (1.54184 Å)                                                        | Mo <i>K</i> α (0.71073 Å)                                                        |
| Unit cell dimensions                                          |                                                                                  |                                                                                  |                                                                                  |                                                                                  |                                                                                  |                                                                                  |                                                                                  |
| <i>a</i> (Å)                                                  | 7.4707(2)                                                                        | 7.68190(10)                                                                      | 15.2078(7)                                                                       | 17.0128(6)                                                                       | 9.54840(10)                                                                      | 15.1939(2)                                                                       | 15.2834(6)                                                                       |
| <i>b</i> (Å)                                                  | 10.1801(2)                                                                       | 10.4227(2)                                                                       | 8.0042(4)                                                                        | 7.1435(2)                                                                        | 10.74010(10)                                                                     | 7.99590(10)                                                                      | 8.2421(4)                                                                        |
| <i>c</i> (Å)                                                  | 14.1377(4)                                                                       | 14.4180(3)                                                                       | 16.6991(8)                                                                       | 17.1911(7)                                                                       | 10.78680(10)                                                                     | 16.6547(2)                                                                       | 16.5244(7)                                                                       |
| <i>α</i> (°)                                                  | 86.275(2)                                                                        | 86.456(2)                                                                        | 90.00                                                                            | 90.00                                                                            | 98.6680(10)                                                                      | 90.00                                                                            | 90                                                                               |
| <i>β</i> (°)                                                  | 86.472(2)                                                                        | 85.113(2)                                                                        | 91.133(4)                                                                        | 90.158(3)                                                                        | 113.4250(10)                                                                     | 91.0690(10)                                                                      | 91.322(4)                                                                        |
| <i>γ</i> (°)                                                  | 84.890(2)                                                                        | 85.066(2)                                                                        | 90.00                                                                            | 90.00                                                                            | 99.3670(10)                                                                      | 90.00                                                                            | 90                                                                               |
| Volume (Å <sup>3</sup> )                                      | 1066.99(5)                                                                       | 1144.21(4)                                                                       | 2032.32(17)                                                                      | 2089.24(13)                                                                      | 972.727(18)                                                                      | 2023.01(4)                                                                       | 2080.98(16)                                                                      |
| <i>Z</i>                                                      | 2                                                                                | 2                                                                                | 4                                                                                | 4                                                                                | 2                                                                                | 4                                                                                | 4                                                                                |
| Calculated density (Mg/m <sup>3</sup> )                       | 1.635                                                                            | 2.170                                                                            | 1.611                                                                            | 2.133                                                                            | 1.699                                                                            | 1.640                                                                            | 1.744                                                                            |
| Absorption coefficient (mm <sup>-1</sup> )                    | 1.350                                                                            | 9.406                                                                            | 1.386                                                                            | 8.488                                                                            | 6.788                                                                            | 6.690                                                                            | 1.579                                                                            |
| <i>F</i> (000)                                                | 530                                                                              | 710                                                                              | 996                                                                              | 1284                                                                             | 502                                                                              | 1008                                                                             | 1080                                                                             |
| Min. and max. transmission                                    | 0.364 and 1.000                                                                  | 0.237 and 0.789                                                                  | 0.943 and 1.000                                                                  | 0.310 and 0.777                                                                  | 0.676 and 0.993                                                                  | 0.653 and 0.887                                                                  | 0.868 and 1.000                                                                  |
| <i>θ</i> Range for data collection (°)                        | 3.622 to 25.020                                                                  | 2.360 to 25.023                                                                  | 3.589 to 25.023                                                                  | 2.851 to 32.202                                                                  | 4.296 to 66.590                                                                  | 5.313 to 66.569                                                                  | 2.666 to 25.024                                                                  |
| Index ranges                                                  | -8 ≤ <i>h</i> ≤ 8<br>-11 ≤ <i>k</i> ≤ 12<br>-16 ≤ <i>l</i> ≤ 16                  | -9 ≤ <i>h</i> ≤ 9<br>-12 ≤ <i>k</i> ≤ 12<br>-17 ≤ <i>l</i> ≤ 17                  | -17 ≤ <i>h</i> ≤ 17<br>-9 ≤ <i>k</i> ≤ 9<br>-19 ≤ <i>l</i> ≤ 19                  | -25 ≤ <i>h</i> ≤ 25<br>-10 ≤ <i>k</i> ≤ 10<br>-25 ≤ <i>l</i> ≤ 25                | -11 ≤ <i>h</i> ≤ 10<br>-12 ≤ <i>k</i> ≤ 12<br>-12 ≤ <i>l</i> ≤ 12                | -18 ≤ <i>h</i> ≤ 17<br>-9 ≤ <i>k</i> ≤ 7<br>-19 ≤ <i>l</i> ≤ 19                  | -18 ≤ <i>h</i> ≤ 18<br>-9 ≤ <i>k</i> ≤ 9<br>-19 ≤ <i>l</i> ≤ 19                  |
| Reflections collected / unique                                | 22440 / 3754                                                                     | 28566 / 4033                                                                     | 8765 / 1784                                                                      | 57774 / 7751                                                                     | 25526 / 3448                                                                     | 9647 / 1790                                                                      | 7746 / 1840                                                                      |
| <i>R</i> <sub>int</sub>                                       | 0.0233                                                                           | 0.0238                                                                           | 0.0354                                                                           | 0.0948                                                                           | 0.0349                                                                           | 0.0261                                                                           | 0.0322                                                                           |
| Completeness (%)                                              | 99.7                                                                             | 99.9                                                                             | 99.3                                                                             | 99.9                                                                             | 100.0                                                                            | 100.0                                                                            | 99.9                                                                             |
| Data / restraints / parameters                                | 3754 / 0 / 255                                                                   | 4033 / 0 / 255                                                                   | 1784 / 0 / 124                                                                   | 7751 / 0 / 248                                                                   | 3448 / 0 / 246                                                                   | 1790 / 0 / 124                                                                   | 1840 / 0 / 124                                                                   |
| Goodness-of-fit on <i>F</i> <sup>2</sup>                      | 1.069                                                                            | 1.041                                                                            | 1.040                                                                            | 1.097                                                                            | 1.044                                                                            | 1.085                                                                            | 1.031                                                                            |
| Final <i>R</i> indices [ <i>I</i> > 2σ( <i>I</i> )]           | <i>R</i> 1 = 0.0247<br><i>wR</i> 2 = 0.0627                                      | <i>R</i> 1 = 0.0159<br><i>wR</i> 2 = 0.0381                                      | <i>R</i> 1 = 0.0241<br><i>wR</i> 2 = 0.0557                                      | <i>R</i> 1 = 0.0805<br><i>wR</i> 2 = 0.2159                                      | <i>R</i> 1 = 0.0258<br><i>wR</i> 2 = 0.0681                                      | <i>R</i> 1 = 0.0197<br><i>wR</i> 2 = 0.0536                                      | <i>R</i> 1 = 0.0184,<br><i>wR</i> 2 = 0.0397                                     |
| <i>R</i> indices (all data)                                   | <i>R</i> 1 = 0.0253<br><i>wR</i> 2 = 0.0630                                      | <i>R</i> 1 = 0.0175,<br><i>wR</i> 2 = 0.0386                                     | <i>R</i> 1 = 0.0309<br><i>wR</i> 2 = 0.0580                                      | <i>R</i> 1 = 0.1064,<br><i>wR</i> 2 = 0.2344                                     | <i>R</i> 1 = 0.0297<br><i>wR</i> 2 = 0.0701                                      | <i>R</i> 1 = 0.0208,<br><i>wR</i> 2 = 0.0542                                     | <i>R</i> 1 = 0.0231,<br><i>wR</i> 2 = 0.0410                                     |
| Largest diff. peak and hole (e <sup>-</sup> Å <sup>-3</sup> ) | 1.329 and -0.566                                                                 | 1.660 and -0.240                                                                 | 0.425 and -0.209                                                                 | 2.652 and -2.208                                                                 | 0.938 and -0.404                                                                 | 0.261 and -0.325                                                                 | 0.300 and -0.322                                                                 |

Table S1. *continued*

| Compound                                                     | CdBr                                                                             | HgCl(1)                                                                          | HgCl(2)                                                                         | HgBr                                                                             | SnCl(1)                                                                          | SnCl(2)                                                                          | SnBr                                                                             |
|--------------------------------------------------------------|----------------------------------------------------------------------------------|----------------------------------------------------------------------------------|---------------------------------------------------------------------------------|----------------------------------------------------------------------------------|----------------------------------------------------------------------------------|----------------------------------------------------------------------------------|----------------------------------------------------------------------------------|
| Empirical formula                                            | C <sub>18</sub> H <sub>16</sub> Br <sub>4</sub> N <sub>2</sub> O <sub>2</sub> Cd | C <sub>18</sub> H <sub>16</sub> Cl <sub>4</sub> N <sub>2</sub> O <sub>2</sub> Hg | C <sub>9</sub> H <sub>12</sub> Cl <sub>3</sub> N <sub>1</sub> O <sub>3</sub> Hg | C <sub>18</sub> H <sub>16</sub> Br <sub>4</sub> N <sub>2</sub> O <sub>2</sub> Hg | C <sub>18</sub> H <sub>20</sub> Cl <sub>6</sub> N <sub>2</sub> O <sub>4</sub> Sn | C <sub>18</sub> H <sub>16</sub> Cl <sub>4</sub> N <sub>2</sub> O <sub>3</sub> Sn | C <sub>18</sub> H <sub>16</sub> Br <sub>6</sub> N <sub>2</sub> O <sub>4</sub> Sn |
| Formula weight                                               | 724.37                                                                           | 634.72                                                                           | 489.14                                                                          | 812.56                                                                           | 659.75                                                                           | 568.82                                                                           | 926.51                                                                           |
| Crystal system                                               | Monoclinic                                                                       | Monoclinic                                                                       | Monoclinic                                                                      | Monoclinic                                                                       | Triclinic                                                                        | Orthorhombic                                                                     | Triclinic                                                                        |
| Space group                                                  | <i>C2/c</i>                                                                      | <i>C2/c</i>                                                                      | <i>P2<sub>1</sub>/n</i>                                                         | <i>P2<sub>1</sub>/n</i>                                                          | <i>P-1</i>                                                                       | <i>Pbca</i>                                                                      | <i>P-1</i>                                                                       |
| Radiation                                                    | Mo K $\alpha$ (0.71073 Å)                                                        | Mo K $\alpha$ (0.71073 Å)                                                        | Mo K $\alpha$ (0.71073 Å)                                                       | Mo K $\alpha$ (0.71073 Å)                                                        | Mo K $\alpha$ (0.71073 Å)                                                        | Mo K $\alpha$ (0.71073 Å)                                                        | Mo K $\alpha$ (0.71073 Å)                                                        |
| Unit cell dimensions                                         |                                                                                  |                                                                                  |                                                                                 |                                                                                  |                                                                                  |                                                                                  |                                                                                  |
| <i>a</i> (Å)                                                 | 15.7785(6)                                                                       | 15.2852(2)                                                                       | 13.7376(4)                                                                      | 17.0829(8)                                                                       | 7.2163(3)                                                                        | 7.8652(4)                                                                        | 7.4143(3)                                                                        |
| <i>b</i> (Å)                                                 | 8.5996(3)                                                                        | 8.25560(10)                                                                      | 4.3663(2)                                                                       | 7.2297(3)                                                                        | 9.5228(4)                                                                        | 16.7617(7)                                                                       | 9.8360(4)                                                                        |
| <i>c</i> (Å)                                                 | 16.6373(7)                                                                       | 16.5412(2)                                                                       | 22.5270(8)                                                                      | 17.2934(8)                                                                       | 9.5411(4)                                                                        | 31.4221(15)                                                                      | 9.5667(3)                                                                        |
| $\alpha$ (°)                                                 | 90.00                                                                            | 90.00                                                                            | 90.00                                                                           | 90.00                                                                            | 83.177(3)                                                                        | 90.00                                                                            | 83.836(3)                                                                        |
| $\beta$ (°)                                                  | 92.280(4)                                                                        | 91.3170(10)                                                                      | 95.846(3)                                                                       | 90.388(4)                                                                        | 71.049(4)                                                                        | 90.00                                                                            | 72.170(3)                                                                        |
| $\gamma$ (°)                                                 | 90.00                                                                            | 90.00                                                                            | 90.00                                                                           | 90.00                                                                            | 79.945(3)                                                                        | 90.00                                                                            | 79.668(4)                                                                        |
| Volume (Å <sup>3</sup> )                                     | 2255.71(15)                                                                      | 2086.76(4)                                                                       | 1344.20(9)                                                                      | 2135.76(17)                                                                      | 609.24(5)                                                                        | 4142.5(3)                                                                        | 652.37(4)                                                                        |
| Z                                                            | 4                                                                                | 4                                                                                | 4                                                                               | 4                                                                                | 1                                                                                | 8                                                                                | 1                                                                                |
| Calculated density (Mg/m <sup>3</sup> )                      | 2.133                                                                            | 2.020                                                                            | 2.417                                                                           | 2.527                                                                            | 1.798                                                                            | 1.824                                                                            | 2.358                                                                            |
| Absorption coefficient (mm <sup>-1</sup> )                   | 8.069                                                                            | 7.904                                                                            | 12.009                                                                          | 14.706                                                                           | 1.734                                                                            | 1.772                                                                            | 10.193                                                                           |
| <i>F</i> (000)                                               | 1368                                                                             | 1208                                                                             | 912                                                                             | 1496                                                                             | 326                                                                              | 2240                                                                             | 434                                                                              |
| Min. and max. transmission                                   | 0.710 to 1.000                                                                   | 0.316 and 0.948                                                                  | 0.041 and 0.798                                                                 | 0.462 and 0.706                                                                  | 0.817 and 0.966                                                                  | 0.684 and 1.000                                                                  | 0.164 and 1.000                                                                  |
| $\theta$ Range for data collection (°)                       | 3.611 to 25.021                                                                  | 3.589 to 25.019                                                                  | 3.637 to 25.011                                                                 | 3.674 to 25.027                                                                  | 3.455 to 25.008                                                                  | 3.555 to 25.025                                                                  | 2.921 to 25.028                                                                  |
| Index ranges                                                 | -18 ≤ <i>h</i> ≤ 18<br>-10 ≤ <i>k</i> ≤ 10<br>-19 ≤ <i>l</i> ≤ 19                | -18 ≤ <i>h</i> ≤ 18<br>-9 ≤ <i>k</i> ≤ 9<br>-19 ≤ <i>l</i> ≤ 19                  | -16 ≤ <i>h</i> ≤ 16<br>-5 ≤ <i>k</i> ≤ 5<br>-26 ≤ <i>l</i> ≤ 26                 | -20 ≤ <i>h</i> ≤ 20<br>-8 ≤ <i>k</i> ≤ 8<br>-20 ≤ <i>l</i> ≤ 20                  | -8 ≤ <i>h</i> ≤ 8<br>-11 ≤ <i>k</i> ≤ 11<br>-11 ≤ <i>l</i> ≤ 11                  | -8 ≤ <i>h</i> ≤ 9<br>-19 ≤ <i>k</i> ≤ 18<br>-37 ≤ <i>l</i> ≤ 37                  | -8 ≤ <i>h</i> ≤ 8<br>-11 ≤ <i>k</i> ≤ 11<br>-11 ≤ <i>l</i> ≤ 11                  |
| Reflections collected / unique                               | 8130 / 1988                                                                      | 31143 / 1842                                                                     | 14421 / 2373                                                                    | 12595 / 3745                                                                     | 31869 / 4468                                                                     | 23321 / 3651                                                                     | 16086 / 2299                                                                     |
| <i>R</i> <sub>int</sub>                                      | 0.0296                                                                           | 0.0288                                                                           | 0.0330                                                                          | 0.0531                                                                           | 0.0517                                                                           | 0.0296                                                                           | 0.0401                                                                           |
| Completeness (%)                                             | 99.7                                                                             | 99.7                                                                             | 99.7                                                                            | 99.0                                                                             | 99.7                                                                             | 99.7                                                                             | 99.9                                                                             |
| Data / restraints / parameters                               | 1988 / 0 / 124                                                                   | 1842 / 0 / 124                                                                   | 2373 / 0 / 155                                                                  | 3745 / 0 / 247                                                                   | 4468 / 0 / 144                                                                   | 3651 / 0 / 254                                                                   | 2299 / 0 / 143                                                                   |
| Goodness-of-fit on <i>F</i> <sup>2</sup>                     | 1.029                                                                            | 1.120                                                                            | 1.046                                                                           | 1.037                                                                            | 1.108                                                                            | 1.043                                                                            | 1.067                                                                            |
| Final <i>R</i> indices [ <i>I</i> > 2 $\sigma$ ( <i>I</i> )] | <i>R</i> 1 = 0.0173<br><i>wR</i> 2 = 0.0381                                      | <i>R</i> 1 = 0.0082<br><i>wR</i> 2 = 0.0215                                      | <i>R</i> 1 = 0.0144<br><i>wR</i> 2 = 0.0338                                     | <i>R</i> 1 = 0.0359,<br><i>wR</i> 2 = 0.0858                                     | <i>R</i> 1 = 0.0393<br><i>wR</i> 2 = 0.1162                                      | <i>R</i> 1 = 0.0197<br><i>wR</i> 2 = 0.0403                                      | <i>R</i> 1 = 0.0161,<br><i>wR</i> 2 = 0.0408                                     |
| <i>R</i> indices (all data)                                  | <i>R</i> 1 = 0.0225,<br><i>wR</i> 2 = 0.0394                                     | <i>R</i> 1 = 0.0082<br><i>wR</i> 2 = 0.0215                                      | <i>R</i> 1 = 0.0159<br><i>wR</i> 2 = 0.0342                                     | <i>R</i> 1 = 0.0456,<br><i>wR</i> 2 = 0.0898                                     | <i>R</i> 1 = 0.0433,<br><i>wR</i> 2 = 0.1179                                     | <i>R</i> 1 = 0.0226,<br><i>wR</i> 2 = 0.0411                                     | <i>R</i> 1 = 0.0176,<br><i>wR</i> 2 = 0.0414                                     |
| Largest diff. peak and hole (e·Å <sup>-3</sup> )             | 0.619 and -0.418                                                                 | 0.319 and -0.169                                                                 | 0.637 and -0.724                                                                | 2.752 and -2.026                                                                 | 1.217 and -0.694                                                                 | 0.308 and -0.306                                                                 | 0.537 and -0.442                                                                 |

Table S1. *continued*

| Compound                                                      | PbCl                                                                           | PbBr                                                                           | BiCl                                                                             | 8hqHCl                                                                       | 8hqHBr                                                                       |
|---------------------------------------------------------------|--------------------------------------------------------------------------------|--------------------------------------------------------------------------------|----------------------------------------------------------------------------------|------------------------------------------------------------------------------|------------------------------------------------------------------------------|
| Empirical formula                                             | C <sub>9</sub> H <sub>8</sub> Cl <sub>3</sub> N <sub>1</sub> O <sub>1</sub> Pb | C <sub>9</sub> H <sub>8</sub> Br <sub>3</sub> N <sub>1</sub> O <sub>1</sub> Pb | C <sub>36</sub> H <sub>36</sub> Cl <sub>7</sub> N <sub>4</sub> O <sub>6</sub> Bi | C <sub>9</sub> H <sub>10</sub> Cl <sub>1</sub> N <sub>1</sub> O <sub>2</sub> | C <sub>9</sub> H <sub>10</sub> Br <sub>1</sub> N <sub>1</sub> O <sub>2</sub> |
| Formula weight                                                | 459.70                                                                         | 593.08                                                                         | 1077.82                                                                          | 199.63                                                                       | 244.09                                                                       |
| Crystal system                                                | Monoclinic                                                                     | Monoclinic                                                                     | Triclinic                                                                        | Monoclinic                                                                   | Monoclinic                                                                   |
| Space group                                                   | <i>P</i> 2 <sub>1</sub> / <i>n</i>                                             | <i>P</i> 2 <sub>1</sub> / <i>n</i>                                             | <i>P</i> -1                                                                      | <i>P</i> 2 <sub>1</sub> / <i>c</i>                                           | <i>P</i> 2 <sub>1</sub> / <i>c</i>                                           |
| Radiation                                                     | Mo K $\alpha$ (0.71073 Å)                                                      | Mo K $\alpha$ (0.71073 Å)                                                      | Mo K $\alpha$ (0.71073 Å)                                                        | Mo K $\alpha$ (0.71073 Å)                                                    | Cu K $\alpha$ (1.54184 Å)                                                    |
| Unit cell dimensions                                          |                                                                                |                                                                                |                                                                                  |                                                                              |                                                                              |
| <i>a</i> (Å)                                                  | 3.9550(2)                                                                      | 4.06310(10)                                                                    | 8.35930(10)                                                                      | 7.7734(4)                                                                    | 7.72230(10)                                                                  |
| <i>b</i> (Å)                                                  | 20.7707(7)                                                                     | 21.2351(7)                                                                     | 13.0386(2)                                                                       | 8.0302(4)                                                                    | 8.3116(2)                                                                    |
| <i>c</i> (Å)                                                  | 14.0139(5)                                                                     | 14.5111(5)                                                                     | 18.9457(3)                                                                       | 15.1465(8)                                                                   | 15.3112(3)                                                                   |
| $\alpha$ (°)                                                  | 90.00                                                                          | 90.00                                                                          | 76.3850(10)                                                                      | 90                                                                           | 90                                                                           |
| $\beta$ (°)                                                   | 95.449(3)                                                                      | 97.763(4)                                                                      | 83.6190(10)                                                                      | 99.036(5)                                                                    | 101.017(2)                                                                   |
| $\gamma$ (°)                                                  | 90.00                                                                          | 90.00                                                                          | 84.6520(10)                                                                      | 90                                                                           | 90                                                                           |
| Volume (Å <sup>3</sup> )                                      | 1146.01(8)                                                                     | 1240.55(7)                                                                     | 1989.69(5)                                                                       | 933.74(8)                                                                    | 964.63(3)                                                                    |
| Z                                                             | 4                                                                              | 4                                                                              | 2                                                                                | 4                                                                            | 4                                                                            |
| Calculated density (Mg/m <sup>3</sup> )                       | 2.664                                                                          | 3.175                                                                          | 1.799                                                                            | 1.420                                                                        | 1.681                                                                        |
| Absorption coefficient (mm <sup>-1</sup> )                    | 15.391                                                                         | 23.235                                                                         | 4.951                                                                            | 0.374                                                                        | 5.555                                                                        |
| <i>F</i> (000)                                                | 840                                                                            | 1056                                                                           | 1060                                                                             | 416                                                                          | 488                                                                          |
| Min. and max. transmission                                    | 0.094 and 1.000                                                                | 0.149 and 0.947                                                                | 0.379 and 1.000                                                                  | 0.756 and 1.000                                                              | 0.632 and 0.823                                                              |
| $\theta$ Range for data collection (°)                        | 3.285 to 25.027                                                                | 3.422 to 32.025                                                                | 3.463 to 25.026                                                                  | 3.672 to 25.027                                                              | 5.837 to 66.587                                                              |
| Index ranges                                                  | -4 ≤ <i>h</i> ≤ 4<br>-24 ≤ <i>k</i> ≤ 24<br>-16 ≤ <i>l</i> ≤ 16                | -4 ≤ <i>h</i> ≤ 4<br>-24 ≤ <i>k</i> ≤ 25<br>-17 ≤ <i>l</i> ≤ 17                | -9 ≤ <i>h</i> ≤ 9<br>-15 ≤ <i>k</i> ≤ 15<br>-21 ≤ <i>l</i> ≤ 22                  | -9 ≤ <i>h</i> ≤ 9<br>-9 ≤ <i>k</i> ≤ 9<br>-18 ≤ <i>l</i> ≤ 17                | -9 ≤ <i>h</i> ≤ 9<br>-9 ≤ <i>k</i> ≤ 7<br>-14 ≤ <i>l</i> ≤ 18                |
| Reflections collected / unique                                | 12411 / 2025                                                                   | 18634 / 2184                                                                   | 41842 / 7009                                                                     | 9932 / 1649                                                                  | 12671 / 3521                                                                 |
| <i>R</i> <sub>int</sub>                                       | 0.0428                                                                         | 0.0324                                                                         | 0.0287                                                                           | 0.0500                                                                       | 0.0535                                                                       |
| Completeness (%)                                              | 99.8                                                                           | 99.7                                                                           | 99.7                                                                             | 99.8                                                                         | 99.8                                                                         |
| Data / restraints / parameters                                | 2025 / 0 / 137                                                                 | 2184 / 0 / 137                                                                 | 7009 / 0 / 491                                                                   | 1649 / 0 / 119                                                               | 3521 / 0 / 120                                                               |
| Goodness-of-fit on <i>F</i> <sup>2</sup>                      | 1.043                                                                          | 1.038                                                                          | 1.064                                                                            | 1.073                                                                        | 1.114                                                                        |
| Final <i>R</i> indices [ <i>I</i> > 2 $\sigma$ ( <i>I</i> )]  | <i>R</i> 1 = 0.0167<br><i>wR</i> 2 = 0.0388                                    | <i>R</i> 1 = 0.0118,<br><i>wR</i> 2 = 0.0273                                   | <i>R</i> 1 = 0.0132<br><i>wR</i> 2 = 0.0327                                      | <i>R</i> 1 = 0.0557,<br><i>wR</i> 2 = 0.1378                                 | <i>R</i> 1 = 0.0275,<br><i>wR</i> 2 = 0.0904                                 |
| <i>R</i> indices (all data)                                   | <i>R</i> 1 = 0.0200<br><i>wR</i> 2 = 0.0396                                    | <i>R</i> 1 = 0.0135,<br><i>wR</i> 2 = 0.0277                                   | <i>R</i> 1 = 0.0140,<br><i>wR</i> 2 = 0.0328                                     | <i>R</i> 1 = 0.0600,<br><i>wR</i> 2 = 0.1403                                 | <i>R</i> 1 = 0.0292,<br><i>wR</i> 2 = 0.0922                                 |
| Largest diff. peak and hole (e <sup>-</sup> Å <sup>-3</sup> ) | 1.128 and -0.635                                                               | 0.572 and -0.397                                                               | 0.580 and -0.302                                                                 | 1.298 and -0.549                                                             | 0.333 and -0.410                                                             |

Table S2. Structural data of the coordination polyhedra in the studied compounds.

| i—j                   | d <sub>ij</sub> [Å] | i—j—k                                    | a <sub>ijk</sub> [°] | i—j—k                                         | a <sub>ijk</sub> [°] |
|-----------------------|---------------------|------------------------------------------|----------------------|-----------------------------------------------|----------------------|
| <b>FeCl</b>           |                     |                                          |                      |                                               |                      |
| Fe1—Cl1               | 2.1944(5)           | Cl1—Fe1—Cl2                              | 108.30(2)            | Cl2—Fe1—Cl4                                   | 111.09(2)            |
| Fe1—Cl2               | 2.2083(6)           | Cl1—Fe1—Cl3                              | 108.54(2)            | Cl3—Fe1—Cl4                                   | 111.61(2)            |
| Fe1—Cl3               | 2.1990(6)           | Cl1—Fe1—Cl4                              | 108.21(2)            |                                               |                      |
| Fe1—Cl4               | 2.1998(6)           | Cl2—Fe1—Cl3                              | 108.99(2)            |                                               |                      |
| <b>FerBr</b>          |                     |                                          |                      |                                               |                      |
| Fe1—Br1               | 2.3352(4)           | Br1—Fe1—Br2                              | 108.342(14)          | Br2—Fe1—Br4                                   | 110.945(15)          |
| Fe1—Br2               | 2.3484(4)           | Br1—Fe1—Br3                              | 108.276(15)          | Br3—Fe1—Br4                                   | 112.125(15)          |
| Fe1—Br3               | 2.3367(4)           | Br1—Fe1—Br4                              | 107.842(14)          |                                               |                      |
| Fe1—Br4               | 2.3411(4)           | Br2—Fe1—Br3                              | 109.197(15)          |                                               |                      |
| <b>CoCl</b>           |                     |                                          |                      |                                               |                      |
| Co1—Cl1               | 2.2762(5)           | Cl1—Co1—Cl1 <sup>vi</sup>                | 104.65(3)            | Cl2—Co1—Cl1 <sup>i</sup>                      | 112.687(19)          |
| Co1—Cl2               | 2.2868(5)           | Cl1—Co1—Cl2                              | 107.564(18)          | Cl2—Co1—Cl2 <sup>i</sup>                      | 111.56(3)            |
|                       |                     | Cl1—Co1—Cl2 <sup>vi</sup>                | 112.689(19)          | Cl1 <sup>i</sup> —Co1—Cl2 <sup>i</sup>        | 107.562(18)          |
| <b>CoBr</b>           |                     |                                          |                      |                                               |                      |
| Co1—Br1               | 2.4092(16)          | Br1—Co1—Br1 <sup>ii</sup>                | 109.45(10)           | Br11—Co11—Br11 <sup>iii</sup>                 | 106.19(11)           |
| Co1—Br2               | 2.4125(17)          | Br1—Co1—Br2                              | 109.30(4)            | Br11—Co11—Br12                                | 110.69(4)            |
| Co11—Br11             | 2.4206(18)          | Br1—Co1—Br2 <sup>ii</sup>                | 109.16(5)            | Br11—Co11—Br12 <sup>iii</sup>                 | 111.66(4)            |
| Co11—Br12             | 2.4224(18)          | Br2—Co1—Br1 <sup>ii</sup>                | 109.16(5)            | Br12—Co11—Br11 <sup>iii</sup>                 | 111.66(4)            |
|                       |                     | Br2—Co1—Br2 <sup>ii</sup>                | 110.45(10)           | Br12—Co11—Br12 <sup>iii</sup>                 | 106.04(11)           |
|                       |                     | Br1 <sup>ii</sup> —Co1—Br2 <sup>ii</sup> | 109.30(4)            | Br11 <sup>iii</sup> —Co11—Br12 <sup>iii</sup> | 110.69(4)            |
| <b>CuCl</b>           |                     |                                          |                      |                                               |                      |
| Cu1—Cl1               | 2.2574(6)           | Cl1—Cu1—Cl2                              | 93.53(2)             | Cl2—Cu1—Cl4                                   | 146.01(2)            |
| Cu1—Cl2               | 2.2967(6)           | Cl1—Cu1—Cl3                              | 144.77(2)            | Cl3—Cu1—Cl4                                   | 96.74(2)             |
| Cu1—Cl3               | 2.2282(6)           | Cl1—Cu1—Cl4                              | 96.19(2)             |                                               |                      |
| Cu1—Cl4               | 2.2542(6)           | Cl2—Cu1—Cl3                              | 93.77(2)             |                                               |                      |
| <b>ZnCl</b>           |                     |                                          |                      |                                               |                      |
| Zn1—Cl1               | 2.2720(4)           | Cl1—Zn1—Cl1 <sup>vi</sup>                | 104.77(2)            | Cl1—Zn1—Cl2 <sup>i</sup>                      | 112.426(14)          |
| Zn1—Cl2               | 2.2792(4)           | Cl1—Zn1—Cl2                              | 107.893(13)          | Cl2—Zn1—Cl2 <sup>i</sup>                      | 111.31(2)            |
|                       |                     | Cl1—Zn1—Cl2 <sup>vi</sup>                | 112.425(14)          | Cl1 <sup>i</sup> —Zn1—Cl2 <sup>i</sup>        | 107.891(13)          |
| <b>CdCl</b>           |                     |                                          |                      |                                               |                      |
| Cd1—Cl1               | 2.4605(5)           | Cl1—Cd1—Cl1 <sup>vi</sup>                | 102.14(3)            | Cl2—Cd1—Cl1 <sup>i</sup>                      | 114.684(17)          |
| Cd1—Cl2               | 2.4634(5)           | Cl1—Cd1—Cl2                              | 105.716(17)          | Cl2—Cd1—Cl2 <sup>i</sup>                      | 113.56(3)            |
|                       |                     | Cl1—Cd1—Cl2 <sup>vi</sup>                | 114.685(17)          | Cl1 <sup>i</sup> —Cd1—Cl2 <sup>i</sup>        | 105.716(17)          |
| <b>CdBr</b>           |                     |                                          |                      |                                               |                      |
| Cd1—Br1               | 2.5938(3)           | Br1—Co1—Br1 <sup>vi</sup>                | 101.945(16)          | Br2—Cd1—Br1 <sup>i</sup>                      | 115.488(9)           |
| Cd1—Br2               | 2.5937(3)           | Br1—Cd1—Br2                              | 105.806(8)           | Br2—Cd1—Br2 <sup>i</sup>                      | 112.171(15)          |
|                       |                     | Br1—Cd1—Br2 <sup>vi</sup>                | 115.487(9)           | Br1 <sup>i</sup> —Co1—Br2 <sup>i</sup>        | 105.805(8)           |
| <b>HgCl(1)</b>        |                     |                                          |                      |                                               |                      |
| Hg1—Cl1               | 2.4968(4)           | Cl1—Hg1—Cl1 <sup>vi</sup>                | 100.811(17)          | Cl2—Hg1—Cl1 <sup>i</sup>                      | 115.681(12)          |
| Hg1—Cl2               | 2.4844(4)           | Cl1—Hg1—Cl2                              | 105.020(12)          | Cl2—Hg1—Cl2 <sup>i</sup>                      | 114.187(17)          |
|                       |                     | Cl1—Hg1—Cl2 <sup>vi</sup>                | 115.680(12)          | Cl2 <sup>i</sup> —Hg1—Cl1 <sup>i</sup>        | 105.019(12)          |
| <b>HgCl(2)</b>        |                     |                                          |                      |                                               |                      |
| Hg1—Cl1               | 2.3336(7)           | Cl1—Hg1—Cl2                              | 170.10(2)            | Cl2—Hg1—Cl3 <sup>vi</sup>                     | 92.27(2)             |
| Hg1—Cl2               | 2.3600(7)           | Cl1—Hg1—Cl3                              | 96.23(2)             | Cl3—Hg1—Cl2 <sup>iv</sup>                     | 86.99(3)             |
| Hg1—Cl3               | 2.8881(7)           | Cl1—Hg1—Cl2 <sup>iv</sup>                | 90.61(2)             | Cl3—Hg1—Cl2 <sup>v</sup>                      | 171.12(3)            |
| Hg1—Cl2 <sup>iv</sup> | 3.2501(7)           | Cl1—Hg1—Cl2 <sup>v</sup>                 | 88.91(2)             | Cl3—Hg1—Cl3 <sup>vi</sup>                     | 98.24(3)             |
| Hg1—Cl2 <sup>v</sup>  | 3.1702(7)           | Cl1—Hg1—Cl3 <sup>vi</sup>                | 94.34(2)             | Cl2 <sup>iv</sup> —Hg1—Cl2 <sup>v</sup>       | 85.71(5)             |
| Hg1—Cl3 <sup>vi</sup> | 2.8874(7)           | Cl2—Hg1—Cl3                              | 90.10(2)             | Cl2 <sup>iv</sup> —Hg1—Cl3 <sup>vi</sup>      | 172.35(5)            |
|                       |                     | Cl2—Hg1—Cl2 <sup>iv</sup>                | 82.10(2)             | Cl2 <sup>v</sup> —Hg1—Cl3 <sup>vi</sup>       | 88.56(4)             |
|                       |                     | Cl2—Hg1—Cl2 <sup>v</sup>                 | 83.89(3)             |                                               |                      |
| <b>HgBr</b>           |                     |                                          |                      |                                               |                      |
| Hg1—Br1               | 2.6128(7)           | Br1—Hg1—Br1 <sup>ii</sup>                | 109.42(3)            | Br11—Hg11—Br11 <sup>iii</sup>                 | 104.54(4)            |
| Hg1—Br2               | 2.6021(7)           | Br1—Hg1—Br2                              | 109.24(2)            | Br11—Hg11—Br12                                | 111.61(2)            |
| Hg11—Br11             | 2.6203(7)           | Br1—Hg1—Br2 <sup>ii</sup>                | 109.18(2)            | Br11—Hg11—Br12 <sup>iii</sup>                 | 112.00(2)            |
| Hg11—Br12             | 2.6247(8)           | Br2—Hg1—Br1 <sup>ii</sup>                | 109.18(2)            | Br12—Hg11—Br11 <sup>iii</sup>                 | 112.00(2)            |
|                       |                     | Br2—Hg1—Br2 <sup>ii</sup>                | 110.57(4)            | Br12—Hg11—Br12 <sup>iii</sup>                 | 105.26(4)            |
|                       |                     | Br1 <sup>ii</sup> —Hg1—Br2 <sup>ii</sup> | 109.24(2)            | Br11 <sup>iii</sup> —Hg11—Br12 <sup>iii</sup> | 111.60(2)            |
| <b>SnCl(1)</b>        |                     |                                          |                      |                                               |                      |
| Sn1—Cl1               | 2.4404(14)          | Cl1—Sn1—Cl2                              | 90.66(5)             | Cl2—Sn1—Cl3 <sup>xii</sup>                    | 90.10(5)             |
| Sn1—Cl2               | 2.4249(14)          | Cl1—Sn1—Cl3                              | 89.75(5)             | Cl3—Sn1—Cl1 <sup>xii</sup>                    | 90.25(5)             |
| Sn1—Cl3               | 2.4343(14)          | Cl1—Sn1—Cl1 <sup>vii</sup>               | 180.00               | Cl3—Sn1—Cl2 <sup>vii</sup>                    | 90.10(5)             |

| i—j                     | d <sub>ij</sub> [Å] | i—j—k                       | a <sub>ijk</sub> [°] | i—j—k                                        | a <sub>ijk</sub> [°] |
|-------------------------|---------------------|-----------------------------|----------------------|----------------------------------------------|----------------------|
|                         |                     | Cl1—Sn1—Cl2 <sup>vii</sup>  | 89.34(5)             | Cl3—Sn1—Cl3 <sup>vii</sup>                   | 180.00               |
|                         |                     | Cl1—Sn1—Cl3 <sup>vii</sup>  | 90.25(5)             | Cl1 <sup>vii</sup> —Sn1—Cl2 <sup>vii</sup>   | 90.66(5)             |
|                         |                     | Cl2—Sn1—Cl3                 | 89.91(5)             | Cl1 <sup>vii</sup> —Sn1—Cl3 <sup>vii</sup>   | 89.75(5)             |
|                         |                     | Cl2—Sn1—Cl1 <sup>vii</sup>  | 89.35(5)             | Cl2 <sup>vii</sup> —Sn1—Cl3 <sup>vii</sup>   | 89.90(5)             |
|                         |                     | Cl2—Sn1—Cl2 <sup>vii</sup>  | 180.00               |                                              |                      |
| <b>SnCl(2)</b>          |                     |                             |                      |                                              |                      |
| Sn1—N1                  | 2.2058(18)          | N1—Sn1—O1                   | 78.18(6)             | O1—Sn1—Cl4                                   | 93.22(4)             |
| Sn1—O1                  | 2.0942(14)          | N1—Sn1—Cl1                  | 89.70(5)             | Cl1—Sn1—Cl2                                  | 91.98(2)             |
| Sn1—Cl1                 | 2.4233(6)           | N1—Sn1—Cl2                  | 92.17(5)             | Cl1—Sn1—Cl3                                  | 176.035(18)          |
| Sn1—Cl2                 | 2.3895(5)           | N1—Sn1—Cl3                  | 87.04(5)             | Cl1—Sn1—Cl4                                  | 92.01(2)             |
| Sn1—Cl3                 | 2.4311(6)           | N1—Sn1—Cl4                  | 171.13(5)            | Cl2—Sn1—Cl3                                  | 90.394(19)           |
| Sn1—Cl4                 | 2.3916(5)           | O1—Sn1—Cl1                  | 87.06(4)             | Cl2—Sn1—Cl4                                  | 96.463(19)           |
|                         |                     | O1—Sn1—Cl2                  | 170.30(4)            | Cl3—Sn1—Cl4                                  | 90.87(2)             |
|                         |                     | O1—Sn1—Cl3                  | 90.07(4)             |                                              |                      |
| <b>SnBr</b>             |                     |                             |                      |                                              |                      |
| Sn1—Br1                 | 2.6148(3)           | Br1—Sn1—Br2                 | 90.195(8)            | Br2—Sn1—Br3 <sup>vii</sup>                   | 89.422(9)            |
| Sn1—Br2                 | 2.5886(2)           | Br1—Sn1—Br3                 | 89.468(9)            | Br3—Sn1—Br1 <sup>vii</sup>                   | 90.532(9)            |
| Sn1—Br3                 | 2.5973(3)           | Br1—Sn1—Br1 <sup>vii</sup>  | 180.0                | Br3—Sn1—Br2 <sup>vii</sup>                   | 89.422(9)            |
|                         |                     | Br1—Sn1—Br2 <sup>vii</sup>  | 89.805(8)            | Br3—Sn1—Br3 <sup>vii</sup>                   | 180.0                |
|                         |                     | Br1—Sn1—Br3 <sup>vii</sup>  | 90.533(9)            | Br1 <sup>x</sup> —Sn1—Br2 <sup>vii</sup>     | 90.194(8)            |
|                         |                     | Br2—Sn1—Br3                 | 90.578(9)            | Br1 <sup>x</sup> —Sn1—Br3 <sup>vii</sup>     | 89.468(9)            |
|                         |                     | Br2—Sn1—Br1 <sup>vii</sup>  | 89.806(8)            | Br2 <sup>x</sup> —Sn1—Br3 <sup>vii</sup>     | 90.578(9)            |
|                         |                     | Br2—Sn1—Br2 <sup>vii</sup>  | 180.0                |                                              |                      |
| <b>PbCl</b>             |                     |                             |                      |                                              |                      |
| Pb1—Cl1                 | 2.9227(9)           | Cl1—Pb1—Cl2                 | 90.15(3)             | Cl3—Pb1—Cl1 <sup>viii</sup>                  | 127.17(2)            |
| Pb1—Cl2                 | 2.9133(9)           | Cl1—Pb1—Cl3                 | 75.11(2)             | Cl3—Pb1—Cl1 <sup>ix</sup>                    | 139.15(3)            |
| Pb1—Cl3                 | 3.0343(9)           | Cl1—Pb1—Cl1 <sup>viii</sup> | 84.60(2)             | Cl3—Pb1—Cl2 <sup>viii</sup>                  | 126.54(2)            |
| Pb1—Cl1 <sup>viii</sup> | 2.9536(9)           | Cl1—Pb1—Cl1 <sup>ix</sup>   | 74.08(3)             | Cl3—Pb1—Cl3 <sup>viii</sup>                  | 80.67(2)             |
| Pb1—Cl1 <sup>ix</sup>   | 2.9289(9)           | Cl1—Pb1—Cl2 <sup>viii</sup> | 155.02(2)            | Cl1 <sup>viii</sup> —Pb1—Cl1 <sup>ix</sup>   | 75.45(3)             |
| Pb1—Cl2 <sup>viii</sup> | 2.9267(9)           | Cl1—Pb1—Cl3 <sup>viii</sup> | 127.33(2)            | Cl1 <sup>viii</sup> —Pb1—Cl2 <sup>viii</sup> | 89.29(2)             |
| Pb1—Cl3 <sup>viii</sup> | 3.0759(10)          | Cl2—Pb1—Cl3                 | 74.21(2)             | Cl1 <sup>viii</sup> —Pb1—Cl3 <sup>viii</sup> | 74.05(2)             |
|                         |                     | Cl2—Pb1—Cl1 <sup>viii</sup> | 155.11(2)            | Cl1 <sup>ix</sup> —Pb1—Cl2 <sup>viii</sup>   | 80.94(2)             |
|                         |                     | Cl2—Pb1—Cl1 <sup>ix</sup>   | 79.71(3)             | Cl1 <sup>ix</sup> —Pb1—Cl3 <sup>viii</sup>   | 139.96(2)            |
|                         |                     | Cl2—Pb1—Cl2 <sup>viii</sup> | 85.25(2)             | Cl2 <sup>viii</sup> —Pb1—Cl3 <sup>viii</sup> | 73.40(3)             |
|                         |                     | Cl2—Pb1—Cl3 <sup>viii</sup> | 126.86(3)            |                                              |                      |
| <b>PbBr</b>             |                     |                             |                      |                                              |                      |
| Pb1—Br1                 | 3.0761(3)           | Br1—Pb1—Br2                 | 90.487(8)            | Br3—Pb1—Br1 <sup>viii</sup>                  | 126.168(8)           |
| Pb1—Br2                 | 3.0774(3)           | Br1—Pb1—Br3                 | 73.781(7)            | Br3—Pb1—Br1 <sup>ix</sup>                    | 137.831(8)           |
| Pb1—Br3                 | 3.2315(3)           | Br1—Pb1—Br1 <sup>viii</sup> | 83.288(7)            | Br3—Pb1—Br2 <sup>viii</sup>                  | 126.856(8)           |
| Pb1—Br1 <sup>viii</sup> | 3.0382(3)           | Br1—Pb1—Br1 <sup>ix</sup>   | 75.254(8)            | Br3—Pb1—Br3 <sup>viii</sup>                  | 79.341(7)            |
| Pb1—Br1 <sup>ix</sup>   | 3.0856(3)           | Br1—Pb1—Br2 <sup>viii</sup> | 155.013(7)           | Br1 <sup>viii</sup> —Pb1—Br1 <sup>ix</sup>   | 76.941(8)            |
| Pb1—Br2 <sup>viii</sup> | 3.0308(3)           | Br1—Pb1—Br3 <sup>viii</sup> | 125.491(8)           | Br1 <sup>viii</sup> —Pb1—Br2 <sup>viii</sup> | 92.106(8)            |
| Pb1—Br3 <sup>viii</sup> | 3.1321(3)           | Br2—Pb1—Br3                 | 74.270(8)            | Br1 <sup>viii</sup> —Pb1—Br3 <sup>viii</sup> | 75.738(8)            |
|                         |                     | Br2—Pb1—Br1 <sup>viii</sup> | 155.045(7)           | Br1 <sup>ix</sup> —Pb1—Br2 <sup>viii</sup>   | 79.777(8)            |
|                         |                     | Br2—Pb1—Br1 <sup>ix</sup>   | 78.104(8)            | Br1 <sup>ix</sup> —Pb1—Br3 <sup>viii</sup>   | 142.701(8)           |
|                         |                     | Br2—Pb1—Br2 <sup>viii</sup> | 83.389(7)            | Br2 <sup>viii</sup> —Pb1—Br3 <sup>viii</sup> | 76.367(8)            |
|                         |                     | Br2—Pb1—Br3 <sup>viii</sup> | 126.257(8)           |                                              |                      |
| <b>BiCl</b>             |                     |                             |                      |                                              |                      |
| Bi1—Cl1                 | 2.5979(5)           | Cl1—Bi1—Cl2                 | 92.558(17)           | Cl2—Bi1—Cl6                                  | 87.845(15)           |
| Bi1—Cl2                 | 2.6900(5)           | Cl1—Bi1—Cl3                 | 173.797(14)          | Cl3—Bi1—Cl4                                  | 87.778(14)           |
| Bi1—Cl3                 | 2.9822(5)           | Cl1—Bi1—Cl4                 | 89.450(16)           | Cl3—Bi1—Cl5                                  | 83.700(13)           |
| Bi1—Cl4                 | 2.7331(5)           | Cl1—Bi1—Cl5                 | 90.805(15)           | Cl3—Bi1—Cl6                                  | 93.309(13)           |
| Bi1—Cl5                 | 2.6863(4)           | Cl1—Bi1—Cl6                 | 92.307(15)           | Cl4—Bi1—Cl5                                  | 91.036(15)           |
| Bi1—Cl6                 | 2.7150(5)           | Cl2—Bi1—Cl3                 | 90.284(15)           | Cl4—Bi1—Cl6                                  | 91.454(15)           |
|                         |                     | Cl2—Bi1—Cl4                 | 177.899(16)          | Cl5—Bi1—Cl6                                  | 176.031(14)          |
|                         |                     | Cl2—Bi1—Cl5                 | 89.558(15)           |                                              |                      |

Symmetry transformations used to generate equivalent atoms: (i)  $-x+1, y, -z+0.5$ ; (ii)  $-x+0.5, y, -z+0.5$ ; (iii)  $-x+1.5, y, -z+0.5$ ; (iv)  $-x+1.5, y+0.5, -z+1.5$ ; (v)  $-x+1.5, y-0.5, -z+1.5$ ; (vi)  $x, y-1, z$ ; (vii)  $-x+1, -y, -z+1$ ; (viii)  $x+1, y, z$ ; (ix)  $-x+1, -y+1, -z$

Table S3. Stacking interactions in the studied compounds.

Each ring is indicated by one atom, which belongs solely to this ring. The  $\alpha$  is a dihedral angle between planes I and J,  $\beta$  is an angle between Cg(I)-Cg(J) vector and normal to plane I,  $d_p$  is a perpendicular distance of Cg(I) on ring J plane.

| R(I)•••R(J)               | d(Cg•••Cg) [Å] | $\alpha$ [°] | $\beta$ [°] | $d_p$ [Å]  |
|---------------------------|----------------|--------------|-------------|------------|
| <b>FeCl</b>               |                |              |             |            |
| N1•••N11                  | 4.1582(12)     | 3.69(10)     | 36.0        | 3.3852(8)  |
| N1•••C18                  | 3.7117(12)     | 1.70(10)     | 23.5        | 3.3702(8)  |
| C8•••N11                  | 3.7355(12)     | 3.33(10)     | 27.1        | 3.3997(9)  |
| C8•••C18                  | 3.5892(13)     | 1.65(10)     | 19.0        | 3.3705(9)  |
| N1•••C18 <sup>i</sup>     | 4.1685(12)     | 1.70(10)     | 35.2        | 3.4382(8)  |
| C8•••C18 <sup>i</sup>     | 4.5109(13)     | 1.65(10)     | 41.7        | 3.4380(9)  |
| <b>FerBr</b>              |                |              |             |            |
| N1•••N11                  | 4.1848(12)     | 2.70(11)     | 36.0        | 3.4054(9)  |
| N1•••C18                  | 3.7285(13)     | 1.54(11)     | 23.5        | 3.3838(9)  |
| C8•••N11                  | 3.7538(13)     | 2.91(11)     | 26.8        | 3.3931(9)  |
| C8•••C18                  | 3.5958(13)     | 1.82(11)     | 18.8        | 3.3782(9)  |
| N1•••C18 <sup>i</sup>     | 4.3850(13)     | 1.54(11)     | 38.7        | 3.4421(9)  |
| C8•••C18 <sup>i</sup>     | 4.8082(13)     | 1.82(11)     | 45.5        | 3.4478(9)  |
| <b>CoCl</b>               |                |              |             |            |
| N1•••N1 <sup>ii</sup>     | 3.8002(12)     | 0.02(10)     | 28.4        | 3.3443(9)  |
| N1•••C8 <sup>ii</sup>     | 3.6353(12)     | 0.54(10)     | 22.7        | 3.3424(9)  |
| <b>CoBr</b>               |                |              |             |            |
| N1•••C8 <sup>iii</sup>    | 3.706(6)       | 2.1(5)       | 26.2        | 3.267(4)   |
| C8•••C8 <sup>iii</sup>    | 3.565(6)       | 0.0(5)       | 22.0        | 3.306(5)   |
| C8•••C8 <sup>iv</sup>     | 4.129(6)       | 0.0(5)       | 34.6        | 3.398(5)   |
| N11•••C18 <sup>v</sup>    | 3.553(6)       | 2.3(5)       | 25.1        | 3.195(5)   |
| C18•••C18 <sup>v</sup>    | 3.590(6)       | 0.0(5)       | 25.7        | 3.235(4)   |
| C18•••C18 <sup>vi</sup>   | 4.052(6)       | 0.0(5)       | 35.7        | 3.290(4)   |
| <b>CuCl</b>               |                |              |             |            |
| N1•••C8 <sup>vii</sup>    | 3.5916(11)     | 1.37(10)     | 23.3        | 3.3279(8)  |
| C8•••C8 <sup>vii</sup>    | 3.9500(14)     | 0.00(10)     | 33.4        | 3.2985(9)  |
| C8•••N11 <sup>iv</sup>    | 3.8499(13)     | 7.72(10)     | 23.0        | 3.3604(8)  |
| C8•••C18 <sup>iv</sup>    | 3.5768(12)     | 6.91(10)     | 18.7        | 3.3747(8)  |
| N11•••C18 <sup>viii</sup> | 3.6889(12)     | 1.15(10)     | 27.3        | 3.2990(9)  |
| C18•••C18 <sup>viii</sup> | 3.4623(13)     | 0.00(10)     | 17.9        | 3.2941(8)  |
| <b>ZnCl</b>               |                |              |             |            |
| N1•••N1 <sup>ii</sup>     | 3.7964(9)      | 0.00(7)      | 28.4        | 3.3380(6)  |
| N1•••C8 <sup>ii</sup>     | 3.6296(9)      | 0.51(7)      | 22.8        | 3.3357(6)  |
| <b>CdCl</b>               |                |              |             |            |
| N1•••N1 <sup>ii</sup>     | 3.7696(12)     | 0.00(11)     | 27.4        | 3.3458(9)  |
| N1•••C8 <sup>ii</sup>     | 3.7003(13)     | 1.02(11)     | 24.6        | 3.3443(9)  |
| <b>CdBr</b>               |                |              |             |            |
| N1•••N1 <sup>ii</sup>     | 3.7084(15)     | 0.02(12)     | 25.5        | 3.3476(10) |
| N1•••C8 <sup>ii</sup>     | 3.7989(15)     | 0.98(12)     | 27.6        | 3.3445(10) |
| <b>HgCl(1)</b>            |                |              |             |            |
| N1•••N1 <sup>ii</sup>     | 3.7694(9)      | 0.02(7)      | 27.6        | 3.3416(6)  |
| N1•••C8 <sup>ii</sup>     | 3.6997(9)      | 0.88(7)      | 24.8        | 3.3403(6)  |
| <b>HgCl(2)</b>            |                |              |             |            |
| N1•••N1 <sup>ix</sup>     | 4.3664(15)     | 0.00(12)     | 40.6        | 3.3133(11) |
| N1•••C8 <sup>ix</sup>     | 3.4295(16)     | 0.23(13)     | 15.4        | 3.3071(11) |
| C8•••C8 <sup>ix</sup>     | 4.3664(16)     | 0.00(13)     | 40.8        | 3.3065(11) |
| <b>HgBr</b>               |                |              |             |            |
| N1•••C8 <sup>iii</sup>    | 3.694(4)       | 1.0(3)       | 26.3        | 3.283(3)   |
| C8•••C8 <sup>iii</sup>    | 3.566(4)       | 0.0(3)       | 22.4        | 3.298(3)   |
| C8•••C8 <sup>iv</sup>     | 4.276(4)       | 0.0(3)       | 37.0        | 3.416(3)   |
| N11•••C18 <sup>v</sup>    | 3.576(4)       | 2.1(3)       | 25.4        | 3.214(3)   |
| C18•••C18 <sup>v</sup>    | 3.603(4)       | 0.0(3)       | 25.8        | 3.244(3)   |
| C18•••C18 <sup>vi</sup>   | 4.196(4)       | 0.0(3)       | 38.1        | 3.302(3)   |
| <b>SnCl(1)</b>            |                |              |             |            |
| N1•••N1 <sup>x</sup>      | 3.484(4)       | 0.0(3)       | 15.1        | 3.364(3)   |
| N1•••C8 <sup>x</sup>      | 3.681(4)       | 0.7(3)       | 24.5        | 3.368(3)   |
| N1•••C8 <sup>xi</sup>     | 3.634(4)       | 0.7(3)       | 22.7        | 3.368(3)   |
| C8•••C8 <sup>xi</sup>     | 3.781(4)       | 0.0(3)       | 27.5        | 3.353(3)   |



|                           |            |           |      |            |
|---------------------------|------------|-----------|------|------------|
| <b>SnCl(2)</b>            |            |           |      |            |
| N1•••N1 <sup>iii</sup>    | 4.0942(13) | 0.00(10)  | 32.4 | 3.4585(9)  |
| N1•••C8 <sup>iii</sup>    | 3.8416(12) | 2.02(10)  | 25.6 | 3.4131(9)  |
| N11•••C18 <sup>xii</sup>  | 4.1920(13) | 16.45(11) | 32.7 | 2.7611(9)  |
| C18•••C18 <sup>xii</sup>  | 4.0300(14) | 13.72(11) | 30.7 | 3.2558(9)  |
| C18•••N11 <sup>xiii</sup> | 4.1921(13) | 16.45(11) | 48.8 | 3.5285(9)  |
| C18•••C18 <sup>xiii</sup> | 4.0300(14) | 13.72(11) | 36.1 | 3.4660(9)  |
| <b>SnBr</b>               |            |           |      |            |
| N1•••N1 <sup>x</sup>      | 3.4769(17) | 0.00(14)  | 12.1 | 3.4000(12) |
| N1•••C8 <sup>x</sup>      | 3.7906(17) | 0.52(14)  | 26.7 | 3.3999(12) |
| N1•••C8 <sup>xi</sup>     | 3.7592(17) | 0.52(14)  | 25.1 | 3.4166(12) |
| C8•••C8 <sup>xi</sup>     | 3.8463(17) | 0.00(14)  | 27.5 | 3.4103(12) |
| <b>PbCl</b>               |            |           |      |            |
| N1•••N1 <sup>i</sup>      | 3.955(2)   | 0.02(19)  | 31.2 | 3.3825(16) |
| N1•••C8 <sup>i</sup>      | 3.811(2)   | 0.59(19)  | 27.6 | 3.3752(16) |
| C8•••C8 <sup>i</sup>      | 3.955(2)   | 0.03(19)  | 31.8 | 3.3612(17) |
| <b>PbBr</b>               |            |           |      |            |
| N1•••N1 <sup>i</sup>      | 4.0630(17) | 0.02(14)  | 31.9 | 3.4507(12) |
| N1•••C8 <sup>i</sup>      | 3.9487(17) | 0.26(14)  | 28.8 | 3.4536(12) |
| C8•••C8 <sup>i</sup>      | 4.0632(17) | 0.03(14)  | 31.7 | 3.4561(12) |
| <b>BiCl</b>               |            |           |      |            |
| N1•••N11 <sup>iii</sup>   | 4.4349(11) | 9.05(9)   | 39.8 | 3.1272(8)  |
| N1•••C18 <sup>iii</sup>   | 3.6716(11) | 6.91(9)   | 23.8 | 3.1646(8)  |
| C8•••N11 <sup>iii</sup>   | 3.9322(12) | 7.42(10)  | 32.1 | 3.4552(9)  |
| C8•••C18 <sup>iii</sup>   | 3.4756(12) | 4.79(10)  | 14.8 | 3.4129(9)  |
| C8•••N31 <sup>iv</sup>    | 4.5325(12) | 5.43(10)  | 45.7 | 3.2381(9)  |
| N11•••N11 <sup>xiv</sup>  | 4.1467(11) | 0.03(9)   | 36.1 | 3.3514(8)  |
| N11•••C18 <sup>xiv</sup>  | 4.0164(12) | 3.04(9)   | 32.3 | 3.2766(8)  |
| N21•••N21 <sup>xv</sup>   | 4.8966(12) | 0.00(9)   | 47.9 | 3.2833(8)  |
| N21•••C28 <sup>xv</sup>   | 4.6304(12) | 1.86(10)  | 44.4 | 3.2155(8)  |
| N21•••N31 <sup>v</sup>    | 4.3330(11) | 7.72(10)  | 42.8 | 3.4418(8)  |
| N21•••C38 <sup>v</sup>    | 3.7459(11) | 5.60(9)   | 23.3 | 3.3635(8)  |
| C28•••N31 <sup>v</sup>    | 3.8351(12) | 6.38(10)  | 33.1 | 3.4126(9)  |
| C28•••C38 <sup>v</sup>    | 3.5472(12) | 3.91(9)   | 15.0 | 3.4079(9)  |
| <b>8hqHCl</b>             |            |           |      |            |
| N1•••C8 <sup>iii</sup>    | 3.8001(18) | 0.79(15)  | 27.6 | 3.3550(12) |
| C8•••C8 <sup>iii</sup>    | 3.5671(18) | 0.00(15)  | 19.2 | 3.3680(13) |
| <b>8hqHBr</b>             |            |           |      |            |
| N1•••C8 <sup>iii</sup>    | 3.8293(13) | 0.78(11)  | 28.0 | 3.3594(9)  |
| C8•••C8 <sup>iii</sup>    | 3.5609(14) | 0.00(11)  | 18.6 | 3.3743(10) |

Symmetry transformations used to generate equivalent atoms: (i) x+1, y, z; (ii) -x+0.5, -y+0.5, -z+1; (iii) -x+1, -y+1, -z+1; (iv) -x+1, -y+2, -z+1; (v) -x+1, -y+2, -z; (vi) -x+1, -y+1, -z; (vii) -x+2, -y+1, -z; (viii) -x, -y, -z+1; (ix) x, y-1, z; (x) -x+2, -y+1, -z+2; (xi) -x+1, -y+1, -z+2; (xii) x-0.5, y, -z+1.5; (xiii) x+0.5, y, -z+1.5; (xiv) -x, -y+1, -z+1; (xv) -x, -y+2, -z; (xvi) -x+1, -y, -z+1

Table S4. Hydrogen bond in the studied compounds.

| D-H•••A                       | d(D—H) [Å] | d(H•••A) [Å] | d(D•••A) [Å] | <(DHA) [°] | G <sub>d</sub> <sup>a</sup> (n)        |
|-------------------------------|------------|--------------|--------------|------------|----------------------------------------|
| <b>FeCl</b>                   |            |              |              |            |                                        |
| N1—H1N•••C199 <sup>i</sup>    | 0.79       | 2.46         | 3.1333(17)   | 143.8      | D(2)                                   |
| O1—H1O•••C199                 | 0.84       | 2.30         | 3.1169(16)   | 164.4      | D(2)                                   |
| N11—H11N•••C199 <sup>ii</sup> | 0.81       | 2.41         | 3.1577(18)   | 152.8      | D(2)                                   |
| O11—H11O•••C199               | 0.84       | 2.24         | 3.0693(15)   | 167.2      | D(2)                                   |
| <b>FerBr</b>                  |            |              |              |            |                                        |
| N1—H1N•••Br99 <sup>i</sup>    | 0.82       | 2.53         | 3.2652(19)   | 149.7      | D(2)                                   |
| O1—H1O•••Br99                 | 0.84       | 2.44         | 3.2530(16)   | 163.1      | D(2)                                   |
| N11—H11N•••Br99 <sup>ii</sup> | 0.85       | 2.53         | 3.2621(19)   | 145.1      | D(2)                                   |
| O11—H11O•••Br99               | 0.84       | 2.40         | 3.2235(16)   | 168.2      | D(2)                                   |
| <b>CoCl</b>                   |            |              |              |            |                                        |
| N1—H1N•••Cl1                  | 0.95       | 2.26         | 3.0985(17)   | 147.0      | D(2) [D <sub>2</sub> <sup>2</sup> (5)] |
| O1—H1O•••Cl2 <sup>iii</sup>   | 0.84       | 2.25         | 3.0922(16)   | 179.4      | D(2) [D <sub>2</sub> <sup>2</sup> (5)] |
| <b>CoBr</b>                   |            |              |              |            |                                        |
| N1—H1N•••Br12 <sup>iv</sup>   | 0.90       | 2.74         | 3.407(10)    | 132.4      | D(2) [D <sub>2</sub> <sup>2</sup> (5)] |
| O1—H1O•••Br2                  | 0.84       | 2.42         | 3.259(9)     | 178.7      | D(2) [D <sub>2</sub> <sup>2</sup> (5)] |

| D-H...A                        | d(D—H) [Å] | d(H...A) [Å] | d(D...A) [Å] | <(DHA) [°] | G <sub>d</sub> <sup>a</sup> (n)        |
|--------------------------------|------------|--------------|--------------|------------|----------------------------------------|
| N11—H11N...Br11                | 0.87       | 2.48         | 3.254(10)    | 147.6      | D(2) [D <sub>2</sub> <sup>2</sup> (5)] |
| O11—H11O...Br1                 | 0.84       | 2.44         | 3.265(7)     | 166.7      | D(2) [D <sub>2</sub> <sup>2</sup> (5)] |
| <b>CuCl</b>                    |            |              |              |            |                                        |
| N1—H1N...Cl2 <sup>v</sup>      | 0.96       | 2.38         | 3.1737(18)   | 139.4      | D(2)                                   |
| O1—H1O...Cl2                   | 0.84       | 2.26         | 3.092(2)     | 173.5      | D(2)                                   |
| N11—H11N...Cl4 <sup>vi</sup>   | 0.95       | 2.40         | 3.268(2)     | 152.2      | D(2)                                   |
| O11—H11O...Cl1                 | 0.84       | 2.23         | 3.0742(18)   | 178.9      | D(2)                                   |
| <b>ZnCl</b>                    |            |              |              |            |                                        |
| N1—H1N...Cl1                   | 0.94       | 2.23         | 3.0868(13)   | 150.2      | D(2) [D <sub>2</sub> <sup>2</sup> (5)] |
| O1—H1O...Cl2 <sup>iii</sup>    | 0.84       | 2.26         | 3.0973(12)   | 178.0      | D(2) [D <sub>2</sub> <sup>2</sup> (5)] |
| <b>CdCl</b>                    |            |              |              |            |                                        |
| N1—H1N...Cl1                   | 0.91       | 2.25         | 3.0812(17)   | 152.7      | D(2) [D <sub>2</sub> <sup>2</sup> (5)] |
| O1—H1O...Cl2 <sup>iii</sup>    | 0.84       | 2.26         | 3.0960(16)   | 177.1      | D(2) [D <sub>2</sub> <sup>2</sup> (5)] |
| <b>CdBr</b>                    |            |              |              |            |                                        |
| N1—H1N...Br1                   | 0.87       | 2.40         | 3.237(2)     | 161.6      | D(2) [D <sub>2</sub> <sup>2</sup> (5)] |
| O1—H1O...Br2 <sup>iii</sup>    | 0.84       | 2.43         | 3.2708(18)   | 178.1      | D(2) [D <sub>2</sub> <sup>2</sup> (5)] |
| <b>HgCl(1)</b>                 |            |              |              |            |                                        |
| N1—H1N...Cl1                   | 0.84       | 2.33         | 3.0854(13)   | 150.0      | D(2) [D <sub>2</sub> <sup>2</sup> (5)] |
| O1—H1O...Cl2 <sup>iii</sup>    | 0.84       | 2.26         | 3.1032(12)   | 177.2      | D(2) [D <sub>2</sub> <sup>2</sup> (5)] |
| <b>HgCl(2)</b>                 |            |              |              |            |                                        |
| N1—H1N...O99                   | 0.90       | 1.89         | 2.747(3)     | 159.1      | D(2)                                   |
| O1—H1O...O98                   | 0.84       | 1.79         | 2.633(3)     | 176.1      | D(2)                                   |
| O98—H98O...Cl3 <sup>vii</sup>  | 0.90       | 2.45         | 3.210(2)     | 141.5      | D(2)                                   |
| O98—H98P...Cl2 <sup>vii</sup>  | 0.93       | 2.78         | 3.474(2)     | 132.3      | D(2)                                   |
| O98—H98P...Cl3 <sup>viii</sup> | 0.93       | 2.67         | 3.367(2)     | 132.9      | D(2)                                   |
| O99—H99O...O99 <sup>viii</sup> | 0.95       | 1.85         | 2.763(3)     | 161.9      | C(2)                                   |
| O99—H99P...Cl3                 | 0.90       | 2.27         | 3.119(2)     | 157.7      | D(2)                                   |
| <b>HgBr</b>                    |            |              |              |            |                                        |
| N1—H1N...Br12 <sup>iv</sup>    | 0.84       | 2.70         | 3.420(5)     | 145.2      | D(2) [D <sub>2</sub> <sup>2</sup> (5)] |
| O1—H1O...Br2                   | 0.84       | 2.48         | 3.256(5)     | 153.1      | D(2) [D <sub>2</sub> <sup>2</sup> (5)] |
| N11—H11N...Br11                | 0.85       | 2.52         | 3.295(5)     | 151.5      | D(2) [D <sub>2</sub> <sup>2</sup> (5)] |
| O11—H11O...Br1                 | 0.84       | 2.43         | 3.269(5)     | 175.9      | D(2) [D <sub>2</sub> <sup>2</sup> (5)] |
| <b>SnCl(1)</b>                 |            |              |              |            |                                        |
| N1—H1N...O99 <sup>v</sup>      | 0.88       | 2.00         | 2.857(7)     | 165.0      | D(2)                                   |
| O1—H1O...O99                   | 0.84       | 1.86         | 2.693(7)     | 174.3      | D(2)                                   |
| O99—H99O...Cl2 <sup>ix</sup>   | 0.91       | 2.62         | 3.357(5)     | 138.9      | D(2) [D <sub>2</sub> <sup>2</sup> (5)] |
| O99—H99O...Cl3 <sup>ix</sup>   | 0.91       | 2.74         | 3.489(5)     | 141.4      | D(2) [D <sub>2</sub> <sup>2</sup> (5)] |
| O99—H99B...Cl1                 | 0.89       | 2.56         | 3.275(6)     | 137.9      | D(2) [D <sub>2</sub> <sup>2</sup> (5)] |
| O99—H99B...Cl3 <sup>vi</sup>   | 0.89       | 2.61         | 3.323(5)     | 138.2      | D(2) [D <sub>2</sub> <sup>2</sup> (5)] |
| <b>SnCl(2)</b>                 |            |              |              |            |                                        |
| N11—H11N...O99                 | 0.83       | 1.92         | 2.737(2)     | 169.9      | D(2)                                   |
| O11—H11O...O1                  | 0.84       | 1.93         | 2.724(2)     | 157.3      | D(2)                                   |
| O99—H99O...Cl3                 | 0.79       | 2.47         | 3.2376(18)   | 165.1      | D(2)                                   |
| O99—H99P...Cl4 <sup>x</sup>    | 0.90       | 2.48         | 3.1927(19)   | 136.8      | D(2)                                   |
| <b>SnBr</b>                    |            |              |              |            |                                        |
| N1—H1N...O99 <sup>v</sup>      | 0.95       | 1.94         | 2.842(3)     | 159.7      | D(2)                                   |
| O1—H1O...O99                   | 0.84       | 1.89         | 2.725(3)     | 175.3      | D(2)                                   |
| O99—H99O...Br2 <sup>ix</sup>   | 0.85       | 2.95         | 3.602(3)     | 134.7      | D(2) [D <sub>2</sub> <sup>2</sup> (5)] |
| O99—H99O...Br3 <sup>ix</sup>   | 0.85       | 2.80         | 3.529(2)     | 144.8      | D(2) [D <sub>2</sub> <sup>2</sup> (5)] |
| O99—H99B...Br1                 | 0.89       | 2.57         | 3.428(2)     | 159.8      | D(2) [D <sub>2</sub> <sup>2</sup> (5)] |
| O99—H99B...Br3 <sup>vi</sup>   | 0.89       | 2.96         | 3.415(2)     | 113.6      | D(2) [D <sub>2</sub> <sup>2</sup> (5)] |
| <b>PbCl</b>                    |            |              |              |            |                                        |
| N1—H1N...Cl2 <sup>xi</sup>     | 0.80       | 2.48         | 3.173(3)     | 145.8      | D(2) [D <sub>2</sub> <sup>2</sup> (5)] |
| O1—H1O...Cl3                   | 0.84       | 2.27         | 3.098(3)     | 171.8      | D(2) [D <sub>2</sub> <sup>2</sup> (5)] |
| <b>PbBr</b>                    |            |              |              |            |                                        |
| N1—H1N...Br2 <sup>xi</sup>     | 0.89       | 2.52         | 3.292(2)     | 145.6      | D(2) [D <sub>2</sub> <sup>2</sup> (5)] |
| O1—H1O...Br3                   | 0.84       | 2.42         | 3.260(2)     | 174.4      | D(2) [D <sub>2</sub> <sup>2</sup> (5)] |
| <b>BiCl</b>                    |            |              |              |            |                                        |
| N1—H1N...Cl199 <sup>xii</sup>  | 0.88       | 2.43         | 3.1742(18)   | 142        | D(2)                                   |
| O1—H1O...O99                   | 0.84       | 1.82         | 2.652(2)     | 174        | D(2)                                   |
| N11—H11N...Cl3 <sup>xiii</sup> | 0.88       | 2.41         | 3.1825(17)   | 147        | D(2)                                   |
| O11—H11O...Cl99                | 0.84       | 2.27         | 3.1118(17)   | 178        | D(2)                                   |
| N21—H21N...Cl3 <sup>xiii</sup> | 0.88       | 2.42         | 3.1674(17)   | 142        | D(2)                                   |
| O21—H21O...O98                 | 0.84       | 1.85         | 2.688(2)     | 176        | D(2)                                   |

| D-H...A                         | d(D—H) [Å] | d(H...A) [Å] | d(D...A) [Å] | <(DHA) [°] | G <sub>d</sub> <sup>a</sup> (n) |
|---------------------------------|------------|--------------|--------------|------------|---------------------------------|
| N31—H31N...C199 <sup>xii</sup>  | 0.88       | 2.36         | 3.1518(17)   | 150        | D(2)                            |
| O31—H31O...C13 <sup>xiv</sup>   | 0.84       | 2.30         | 3.1419(17)   | 175        | D(2)                            |
| O98—H98O...C13 <sup>xv</sup>    | 0.77       | 2.45         | 3.1937(16)   | 164        | D(2)                            |
| O98—H98P...C14 <sup>xvi</sup>   | 0.90       | 2.34         | 3.1893(16)   | 158        | D(2)                            |
| O99—H99O...C199 <sup>xvii</sup> | 0.97       | 2.17         | 3.1119(17)   | 165        | D(2)                            |
| O99—H99P...C12 <sup>xviii</sup> | 0.97       | 2.65         | 3.3619(17)   | 131        | D(2)                            |
| <b>8hqHCl</b>                   |            |              |              |            |                                 |
| N1—H1N...C11                    | 0.91       | 2.27         | 3.107(3)     | 153.3      | D(2)                            |
| O1—H1O...O99                    | 0.84       | 1.76         | 2.596(3)     | 173.9      | D(2)                            |
| O99—H99O...C11 <sup>xiii</sup>  | 0.85       | 2.27         | 3.114(3)     | 171.5      | D(2)                            |
| O99—H99P...C1 <sup>xix</sup>    | 0.91       | 2.27         | 3.159(2)     | 165.6      | D(2)                            |
| <b>8hqHBr</b>                   |            |              |              |            |                                 |
| N1—H1N...Br1                    | 0.90       | 2.44         | 3.2360(18)   | 148.1      | D(2)                            |
| O1—H1O...O99                    | 0.84       | 1.76         | 2.600(2)     | 177.0      | D(2)                            |
| O99—H99O...Br1 <sup>xiv</sup>   | 0.79       | 2.46         | 3.2435(16)   | 167.5      | D(2)                            |
| O99—H99P...Br1 <sup>xv</sup>    | 0.89       | 2.42         | 3.2873(16)   | 166.0      | D(2)                            |

Symmetry transformations used to generate equivalent atoms: (i) -x, -y+1, -z+1; (ii) -x, -y, -z+1; (iii) x, -y+1, z+0.5; (iv) x-0.5, -y+1, z+0.5; (v) -x+2, -y+1, -z+1; (vi) -x+1, -y, -z+1; (vii) -x+0.5, y+1.5, -z+1.5; (viii) -x+0.5, y+0.5, -z+1.5; (ix) x+1, y, z; (x) x-0.5, y, -z+1.5; (xi) x+0.5, -y+0.5, z+0.5; (xii) x+1, y+1, z; (xiii) x-1, y, z; (xiv) x, y+1, z; (xv) -x+1, -y+1, -z; (xvi) -x, -y+1, -z; (xvii) -x+1, -y+1, -z+1; (xviii) -x+2, -y+2, -z+1; (xix) -x+1, y-0.5, -z+1.5;

Table S5. Vibrational frequencies (cm<sup>-1</sup>) and their assignment for the studied compounds.

Vibrations symbols: w – weak, m – medium, s – strong, b - broadened v – stretching,  $\delta$  – bending,  $\sigma$  – scissoring,  $\rho$  – rocking,  $\tau$  – twisting,  $\omega$  – wagging, T – torsional  $\alpha$  – in plane,  $\gamma$  – out of plane, as – asymmetric, s – symmetric, ar – aromatic ring.

| PbCl   | PbBr   | HgCl(1)       | HgCl(2)        | HgBr           | 8hqHCl | 8hqHBr          | 8hq                     | Assignment                                                                                 |
|--------|--------|---------------|----------------|----------------|--------|-----------------|-------------------------|--------------------------------------------------------------------------------------------|
| 3451sb | 3464sb | 3477s         | 3464s          | 3460sb         | 3387sb | 3391sb<br>3318s |                         | v OH                                                                                       |
| 1631s  | 1629s  | 1632s         | 1633s          | 1633s          | 1631s  | 1632s           | 1638s                   | v CO, v <sub>s</sub> CC, v <sub>as</sub> ring,<br>$\delta$ COH                             |
| 1603s  | 1602s  | 1605s         | 1605s          | 1603s          | 1604s  | 1606s           |                         | v <sub>s</sub> CC, v <sub>s</sub> CN, $\delta$ NH                                          |
| 1587m  | 1588m  | 1592w         | 1592w          | 1592w          | 1591s  | 1592s           | 1593w<br>1580s          | v CN, v <sub>s</sub> CC, vCH<br>v CC, v CN, v CH                                           |
| 1553s  | 1551s  | 1553s         | 1554s          | 1552s          | 1551s  | 1552s           |                         | v CC, $\tau$ CH                                                                            |
| 1490m  | 1488m  | 1490m         | 1491m          | 1491m          | 1500m  | 1499m           | 1510s                   | $\delta$ OH, $\delta$ CH, v CC                                                             |
| 1470w  | 1470w  | 1471w         | 1471w          | 1471w          | 1472m  | 1471m           | 1499s<br>1473s<br>1434m | v <sub>s</sub> CC, v <sub>s</sub> CN, $\delta$ CH<br>$\alpha$ $\delta$ OH<br>$\delta$ OH   |
| 1421w  | 1420w  | 1418s         | 1418s          | 1417s          |        |                 |                         | v CC, $\delta$ OH, v CH                                                                    |
| 1414m  | 1413m  |               |                |                |        |                 | 1410s                   | v CC, $\delta$ OH, v CH                                                                    |
| 1397s  | 1396s  | 1401s         | 1400s          | 1400s          | 1400s  | 1400s           | 1399m                   | v CO, $\delta$ OH                                                                          |
| 1371m  | 1369m  | 1377w         | 1376w          | 1375w          | 1381s  | 1380s           | 1380s                   | $\gamma$ OH, $\delta$ CH, v CC,<br>v <sub>as</sub> ring                                    |
|        | 1321s  |               |                |                | 1316s  | 1317s           |                         | v CN                                                                                       |
| 1295s  | 1296s  | 1300s         | 1300s          | 1299s          | 1300s  | 1297s           |                         | v CN                                                                                       |
| 1273m  | 1280m  | 1285m         | 1287m          | 1284m          |        |                 | 1286s                   | v CO, v CN, v <sub>as</sub> ring                                                           |
|        |        |               |                |                | 1269s  | 1271s           | 1274s                   | v CO, v CN, v <sub>as</sub> ring                                                           |
|        |        |               |                |                |        |                 | 1244m                   | v CO, v CN, v <sub>as</sub> ring                                                           |
| 1226w  | 1223w  | 1224w         | 1225w          | 1223w          | 1220m  | 1218m           | 1223s                   | v CO, v CH                                                                                 |
| 1201m  | 1200m  | 1200m         | 1201m          | 1200m          | 1205m  | 1202m           | 1205s                   | v CC, vCH                                                                                  |
| 1169w  | 1167w  | 1168w         | 1168w          | 1167w          |        |                 | 1165m                   | $\delta$ CH                                                                                |
| 1142w  | 1141w  | 1141w         | 1141w          | 1140w          | 1134w  | 1134w           | 1139m                   | $\delta$ CH, $\delta$ OH                                                                   |
| 1094s  | 1093s  | 1093s         | 1093s          | 1093s          | 1099s  | 1097s           | 1094m                   | $\delta$ CH, v <sub>s</sub> CN, v <sub>s</sub> ring, $\delta$<br>OH                        |
| 1057m  | 1057m  | 1057w         | 1058w          | 1058w          | 1059m  | 1058m           | 1059m                   | $\gamma$ CH, v CC                                                                          |
| 998w   | 996m   | 997w          | 997w           |                | 999w   | 998m            |                         | $\delta$ CH                                                                                |
|        | 985w   | 983w          | 983w           | 983w           |        |                 | 974m                    | $\omega$ CH                                                                                |
| 905w   | 905w   | 905w          | 905m           | 905w           |        | 907w            |                         | $\omega$ CH                                                                                |
| 887s   | 886s   | 889s          | 888s           | 888s           | 881m   | 886m            | 897m                    | $\gamma$ OH, $\gamma$ CH                                                                   |
| 821s   | 821s   | 818s          | 817s           | 818s           | 821s   | 822s            | 817s                    | v <sub>s</sub> CN, $\gamma$ CH, $\omega$ CH,<br>v <sub>s</sub> ring, v <sub>as</sub> ring, |
|        |        | 809s          | 808s           | 808s           |        |                 | 807m                    | v CC                                                                                       |
| 802s   | 801s   | 801s          | 800s           | 801s           | 802m   | 802w            |                         | v CC                                                                                       |
| 780s   | 777s   | 773s          | 772s           | 773m           | 784m   | 782w            | 782m                    | $\gamma$ CH                                                                                |
| 756s   | 755s   | 758s          | 758s           | 759s           | 756s   | 754s            |                         | $\gamma$ CH                                                                                |
|        |        |               |                |                |        |                 | 741s                    | v <sub>as</sub> ring, T <sub>s</sub> ring, T OH                                            |
| 712m   | 712m   | 711m          | 710m           | 710m           | 712s   | 711m            | 711s                    | $\gamma$ CH<br>v CN                                                                        |
| 620w   | 618s   | 614w<br>598mb | 612mb<br>609mb | 615mb<br>600mb | 623m   | 622m            | 637s                    | $\gamma$ CH<br>$\gamma$ CH                                                                 |
| 575wb  | 573w   | 573m          | 574m           | 574m           | 578m   | 574m            | 574m                    | $\delta$ ring, T ring                                                                      |
| 536w   | 537m   | 538m          | 538m           | 537m           | 541m   | 542w            | 544m                    | $\delta$ ring, $\alpha$ CO, T ring                                                         |
| 489w   | 488m   | 487w          | 488w           | 487w           | 488m   | 488m            | 490m                    | v CC, $\omega$ CO                                                                          |
| 480w   | 479w   | 477w          |                |                | 474w   | 473w            |                         | v CC, $\omega$ CO                                                                          |
| 471w   | 468w   | 468w          | 470w           | 468w           |        |                 | 471m                    | $\gamma$ CO                                                                                |
|        |        |               |                |                |        |                 | 464m                    | $\gamma$ CO, T ring                                                                        |
|        | 457w   |               |                | 457w           |        | 458w            |                         | $\gamma$ CO                                                                                |
| 408m   | 407s   | 406m          | 406s           | 406m           | 413s   | 410m            | 423m                    | $\delta$ ring                                                                              |

Table S5. *continued*

| CoCl   | FeCl   | CuCl  | ZnCl  | CdCl   | SnCl(1) | SnCl(2) | BiCl   | Assignment                                                                           |
|--------|--------|-------|-------|--------|---------|---------|--------|--------------------------------------------------------------------------------------|
| 3378sb | 3461sb | 3378s | 3444s | 3451sb | 3434sb  | 3515sb  | 3435sb | v OH                                                                                 |
| 3314s  |        |       |       |        |         | 3461sb  |        | v OH                                                                                 |
| 1633s  | 1631s  | 1633s | 1632s | 1631s  | 1638sb  | 1634s   | 1631s  | v CO, v <sub>s</sub> CC, v <sub>as</sub> ring,<br>δ COH                              |
| 1605s  | 1602m  | 1602s | 1604s | 1602s  | 1607m   | 1606s   | 1599s  | v <sub>s</sub> CC, v <sub>s</sub> CN, δ NH                                           |
| 1592s  | 1592m  | 1592s | 1591s | 1592s  |         | 1592s   |        | v <sub>s</sub> CC, v <sub>s</sub> CN, v CH                                           |
|        |        |       |       |        | 1579w   |         |        | v CC, v CN, v CH                                                                     |
| 1552s  | 1550s  | 1552s | 1554s | 1552s  |         | 1558s   | 1551s  | v CC, τ CH                                                                           |
|        |        | 1514w | 1513w |        |         | 1519w   |        | δ OH, δ CH, v CC                                                                     |
| 1499m  | 1498m  | 1493m | 1491m | 1492m  | 1499s   | 1499m   | 1496m  | v <sub>s</sub> CC, v <sub>s</sub> CN, δ CH                                           |
| 1472m  | 1470w  | 1472m | 1472w | 1472m  | 1465s   | 1465m   | 1470m  | α δ OH                                                                               |
|        |        |       |       |        | 1430w   |         |        | δ OH                                                                                 |
| 1424w  | 1418w  | 1418s | 1419s | 1420s  |         | 1423s   | 1416s  | v CC, δ OH, v CH                                                                     |
| 1400s  | 1397s  | 1399s | 1401s | 1399s  | 1394m   | 1401s   | 1397s  | v CO, δ OH                                                                           |
| 1381m  | 1376m  | 1380m | 1377w | 1377m  | 1375s   | 1375m   | 1377m  | γ OH, δ CH, v CC, v <sub>as</sub><br>ring                                            |
| 1316s  |        |       |       |        | 1323s   |         |        | v CN                                                                                 |
| 1300s  | 1297s  | 1300s | 1299s | 1301s  |         | 1309s   | 1301s  | v CN                                                                                 |
|        |        |       | 1284m |        |         | 1294m   | 1281m  | v CO, v CN, v <sub>as</sub> ring                                                     |
| 1270s  | 1269w  | 1271s | 1270m | 1268m  | 1268m   | 1274m   | 1264m  | v CO, v CN, v <sub>as</sub> ring                                                     |
|        |        |       |       |        | 1232m   |         |        | v CO, v CN, v <sub>as</sub> ring                                                     |
| 1220m  | 1219w  | 1220m | 1226w | 1221m  |         |         | 1217m  | v CO, v CH                                                                           |
| 1204m  | 1198w  | 1204m | 1202m | 1202m  |         | 1205m   |        | v CC, v CH                                                                           |
|        |        | 1172w |       |        |         | 1172w   | 1192m  | δ CH                                                                                 |
| 1136w  | 1141w  | 1138w | 1143w | 1147w  |         | 1144m   | 1144m  | δ CH, δ OH                                                                           |
| 1099s  | 1094s  | 1093s | 1093s | 1094s  | 1107s   | 1098s   | 1093s  | δ CH, v <sub>s</sub> CN, v <sub>s</sub> ring,<br>δ OH                                |
| 1058m  | 1058w  | 1058w | 1058w | 1058m  |         | 1062w   | 1059m  | γ CH, v CC                                                                           |
| 998w   |        | 998w  | 998w  | 996w   |         | 998w    |        | δ CH                                                                                 |
|        | 990w   |       | 984w  |        |         | 985w    | 987w   | ω CH                                                                                 |
|        |        | 977w  |       |        |         |         | 968w   | ω CH                                                                                 |
| 904w   | 907w   |       | 905w  | 907w   |         |         |        | ω CH                                                                                 |
| 885m   | 886m   | 888s  | 886m  | 886m   | 881w    | 887w    | 887m   | γ OH, γ CH                                                                           |
| 822s   | 822s   | 823s  | 819s  | 819s   | 827s    | 825s    | 816s   | v <sub>s</sub> CN, γ CH, ω CH,<br>v <sub>s</sub> ring, v <sub>as</sub> ring,<br>v CC |
|        |        | 804s  | 809s  |        |         |         |        | v CC                                                                                 |
| 802w   | 801w   | 801s  | 801m  | 802m   | 805m    | 802m    | 801m   | v CC                                                                                 |
| 783w   | 780w   | 766s  | 776w  | 775m   | 786m    | 785m    | 773m   | γ CH                                                                                 |
| 755s   | 759s   | 756s  | 758s  | 757s   | 752s    | 761m    | 761s   | γ CH                                                                                 |
|        |        |       |       |        | 745s    | 747w    |        | v <sub>as</sub> ring, T <sub>s</sub> ring, T<br>OH                                   |
| 711m   | 711w   | 711m  | 711w  | 712m   |         | 711w    | 711m   | γ CH                                                                                 |
|        |        |       | 633w  |        | 645w    |         |        | v CN                                                                                 |
| 623w   | 617w   | 616mb | 611mb | 615w   |         | 618w    | 615m   | γ CH                                                                                 |
| 576w   | 576w   | 574m  | 574m  | 576m   |         | 577m    | 577m   | δ ring, T ring                                                                       |
| 540m   | 537w   | 538m  | 538m  | 538m   | 538m    | 539w    | 539w   | δ ring, α CO, T ring                                                                 |
| 488m   | 485m   | 488m  | 489m  | 488m   |         | 490w    | 490m   | vCC, ωCO                                                                             |
|        | 470w   |       | 470w  | 470w   | 475w    |         | 466w   | γ CO                                                                                 |
|        | 464w   |       |       | 455w   | 444w    |         | 460w   | γ CO, T ring                                                                         |
|        | 441w   |       |       | 438w   | 432w    |         |        | γ CO                                                                                 |
| 413m   | 419m   |       | 413m  | 413m   | 418w    | 411m    |        | δ ring                                                                               |
|        | 409m   | 405m  | 408m  |        | 406w    |         | 404m   | δ ring                                                                               |

Table S5. *continued*

| CoBr   | FeBr   | ZnBr  | CdBr  | SnBr   | Assignment                                                                   |
|--------|--------|-------|-------|--------|------------------------------------------------------------------------------|
| 3411sb | 3461sb | 3455s | 3461s | 3508sb | vOH                                                                          |
| 3314sb |        |       |       | 3451sb | vOH                                                                          |
| 1633s  | 1628s  | 1635s | 1634s | 1634s  | v CO, v <sub>s</sub> CC, v <sub>as</sub> ring,<br>δ COH                      |
| 1605s  | 1599s  | 1605s | 1606s | 1604s  | v <sub>s</sub> CC, v <sub>s</sub> CN, δ NH                                   |
| 1592s  | 1591s  | 1593s | 1591m | 1591s  | v CN, v <sub>s</sub> CC, v CH                                                |
| 1552s  | 1548s  | 1554s | 1552s | 1556s  | v CC, τ CH                                                                   |
| 1497w  | 1494m  | 1490m | 1492w |        | v <sub>s</sub> CC, v <sub>s</sub> CN, δ CH                                   |
| 1471m  | 1471w  | 1471w | 1471w | 1472w  | α δ OH                                                                       |
|        | 1417s  | 1418s | 1418m | 1421s  | v CC, δ OH, v CH                                                             |
| 1401s  | 1394s  | 1401s | 1401s | 1401s  | v CO, δ OH                                                                   |
| 1382s  | 1371m  | 1374w | 1376w | 1374w  | γ OH, δ CH, v CC,<br>v <sub>as</sub> ring                                    |
| 1317s  |        |       |       |        | v CN                                                                         |
| 1298s  | 1296s  | 1299s | 1300s | 1308s  | v CN                                                                         |
|        | 1282s  | 1282m | 1284w | 1289m  | v CO, v CN, v <sub>as</sub> ring                                             |
| 1270s  | 1269m  |       |       | 1273w  | v CO, v CN, v <sub>as</sub> ring                                             |
| 1239w  |        |       |       |        | v CO, v CN, v <sub>as</sub> ring                                             |
| 1218s  | 1218w  | 1225w | 1223w |        | v CO, v CH                                                                   |
| 1202m  | 1195w  | 1201m | 1200w | 1204w  | v CC, vCH                                                                    |
|        | 1174w  | 1167w |       | 1170w  | δ CH                                                                         |
| 1136w  | 1141w  | 1142w | 1140w | 1142m  | δ CH, δ OH                                                                   |
| 1098s  | 1092s  | 1093s | 1093s | 1097s  | δ CH, v <sub>s</sub> CN, v <sub>s</sub> ring,<br>δ OH                        |
| 1058m  | 1056w  | 1057w | 1059w | 1062w  | γ CH, v CC                                                                   |
| 997m   |        |       |       | 997w   | δ CH                                                                         |
|        | 986w   | 984w  | 984w  |        | ω CH                                                                         |
|        |        |       |       | 933    | ω CH                                                                         |
| 906w   | 903w   | 903w  | 904w  |        | ω CH                                                                         |
| 887m   | 885m   | 890m  | 889m  | 887w   | γ OH, γ CH                                                                   |
| 823s   | 821s   | 818s  | 819m  | 824s   | v <sub>s</sub> CN, γ CH, ω CH,<br>v <sub>s</sub> ring, v <sub>as</sub> ring, |
|        |        | 809s  | 809m  |        |                                                                              |
| 802w   | 800m   | 801s  | 802m  | 801m   | N CC                                                                         |
| 783w   |        |       |       | 783w   | ω CH                                                                         |
|        | 777m   | 776m  | 773m  |        |                                                                              |
| 754s   | 759s   | 759s  | 759s  | 763m   | γ CH                                                                         |
| 711m   | 710w   | 711m  | 710w  | 712m   | γ CH                                                                         |
| 621m   | 617w   |       |       | 617m   | γ CH                                                                         |
|        |        | 606mb | 602wb | 594wb  | γ CH                                                                         |
| 574m   | 575m   | 574m  | 574m  | 575m   | δ ring, T ring                                                               |
| 542w   | 535m   | 537m  | 538w  | 539w   | δ ring, α CO, T ring                                                         |
| 488w   | 485m   | 487m  | 487w  | 489w   | vCC, ωCO                                                                     |
| 472w   |        |       | 474w  |        | γ CO                                                                         |
| 459w   | 458w   | 461w  | 462w  | 464w   | γ CO, T ring                                                                 |
| 420w   | 423w   |       |       |        | γ CO                                                                         |
| 410m   |        | 415m  | 417m  | 419w   | δ ring                                                                       |
|        | 403w   | 409m  | 408m  | 407w   | δ ring                                                                       |

Table S6. The most important electronic transitions for the compounds containing the open-shell coordination centers. H letter indicates HOMO, L - LUMO,  $\alpha$  -  $\alpha$  orbitals,  $\beta$  -  $\beta$  orbitals, and +/- (number) represents subsequent orbitals below HOMO and above LUMO, respectively.

|              |      |      |      |      | $\lambda_{\max}$ (nm) |        |        |        |        | The most important orbitals involved in electronic transitions                                                                                                                                                                    |                                                                                                                                                                                                                                                      | Character of transition |
|--------------|------|------|------|------|-----------------------|--------|--------|--------|--------|-----------------------------------------------------------------------------------------------------------------------------------------------------------------------------------------------------------------------------------|------------------------------------------------------------------------------------------------------------------------------------------------------------------------------------------------------------------------------------------------------|-------------------------|
| Experimental |      |      |      |      | Calculated            |        |        |        |        |                                                                                                                                                                                                                                   |                                                                                                                                                                                                                                                      |                         |
| FeCl         | CoCl | CuCl | FeBr | CoBr | FeCl                  | CoCl   | CuCl   | FeBr   | CoBr   |                                                                                                                                                                                                                                   |                                                                                                                                                                                                                                                      |                         |
|              |      |      |      |      | 225.13                | 224.54 |        | 232.28 | 231.05 | (FeCl) $\alpha$ H-16 $\rightarrow\alpha$ L+5<br>(CoCl) $\beta$ H-14 $\rightarrow\beta$ L+2<br>(FeBr) $\beta$ H-17 $\rightarrow\beta$ L+3<br>(CoBr) $\alpha$ H-26 $\rightarrow\alpha$ L+6                                          | (FeCl) n(Cl) $\pi$ (8hq) $\rightarrow\pi^*$ (8hq)<br>(CoCl) $\pi$ (8hq)d(Co) $\rightarrow\pi^*$ (8hq)<br>(FeBr) $\sigma$ (Fe-Br) $\rightarrow n$ (Br) $\pi^*$ (8hq)d(Fe)<br>(CoBr) n(8hq-OH) $\pi$ (8hq) $\rightarrow\pi^*$ (8hq)                    |                         |
|              |      |      |      |      | 228.16                | 225.81 |        | 233.74 |        | (FeCl) $\beta$ H-18 $\rightarrow\beta$ L+1<br>(CoCl) $\beta$ H-19 $\rightarrow\beta$ L+1<br>(FeBr) $\beta$ H-11 $\rightarrow\beta$ L+7                                                                                            | (FeCl) n(Cl)d(Fe) $\rightarrow\pi^*$ (8hq)<br>(CoCl) $\sigma$ (Co-Cl) $\pi$ (8hq) $\rightarrow\pi^*$ (8hq)<br>(FeBr) n(8hq-OH) $\pi$ (8hq) $\rightarrow\pi^*$ (8hq)                                                                                  |                         |
|              |      |      |      |      | 232.36                | 228.18 | 210.72 | 241.97 |        | (FeCl) $\beta$ H-12 $\rightarrow\beta$ L+5<br>(CoCl) $\beta$ H-14 $\rightarrow\beta$ L+2<br>(CuCl) $\beta$ H-21 $\rightarrow\beta$ L+1<br>(FeBr) $\alpha$ H-16 $\rightarrow\alpha$ L+7                                            | (FeCl, CuCl, FeBr) $\pi$ (8hq) $\rightarrow\pi^*$ (8hq)<br>(CoCl) $\pi$ (8hq)d(Co) $\rightarrow\pi^*$ (8hq)                                                                                                                                          |                         |
|              |      |      |      |      | 234.21                | 231.23 | 226.55 | 244.56 |        | (FeCl) $\alpha$ H-12 $\rightarrow\alpha$ L+5<br>(CoCl) $\alpha$ H-16 $\rightarrow\alpha$ L+3<br>(CuCl) $\alpha$ H-1 $\rightarrow\alpha$ L+9<br>(FeBr) $\alpha$ H-18 $\rightarrow\alpha$ L+1                                       | (FeCl) n(8hq-OH)n(Cl) $\pi$ (8hq)d(Fe) $\rightarrow\pi^*$ (8hq)<br>(CoCl) $\sigma$ (Co-Cl) $\rightarrow n$ (Cl)d(Co)<br>(CuCl) n(Cl)d(Cu) $\rightarrow\pi^*$ (8hq)<br>(FeBr) $\pi$ (8hq) $\rightarrow\pi^*$ (8hq)                                    |                         |
| 236          | 235  | 240  | 233  | 235  | 237.01                | 232.86 | 226.78 | 248.08 |        | (FeCl) $\alpha$ H-19 $\rightarrow\alpha$ L<br>(CoCl) $\beta$ H-18 $\rightarrow\beta$ L+5<br>(CuCl) $\alpha$ H-1 $\rightarrow\alpha$ L+9<br>(FeBr) $\beta$ H-19 $\rightarrow\beta$ L+6                                             | (FeCl) $\pi$ (8hq) $\rightarrow\pi^*$ (8hq)<br>(CoCl, FeBr) n(Cl, Br)d(Co, Fe) $\rightarrow n$ (Cl, Br)d(Co, Fe)<br>(CuCl) n(Cl)d(Cu) $\rightarrow\pi^*$ (8hq)                                                                                       |                         |
|              |      |      |      |      | 242.95                | 240.56 | 233.41 | 251.64 |        | (FeCl) $\beta$ H $\rightarrow\beta$ L+14<br>(CoCl) $\alpha$ H-12 $\rightarrow\alpha$ L+4<br>(CuCl) $\beta$ H-9 $\rightarrow\beta$ L+5<br>(FeBr) $\alpha$ H-17 $\rightarrow\alpha$ L+4                                             | (FeCl) n(Cl-) $\pi$ (8hq) $\rightarrow\pi^*$ (8hq)<br>(CoCl) $\pi$ (8hq) $\rightarrow\pi^*$ (8hq)d(Co)<br>(CuCl) n(Cl) $\pi$ (8hq)d(Cu) $\rightarrow\pi^*$ (8hq)<br>(FeBr) $\sigma$ (Fe-Br) $\rightarrow n$ (Br)d(Fe)                                |                         |
|              |      |      |      |      | 285.29                | 260.26 | 235.17 | 259.27 | 258.64 | (FeCl) $\beta$ H-12 $\rightarrow\beta$ L+3<br>(CoCl) $\beta$ H-11 $\rightarrow\beta$ L+2<br>(CuCl) $\alpha$ H-21 $\rightarrow\alpha$ L<br>(FeBr) $\beta$ H-7 $\rightarrow\beta$ L+8<br>(CoBr) $\beta$ H-24 $\rightarrow\beta$ L+6 | (FeCl) n(Cl)d(Fe) $\rightarrow n$ (Cl)d(Fe)<br>(CoCl, FeBr) n(Cl, Br)d(Co, Fe) $\rightarrow\pi^*$ (8hq)<br>(CuCl) $\sigma$ (Cu-Cl) $\pi$ (8hq) $\rightarrow n$ (Cl) $\pi^*$ (8hq)d(Cu)<br>(CoBr) $\sigma$ (Co-Br)n(Br)d(Co) $\rightarrow\pi^*$ (8hq) |                         |
|              |      |      |      |      |                       | 275.32 | 257.42 |        | 276.73 | (CoCl) $\alpha$ H $\rightarrow\alpha$ L+10<br>(CuCl) $\alpha$ H-10 $\rightarrow\alpha$ L+3<br>(CoBr) $\alpha$ H-36 $\rightarrow\alpha$ L+2                                                                                        | (CoCl, CuCl) n(Cl) $\pi$ (8hq)d(Co, Cu) $\rightarrow\pi^*$ (8hq)<br>(CoBr) $\sigma$ (Co-Br) $\rightarrow n$ (Br)d(Co)                                                                                                                                |                         |
|              |      |      |      |      |                       | 300.86 |        |        |        | (CoCl) $\alpha$ H-10 $\rightarrow\alpha$ L+3                                                                                                                                                                                      | (CoCl) $\sigma$ (Co-Cl) $\rightarrow n$ (Cl)d(Co)                                                                                                                                                                                                    |                         |
| 318          | 323  | 336  | 313  | 322  | 316.36                | 324.18 | 296.93 | 294.18 | 323.13 | (FeCl) $\alpha$ H-10 $\rightarrow\alpha$ L+1<br>(CoCl) $\alpha$ H-16 $\rightarrow\alpha$ L<br>(CuCl) $\beta$ H-4 $\rightarrow\beta$ L+5                                                                                           | (FeCl, CuCl) n(Cl)d(Fe, Cu) $\rightarrow\pi^*$ (8hq)<br>(CoCl) $\sigma$ (Co-Cl) $\rightarrow n$ (Cl) $\pi^*$ (8hq)d(Co)<br>(FeBr, CoBr) n(Br)d(Fe, Co) $\rightarrow n$ (Br)d(Fe, Co)                                                                 |                         |

|              |      |      |      |      | $\lambda_{\text{max}}$ (nm) |        |        |        |        | The most important orbitals<br>involved in electronic<br>transitions                                                                                                                                                                                                                     | Character of transition                                                                                                                                                                                                                                                                                                                               |
|--------------|------|------|------|------|-----------------------------|--------|--------|--------|--------|------------------------------------------------------------------------------------------------------------------------------------------------------------------------------------------------------------------------------------------------------------------------------------------|-------------------------------------------------------------------------------------------------------------------------------------------------------------------------------------------------------------------------------------------------------------------------------------------------------------------------------------------------------|
| Experimental |      |      |      |      | Calculated                  |        |        |        |        |                                                                                                                                                                                                                                                                                          |                                                                                                                                                                                                                                                                                                                                                       |
| FeCl         | CoCl | CuCl | FeBr | CoBr | FeCl                        | CoCl   | CuCl   | FeBr   | CoBr   |                                                                                                                                                                                                                                                                                          |                                                                                                                                                                                                                                                                                                                                                       |
|              |      |      |      |      |                             |        |        |        |        | (FeBr) $\alpha\text{H-21} \rightarrow \alpha\text{L+3}$<br>(CoBr) $\beta\text{H-42} \rightarrow \beta\text{L+1}$                                                                                                                                                                         |                                                                                                                                                                                                                                                                                                                                                       |
|              |      |      |      |      | 333.73                      | 339.08 | 301.16 | 311.22 |        | (FeCl) $\beta\text{H-3} \rightarrow \beta\text{L+5}$<br>(CoCl) $\beta\text{H-12} \rightarrow \beta\text{L}$<br>(CuCl) $\beta\text{H-8} \rightarrow \beta\text{L+4}$<br>(FeBr) $\alpha\text{H-10} \rightarrow \alpha\text{L+2}$                                                           | (FeCl, FeBr) $n(\text{Cl, Br})d(\text{Fe}) \rightarrow \pi^*(8\text{hq})$<br>(CoCl) $\pi(8\text{hq}) \rightarrow \pi^*(8\text{hq})$<br>(CuCl) $\sigma(\text{Cu-Cl})n(\text{Cl})d(\text{Cu}) \rightarrow n(\text{Cl})d(\text{Cu})\pi^*(8\text{hq})$                                                                                                    |
|              |      |      |      |      | 377.36                      |        | 346.24 | 312.72 | 363.8  | (FeCl) $\beta\text{H-7} \rightarrow \beta\text{L+3}$<br>(CuCl) $\beta\text{H-13} \rightarrow \beta\text{L+1}$<br>(FeBr) $\beta\text{H-14} \rightarrow \beta\text{L+3}$<br>(CoBr) $\beta\text{H-29} \rightarrow \beta\text{L+2}$                                                          | (FeCl, CoBr) $n(\text{Cl, Br})d(\text{Fe, Co}) \rightarrow n(\text{Cl, Br})d(\text{Fe, Co})$<br>(CuCl) $\sigma(\text{Cu-Cl})\pi(8\text{hq}) \rightarrow \pi^*(8\text{hq})$<br>(FeBr) $n(\text{Br})d(\text{Fe}) \rightarrow n(\text{Br})\pi^*(8\text{hq})d(\text{Fe})$                                                                                 |
|              |      |      |      |      | 396.92                      |        |        | 315.35 |        | (FeCl) $\beta\text{H-5} \rightarrow \beta\text{L+4}$<br>(FeBr) $\beta\text{H-12} \rightarrow \beta\text{L+5}$                                                                                                                                                                            | (FeCl) $n(\text{Cl})d(\text{Fe}) \rightarrow n(\text{Cl})d(\text{Fe})$<br>(FeBr) $n(\text{Br})d(\text{Fe}) \rightarrow n(\text{Br})\pi^*(8\text{hq})d(\text{Fe})$                                                                                                                                                                                     |
|              |      |      |      |      | 418.1                       | 411.92 | 412.27 | 359.81 |        | (FeCl, CoCl) $\beta\text{H-6} \rightarrow \beta\text{L+1}$<br>(CuCl) $\alpha\text{H-5} \rightarrow \alpha\text{L+2}$<br>(FeBr) $\alpha\text{H-14} \rightarrow \alpha\text{L+4}$                                                                                                          | (FeCl, CuCl) $n(\text{Cl})d(\text{Fe, Cu}) \rightarrow \pi^*(8\text{hq})$<br>(CoCl) $n(\text{Cl})\pi(8\text{hq}) \rightarrow \pi^*(8\text{hq})$<br>(FeBr) $\sigma(\text{Fe-Br}) \rightarrow n(\text{Br})d(\text{Fe})$                                                                                                                                 |
| 420          | 412  | 411  | 375  | 406  |                             |        |        | 370.96 |        | (FeBr) $\alpha\text{H-14} \rightarrow \alpha\text{L+3}$                                                                                                                                                                                                                                  | (FeBr) $\sigma(\text{Fe-Br}) \rightarrow n(\text{Br})d(\text{Fe})$                                                                                                                                                                                                                                                                                    |
|              |      |      |      |      |                             |        |        | 375.03 | 392.8  | (FeBr) $\beta\text{H-7} \rightarrow \beta\text{L+6}$<br>(CoBr) $\beta\text{H-42} \rightarrow \beta\text{L+1}$                                                                                                                                                                            | (FeBr, CoBr) $n(\text{Br})d(\text{Fe, Co}) \rightarrow n(\text{Br})d(\text{Fe, Co})$                                                                                                                                                                                                                                                                  |
|              |      |      |      |      |                             |        |        | 376.34 |        | (FeBr) $\alpha\text{H-2} \rightarrow \alpha\text{L+5}$                                                                                                                                                                                                                                   | (FeBr) $n(\text{Br})d(\text{Fe}) \rightarrow \pi^*(8\text{hq})d(\text{Fe})$                                                                                                                                                                                                                                                                           |
|              |      |      |      |      |                             |        |        | 402.01 |        | (FeBr) $\alpha\text{H-10} \rightarrow \alpha\text{L+1}$                                                                                                                                                                                                                                  | (FeBr) $n(\text{Br})d(\text{Fe}) \rightarrow \pi^*(8\text{hq})$                                                                                                                                                                                                                                                                                       |
|              |      |      |      |      |                             |        |        |        |        | (FeCl) $\beta\text{H-3} \rightarrow \beta\text{L+1}$<br>(CoCl) $\alpha\text{H} \rightarrow \alpha\text{L+5}$<br>(CuCl) $\alpha\text{H} \rightarrow \alpha\text{L+4}$<br>(FeBr) $\beta\text{H-4} \rightarrow \beta\text{L+2}$                                                             | (FeCl) $n(\text{Cl})d(\text{Fe}) \rightarrow \pi^*(8\text{hq})$<br>(CoCl) $\pi(8\text{hq}) \rightarrow \pi^*(8\text{hq})$<br>(CuCl) $n(\text{Cl})\pi(8\text{hq})d(\text{Cu}) \rightarrow \pi^*(8\text{hq})$<br>(FeBr) $n(\text{Br})n(8\text{hq-OH})d(\text{Fe}) \rightarrow \pi^*(8\text{hq})$                                                        |
| 537          | 520  | 502  | 460  | 549  | 510.04                      |        | 496.13 | 500.53 | 452.33 | (CoCl) $\alpha\text{H-10} \rightarrow \alpha\text{L}$<br>(CuCl) $\alpha\text{H-9} \rightarrow \alpha\text{L}$<br>(FeBr) $\alpha\text{H-15} \rightarrow \alpha\text{L}$                                                                                                                   | (CoCl) $\sigma(\text{Co-Cl}) \rightarrow n(\text{Cl})\pi^*(8\text{hq})d(\text{Co})$<br>(CuCl) $\sigma(\text{Cu-Cl})n(\text{Cl})d(\text{Cu}) \rightarrow n(\text{Cl})\pi^*(8\text{hq})d(\text{Cu})$<br>(FeBr) $\pi(8\text{hq}) \rightarrow \pi^*(8\text{hq})$                                                                                          |
|              |      |      |      |      |                             |        | 505.34 | 506.53 | 464.17 | (CoCl) $\beta\text{H-4} \rightarrow \beta\text{L}$<br>(FeBr) $\beta\text{H-3} \rightarrow \beta\text{L+3}$                                                                                                                                                                               | (CoCl) $n(\text{Cl})d(\text{Co}) \rightarrow \pi^*(8\text{hq})$<br>(FeBr) $n(\text{Br})d(\text{Fe}) \rightarrow n(\text{Br})\pi^*(8\text{hq})d(\text{Fe})$                                                                                                                                                                                            |
|              |      |      |      |      |                             |        | 516.94 |        | 466.02 | (FeCl) $\beta\text{H-3} \rightarrow \beta\text{L+6}$<br>(CoCl) $\alpha\text{H-4} \rightarrow \alpha\text{L+1}$<br>(CuCl) $\alpha\text{H-9} \rightarrow \alpha\text{L}$<br>(FeBr) $\alpha\text{H-8} \rightarrow \alpha\text{L+3}$<br>(CoBr) $\beta\text{H-6} \rightarrow \beta\text{L+4}$ | (FeCl, FeBr) $n(\text{Cl, Br})d(\text{Fe}) \rightarrow n(\text{Cl, Br})d(\text{Fe})$<br>(CoCl) $n(\text{Cl})d(\text{Co}) \rightarrow \pi^*(8\text{hq})d(\text{Co})$<br>(CuCl) $\sigma(\text{Cu-Cl})n(\text{Cl})d(\text{Cu}) \rightarrow n(\text{Cl})\pi^*(8\text{hq})d(\text{Cu})$<br>(CoBr) $d(\text{Co})n(\text{Br}) \rightarrow \pi^*(8\text{hq})$ |
| 619          | 624  | 576  | 542  | 661  | 618.63                      | 625.77 | 579.45 | 540.05 | 673.1  | (CoCl) $\alpha\text{H-7} \rightarrow \alpha\text{L}$                                                                                                                                                                                                                                     | (CoCl) $\sigma(\text{Co-Cl})n(\text{Cl})d(\text{Co}) \rightarrow n(\text{Cl})\pi^*(8\text{hq})d(\text{Co})$                                                                                                                                                                                                                                           |
|              |      |      |      |      |                             | 647.73 |        | 541.7  |        | (FeBr) $\alpha\text{H-8} \rightarrow \alpha\text{L+1}$                                                                                                                                                                                                                                   | (FeBr) $\pi(8\text{hq}) \rightarrow \pi^*(8\text{hq})$                                                                                                                                                                                                                                                                                                |
|              |      |      |      |      |                             |        |        | 565.62 |        |                                                                                                                                                                                                                                                                                          |                                                                                                                                                                                                                                                                                                                                                       |



| $\lambda_{\max}$ (nm) |      |      |      |      |            |        |        |        |      | The most important orbitals involved in electronic transitions                                                                                                                   | Character of transition                                                                                                                                       |
|-----------------------|------|------|------|------|------------|--------|--------|--------|------|----------------------------------------------------------------------------------------------------------------------------------------------------------------------------------|---------------------------------------------------------------------------------------------------------------------------------------------------------------|
| Experimental          |      |      |      |      | Calculated |        |        |        |      |                                                                                                                                                                                  |                                                                                                                                                               |
| FeCl                  | CoCl | CuCl | FeBr | CoBr | FeCl       | CoCl   | CuCl   | FeBr   | CoBr |                                                                                                                                                                                  |                                                                                                                                                               |
| 693                   | 694  | 720  | 632  | 734  | 690.95     | 671.8  | 739.69 | 630.41 |      | (FeCl) $\beta H \rightarrow \beta L+3$<br>(CoCl) $\alpha H-3 \rightarrow \alpha L+1$<br>(CuCl) $\alpha H-6 \rightarrow \alpha L+1$<br>(FeBr) $\alpha H-3 \rightarrow \alpha L+1$ | (FeCl) $n(Cl)-\pi(8hq) \rightarrow n(Cl)d(Fe)$<br>(CoCl, CuCl) $n(Cl)d(Co, Cu) \rightarrow \pi^*(8hq)d(Co, Cu)$<br>(FeBr) $n(Br)d(Fe) \rightarrow \pi^*(8hq)$ |
|                       |      |      |      |      |            |        |        | 636.82 |      | (FeBr) $\beta H-3 \rightarrow \beta L+1$                                                                                                                                         | (FeBr) $n(Br)d(Fe) \rightarrow \pi^*(8hq)$                                                                                                                    |
|                       |      |      | 716  |      |            |        |        | 728.98 |      | (FeBr) $\beta H \rightarrow \beta L+6$                                                                                                                                           | (FeBr) $n(Br)d(Fe) \rightarrow n(Br)d(Fe)$                                                                                                                    |
| 753                   | 788  | 795  | 795  |      | 729.16     | 768.17 | 796.52 | 795.18 |      | (FeCl) $\alpha H-3 \rightarrow \alpha L$<br>(CoCl) $\alpha H \rightarrow \alpha L+4$<br>(CuCl) $\beta H \rightarrow \beta L+1$<br>(FeBr) $\alpha H \rightarrow \alpha L+1$       | (FeCl, CuCl) $n(Cl)d(Fe, Cu) \rightarrow \pi^*(8hq)$<br>(CoCl) $\pi^*(8hq) \rightarrow \pi^*(8hq)d(Co)$<br>(FeBr) $n(Br)d(Fe) \rightarrow \pi^*(8hq)$         |
|                       |      |      |      |      | 761.28     | 810.63 |        |        |      | (FeCl) $\alpha H-1 \rightarrow \alpha L+1$<br>(CoCl) $\alpha H-5 \rightarrow \alpha L$                                                                                           | (FeCl) $n(Cl)- \rightarrow \pi^*(8hq)$<br>(CoCl) $n(Cl)d(Co) \rightarrow \pi^*(8hq)n(Cl)d(Co)$                                                                |

Used abbreviations: d – d orbital, n – non-bonding orbital,  $\sigma$  -  $\sigma$  orbital,  $\pi$  -  $\pi$  orbital, \* - an antibonding orbital.

Table S7. The most important electronic transitions for the chloride compounds containing the closed-shell coordination centers. H letter indicates HOMO, L - LUMO,  $\alpha$  –  $\alpha$  orbitals,  $\beta$  -  $\beta$  orbitals, and +/- (number) represents subsequent orbitals below HOMO and above LUMO, respectively.

| $\lambda_{\max}$ (nm) |      |         |         |         |         |      |      |            |        |         |         |         |         |        |      | The most important orbitals involved in electronic transitions | Character of transition                                                                                                                                                                                                                               |
|-----------------------|------|---------|---------|---------|---------|------|------|------------|--------|---------|---------|---------|---------|--------|------|----------------------------------------------------------------|-------------------------------------------------------------------------------------------------------------------------------------------------------------------------------------------------------------------------------------------------------|
| Experimental          |      |         |         |         |         |      |      | Calculated |        |         |         |         |         |        |      |                                                                |                                                                                                                                                                                                                                                       |
| ZnCl                  | CdCl | SnCl(2) | SnCl(1) | HgCl(1) | HgCl(2) | PbCl | BiCl | ZnCl       | CdCl   | SnCl(2) | SnCl(1) | HgCl(1) | HgCl(2) | PbCl   | BiCl |                                                                |                                                                                                                                                                                                                                                       |
| 248                   | 250  | 250     | 238     | 250     | 239     | 270  | 238  | 219.26     | 225.31 | 228.05  |         | 209.73  |         | 229.08 |      |                                                                | (ZnCl, PbCl) $\pi(8hq) \rightarrow n(Cl)\pi^*(8hq)$<br>(CdCl) $\sigma(8hq)-NH)n(Cl)d(Cd) \rightarrow \sigma^*(8hq)$<br>(SnCl(2)) $n(Cl)n(8hq-OH)n(H_2O) \rightarrow \pi/\pi^*(8hq)$<br>(HgCl(1)) $H-6 \rightarrow L+9$<br>(PbCl) $H-41 \rightarrow L$ |
|                       |      |         |         |         |         |      |      | 225.57     | 225.98 | 246.02  |         | 221.23  |         | 246.49 |      |                                                                | (ZnCl) $H-16 \rightarrow L+1$<br>(CdCl) $H-11 \rightarrow L+4$<br>(SnCl(2)) $H-14 \rightarrow L+5$<br>(HgCl(1)) $H-16 \rightarrow L$<br>(PbCl) $H-30 \rightarrow L+5$                                                                                 |

| $\lambda_{\max}$ (nm) |      |         |         |         |         |      |      |            |        |         |         |                  |                            |        |        | The most important orbitals involved in electronic transitions | Character of transition                                                                                                                                                                                                                                                   |                                                                                                                                                                                                                                                                                                                                                                                                     |
|-----------------------|------|---------|---------|---------|---------|------|------|------------|--------|---------|---------|------------------|----------------------------|--------|--------|----------------------------------------------------------------|---------------------------------------------------------------------------------------------------------------------------------------------------------------------------------------------------------------------------------------------------------------------------|-----------------------------------------------------------------------------------------------------------------------------------------------------------------------------------------------------------------------------------------------------------------------------------------------------------------------------------------------------------------------------------------------------|
| Experimental          |      |         |         |         |         |      |      | Calculated |        |         |         |                  |                            |        |        |                                                                |                                                                                                                                                                                                                                                                           |                                                                                                                                                                                                                                                                                                                                                                                                     |
| ZnCl                  | CdCl | SnCl(2) | SnCl(1) | HgCl(1) | HgCl(2) | PbCl | BiCl | ZnCl       | CdCl   | SnCl(2) | SnCl(1) | HgCl(1)          | HgCl(2)                    | PbCl   | BiCl   |                                                                |                                                                                                                                                                                                                                                                           |                                                                                                                                                                                                                                                                                                                                                                                                     |
|                       |      |         |         |         |         |      |      |            |        |         |         |                  |                            |        |        |                                                                | (SnCl(2), PbCl) $n(\text{Cl}) \rightarrow \pi/\pi^*(8\text{hq})$<br>(HgCl(1)) $\pi(8\text{hq}) \rightarrow n(\text{Cl})\pi^*(8\text{hq})$                                                                                                                                 |                                                                                                                                                                                                                                                                                                                                                                                                     |
|                       |      |         |         |         |         |      |      | 226.76     | 228.15 | 281.07  |         | 227.94           | 222.9<br>*223.34<br>230.67 | 273.19 | 241.83 |                                                                | (ZnCl) H-11 $\rightarrow$ L+4<br>(CdCl, HgCl(1))<br>H-14 $\rightarrow$ L+2<br>(SnCl(2), BiCl)<br>H-28 $\rightarrow$ L+1<br>(PbCl) H-19 $\rightarrow$ L+11<br>(HgCl(2)) H-34 $\rightarrow$ L+3<br>*(HgCl(2))<br>H-6 $\rightarrow$ L+13<br>(HgCl(2)) H-24 $\rightarrow$ L+7 | $\pi(8\text{hq}) \rightarrow \pi^*(8\text{hq})$<br>(ZnCl, CdCl, HgCl(1), HgCl(2))<br>(SnCl(2)) $\pi(8\text{hq}) \rightarrow \pi/\pi^*(8\text{hq})$<br>(PbCl) $n(\text{Cl})d(\text{Pb}) \rightarrow \sigma^*(\text{Pb-Cl})$<br>(BiCl) $n(8\text{hq-OH})\pi(8\text{hq}) \rightarrow \pi/\pi^*(8\text{hq})$<br>*(HgCl(2)) $n(\text{Cl}) \rightarrow \sigma^*(\text{Hg-Cl})$                            |
|                       |      |         |         |         |         |      |      | 229.88     | 242.62 |         | 213.21  | 231.19<br>242.55 |                            |        | 284.83 |                                                                | (ZnCl, HgCl(1))<br>H-14 $\rightarrow$ L+2<br>(CdCl, HgCl(1))<br>H-13 $\rightarrow$ L+3<br>(BiCl) H-30 $\rightarrow$ L<br>(SnCl(1)) H-20 $\rightarrow$ L+3                                                                                                                 | (ZnCl, CdCl, SnCl(1), HgCl(1))<br>$\pi(8\text{hq}) \rightarrow \pi^*(8\text{hq})$<br>(BiCl) $\pi(8\text{hq}) \rightarrow \sigma^*(\text{Bi-Cl})\pi/\pi^*(8\text{hq})$                                                                                                                                                                                                                               |
|                       |      |         |         |         |         |      |      | 243.92     | 273.05 |         |         |                  | 231.21                     |        |        |                                                                | (ZnCl) H-12 $\rightarrow$ L+3<br>(HgCl(2)) H-19 $\rightarrow$ L+7                                                                                                                                                                                                         | (ZnCl) $\sigma(\text{Zn-Cl}) \rightarrow \pi^*(8\text{hq})$<br>(HgCl(2)) $n(\text{Cl}) \rightarrow \pi^*(8\text{hq})$                                                                                                                                                                                                                                                                               |
|                       |      |         |         |         |         |      |      | 274.21     |        |         | 227.13  | 274.08           | 274.84                     |        |        |                                                                | (ZnCl) H-15 $\rightarrow$ L<br>(SnCl(1)) H-24 $\rightarrow$ L<br>(HgCl(2)) H $\rightarrow$ L+10                                                                                                                                                                           | (ZnCl) $\pi(8\text{hq}) \rightarrow n(\text{Cl})\pi^*(8\text{hq})$<br>(SnCl(1)) $\pi(8\text{hq}) \rightarrow n(\text{Cl})n(8\text{hq-OH})\pi/\pi^*(8\text{hq})$<br>(HgCl(2)) $n(\text{Cl}) \rightarrow n(\text{Hg})$                                                                                                                                                                                |
| 313                   | 335  | 333     | 339     | 319     | 308     | 353  | 329  | 294.67     | 303.91 | 339.42  | 339.8   | 301.77           | 344.51                     | 356.92 | 313.96 |                                                                | (ZnCl, HgCl)<br>H-14 $\rightarrow$ L+1<br>(CdCl) H-7 $\rightarrow$ L+5<br>(HgCl(2)) H-30 $\rightarrow$ L<br>(SnCl(2)) H-1 $\rightarrow$ L+5<br>(SnCl(1)) H-19 $\rightarrow$ L+1<br>(PbCl) H-11 $\rightarrow$ L+10<br>(BiCl) H-10 $\rightarrow$ L+9                        | (ZnCl, SnCl(2), SnCl(1))<br>$\pi(8\text{hq}) \rightarrow \pi/\pi^*(8\text{hq})$<br>(CdCl) $n(\text{Cl})d(\text{Cd}) \rightarrow \pi^*(8\text{hq})$<br>(HgCl(1)) $\pi(8\text{hq}) \rightarrow \pi^*(8\text{hq})$<br>(HgCl(2)) $n(\text{Cl})d(\text{Hg}) \rightarrow n(\text{Cl})$<br>(PbCl) $n(\text{Cl}) \rightarrow \sigma^*(\text{Pb-Cl})$<br>(BiCl) $n(\text{Cl}) \rightarrow \pi^*(8\text{hq})$ |
|                       |      |         |         |         |         |      |      | 344.92     | 344.64 | 340.93  |         | 311.37           |                            |        | 353.25 |                                                                | (ZnCl) H-12 $\rightarrow$ L+1<br>(CdCl) H-13 $\rightarrow$ L+1                                                                                                                                                                                                            | (ZnCl) $\sigma(\text{Zn-Cl}) \rightarrow \pi(8\text{hq-OH-ring})/\pi^*(8\text{hq-N-ring})$                                                                                                                                                                                                                                                                                                          |

| $\lambda_{\max}$ (nm) |      |         |         |         |         |      |      |            |        |         |         |         |         |        |        | The most important orbitals involved in electronic transitions | Character of transition                                                                                                                                      |                                                                                                                                                                                                                                                                                                                                                                                                                         |
|-----------------------|------|---------|---------|---------|---------|------|------|------------|--------|---------|---------|---------|---------|--------|--------|----------------------------------------------------------------|--------------------------------------------------------------------------------------------------------------------------------------------------------------|-------------------------------------------------------------------------------------------------------------------------------------------------------------------------------------------------------------------------------------------------------------------------------------------------------------------------------------------------------------------------------------------------------------------------|
| Experimental          |      |         |         |         |         |      |      | Calculated |        |         |         |         |         |        |        |                                                                |                                                                                                                                                              |                                                                                                                                                                                                                                                                                                                                                                                                                         |
| ZnCl                  | CdCl | SnCl(2) | SnCl(1) | HgCl(1) | HgCl(2) | PbCl | BiCl | ZnCl       | CdCl   | SnCl(2) | SnCl(1) | HgCl(1) | HgCl(2) | PbCl   | BiCl   |                                                                |                                                                                                                                                              |                                                                                                                                                                                                                                                                                                                                                                                                                         |
|                       |      |         |         |         |         |      |      |            |        |         |         |         |         |        |        |                                                                | (SnCl(2)) H-24→L+1<br>(BiCl) H-23→L<br>(HgCl) H-7→L+5                                                                                                        | (CdCl, SnCl(2)) $\pi(8hq) \rightarrow \pi/\pi^*(8hq)$<br>(HgCl) $n(Cl) \rightarrow \pi^*(8hq)$<br>(BiCl) $\sigma(Bi-Cl)n(Cl) \rightarrow \pi/\pi^*(8hq)\sigma^*(Bi-Cl)$                                                                                                                                                                                                                                                 |
| 372                   | 421  | 418     | 423     | 365     | 360     | 407  | 417  | 402.95     | 423.12 | 379.27  | 390.47  | 356.83  | 353.45  | 395.76 | 414.93 |                                                                | (ZnCl) H-11→L+1<br>(CdCl) H-8→L+2<br>(SnCl(2)) H-1→L+4<br>(SnCl(1)) H-19→L<br>(BiCl) H-10→L+5<br>(PbCl) H-11→L+7<br>(HgCl(1)) H-13→L+1<br>(HgCl(2)) H-31→L+1 | (ZnCl) $\pi(8hq) \rightarrow \pi(8hq-OH-ring)/\pi^*(8hq-N-ring)$<br>(CdCl) $n(Cl)d(Cd) \rightarrow \pi^*(8hq)$<br>(SnCl(2)) $\pi(8hq) \rightarrow \pi/\pi^*(8hq)$<br>(SnCl(1)) $\pi(8hq) \rightarrow n(Cl)n(8hq-OH)\pi/\pi^*(8hq)$<br>(PbCl) $n(Cl) \rightarrow \sigma^*(Pb-Cl)$<br>(HgCl(1)) $\pi(8hq) \rightarrow \pi^*(8hq)$<br>(HgCl(2)) $\sigma(Hg-Cl) \rightarrow n(Cl)$<br>(BiCl) $n(Cl) \rightarrow \pi^*(8hq)$ |
|                       |      |         |         |         |         |      |      |            | 428.61 | 383.75  |         |         |         | 425.71 |        |                                                                | (CdCl) H-11→L<br>(SnCl(2)) H→L+5<br>(PbCl) H→L+12                                                                                                            | (CdCl) $\sigma(Cd-Cl)\pi(8hq) \rightarrow n(Cl)\pi/\pi^*(8hq)$<br>(SnCl(2)) $n(Cl)\pi(8hq) \rightarrow \pi/\pi^*(8hq)$<br>(PbCl) $n(Cl)\pi(8hq) \rightarrow \pi^*(8hq)$                                                                                                                                                                                                                                                 |
|                       |      |         |         |         |         |      |      |            | 427.87 |         |         |         |         |        |        |                                                                | (SnCl(2)) H-16→L                                                                                                                                             | (SnCl(2)) $n(Cl)\pi(8hq) \rightarrow \pi/\pi^*(8hq)$                                                                                                                                                                                                                                                                                                                                                                    |
| 427                   | 510  | 512     | 520     | 428     | 407     | 504  | 513  | 430.1      | 502.94 | 491.71  | 478.84  | 426.85  | 444.14  | 523.31 | 533.38 |                                                                | (ZnCl) H-11→L<br>(CdCl) H-7→L+2<br>(SnCl(2)) H→L+3<br>(SnCl(1)) H-14→L<br>(HgCl(1)) H-11→L+1<br>(HgCl(2)) H-32→L                                             | (ZnCl) $\pi(8hq) \rightarrow n(Cl)\pi^*(8hq)$<br>(CdCl) $n(Cl)d(Cd) \rightarrow \pi^*(8hq)$<br>(SnCl(2)) $n(Cl)\pi(8hq) \rightarrow \pi^*(8hq)$<br>(SnCl(1)) $\pi(8hq) \rightarrow n(Cl)n(8hq-OH)\pi/\pi^*(8hq)$<br>(HgCl(1)) $\sigma(Hg-Cl)\pi(8hq) \rightarrow \pi^*(8hq)$<br>(HgCl(2)) $\sigma(Hg-Cl) \rightarrow n(Cl)$                                                                                             |
|                       |      |         |         |         |         |      |      |            |        | 511.72  |         | 435.31  |         |        |        |                                                                | (SnCl(2)) H-6→L<br>(HgCl(1)) H-11→L                                                                                                                          | (SnCl(2)) $n(Cl) \rightarrow \pi/\pi^*(8hq)$<br>(HgCl(1)) $\sigma(Hg-Cl)\pi(8hq) \rightarrow n(Cl)\pi^*(8hq)$                                                                                                                                                                                                                                                                                                           |
| 490                   | 596  | 576     | 600     | 507     | 502     | 600  | 579  | 503.77     | 600.75 |         |         | 470.5   | 526.49  | 634.8  |        |                                                                | (ZnCl) H-5→L+3<br>(CdCl) H-4→L+2<br>(HgCl(1)) H-7→L+3                                                                                                        | (ZnCl, CdCl) $n(Cl)d(Zn,Cd) \rightarrow \pi^*(8hq)$<br>(HgCl(1)) $n(Cl) \rightarrow \pi^*(8hq)$                                                                                                                                                                                                                                                                                                                         |

| $\lambda_{\text{max}}$ (nm) |      |         |         |         |         |      |      |            |        |         |         |         |         |        |       | The most important orbitals involved in electronic transitions                                 | Character of transition                                                                                                                                                                                                                                                                                                                         |
|-----------------------------|------|---------|---------|---------|---------|------|------|------------|--------|---------|---------|---------|---------|--------|-------|------------------------------------------------------------------------------------------------|-------------------------------------------------------------------------------------------------------------------------------------------------------------------------------------------------------------------------------------------------------------------------------------------------------------------------------------------------|
| Experimental                |      |         |         |         |         |      |      | Calculated |        |         |         |         |         |        |       |                                                                                                |                                                                                                                                                                                                                                                                                                                                                 |
| ZnCl                        | CdCl | SnCl(2) | SnCl(1) | HgCl(1) | HgCl(2) | PbCl | BiCl | ZnCl       | CdCl   | SnCl(2) | SnCl(1) | HgCl(1) | HgCl(2) | PbCl   | BiCl  |                                                                                                |                                                                                                                                                                                                                                                                                                                                                 |
|                             |      |         |         |         |         |      |      |            |        |         |         |         | 539.7   |        |       | (PbCl) H-15→L<br>(HgCl(2)) H-22→L                                                              | (HgCl(2)) $\sigma(\text{Hg-Cl})n(\text{Cl})\rightarrow n(\text{Cl})$<br>(PbCl) $n(\text{Cl})\rightarrow n(\text{Cl})\pi^*(8\text{hq})$                                                                                                                                                                                                          |
| 542                         | 681  | 644     |         |         | 623     | 691  | 643  | 579.77     | 700.77 |         |         |         | 631.94  | 672.58 |       | (HgCl(2)) H-22→L+1<br>(ZnCl) H-5→L+2<br>(CdCl) H-9→L+1<br>(PbCl) H-1→L+7<br>(HgCl(2)) H-22→L+1 | (HgCl(2)) $\sigma(\text{Hg-Cl})n(\text{Cl})\rightarrow n(\text{Cl})$<br>(ZnCl) $n(\text{Cl})d(\text{Zn})\rightarrow \pi^*(8\text{hq})$<br>(CdCl) $n(\text{Cl})d(\text{Cd})\rightarrow \pi/\pi^*(8\text{hq})$<br>(PbCl) $n(\text{Cl})\rightarrow \sigma^*(\text{Pb-Cl})$<br>(HgCl(2)) $\sigma(\text{Hg-Cl})n(\text{Cl})\rightarrow n(\text{Cl})$ |
| 680                         |      | 756     | 737     |         | 683     | 771  | 719  | 695.06     |        |         |         |         | 676.89  | 759.78 | 691.6 | (ZnCl) H-9→L<br>(PbCl) H→L+6<br>(BiCl) H-14→L<br>(HgCl(2)) H-21+L                              | (ZnCl) $n(\text{Cl})d(\text{Zn})\rightarrow n(\text{Cl})\pi^*(8\text{hq})$<br>(PbCl) $n(\text{Cl})\pi(8\text{hq})\rightarrow \pi^*(8\text{hq})$<br>(BiCl) $n(\text{Cl})\rightarrow \sigma^*(\text{Bi-Cl})\pi/\pi^*(8\text{hq})$<br>(HgCl(2)) $n(\text{Cl})\rightarrow n(\text{Cl})$                                                             |
| 767                         |      |         |         |         |         |      |      | 728.03     |        |         |         |         |         |        |       | (ZnCl) H-8→L                                                                                   | (ZnCl) $n(\text{Cl})d(\text{Zn})\rightarrow n(\text{Cl})\pi^*(8\text{hq})$                                                                                                                                                                                                                                                                      |

Used abbreviations: d – d orbital, n – non-bonding orbital,  $\sigma$  -  $\sigma$  orbital,  $\pi$  -  $\pi$  orbital, poly – orbital belonging to inorganic polymer chain, stack – orbital associated with the 8Hq stacked system, \* - an antibonding orbital.

Table S8. The most important electronic transitions for the bromide compounds containing the close-shell coordination centers. H letter indicates HOMO, L - LUMO,  $\alpha$  –  $\alpha$  orbitals,  $\beta$  -  $\beta$  orbitals, and +/- (number) represents subsequent orbitals below HOMO and above LUMO, respectively.

| $\lambda_{\text{max}}$ (nm) |      |      |      |      |            |        |        |        |        | The most important orbitals involved in electronic transitions                                   | Character of transition                                                                                                                                                                                                                                                                                                                                                    |       |        |  |  |                  |                                                          |
|-----------------------------|------|------|------|------|------------|--------|--------|--------|--------|--------------------------------------------------------------------------------------------------|----------------------------------------------------------------------------------------------------------------------------------------------------------------------------------------------------------------------------------------------------------------------------------------------------------------------------------------------------------------------------|-------|--------|--|--|------------------|----------------------------------------------------------|
| Experimental                |      |      |      |      | Calculated |        |        |        |        |                                                                                                  |                                                                                                                                                                                                                                                                                                                                                                            |       |        |  |  |                  |                                                          |
| CdBr                        | ZnBr | SnBr | HgBr | PbBr | CdBr       | ZnBr   | SnBr   | HgBr   | PbBr   |                                                                                                  |                                                                                                                                                                                                                                                                                                                                                                            |       |        |  |  |                  |                                                          |
|                             |      |      |      |      |            |        |        |        |        | (CdBr) H-14 → L+2<br>(ZnBr) H-17 → L<br>(SnBr) H-23 → L<br>(HgBr) H-17 → L<br>(PbBr) H-14 → L+15 | (CdBr) $\pi(8\text{hq})\rightarrow \pi^*(8\text{hq})$<br>(ZnBr) $\pi(8\text{hq})\rightarrow \pi/\pi^*(8\text{hq})$<br>(SnBr) $n(8\text{hq-OH})n(8\text{hq-N})\pi(8\text{hq})\rightarrow n(\text{Br})n(8\text{hq-OH})\pi^*(8\text{hq})$<br>(HgBr) $\pi(8\text{hq})\rightarrow n(\text{Br})\pi^*(8\text{hq})$<br>(PbBr) $n(\text{Br})\rightarrow \text{complex}(8\text{hq})$ |       |        |  |  |                  |                                                          |
| 241                         | 244  | 229  | 238  | 225  | 223.22     | 209.47 | 228.52 | 226.32 | 227.24 | 228.74                                                                                           | 215.18                                                                                                                                                                                                                                                                                                                                                                     | 229.2 | 229.07 |  |  | (CdBr) H-8 → L+7 | (CdBr) $n(\text{Br})\rightarrow \sigma^*(8\text{hq-OH})$ |

|                                        |      |      |      |      | <b>The most important orbitals involved in electronic transitions</b> |        |        |        |        | <b>Character of transition</b>                                                                                                         |                                                                                                                                                                                                                                         |
|----------------------------------------|------|------|------|------|-----------------------------------------------------------------------|--------|--------|--------|--------|----------------------------------------------------------------------------------------------------------------------------------------|-----------------------------------------------------------------------------------------------------------------------------------------------------------------------------------------------------------------------------------------|
| <b><math>\lambda_{max}</math> (nm)</b> |      |      |      |      |                                                                       |        |        |        |        |                                                                                                                                        |                                                                                                                                                                                                                                         |
| Experimental                           |      |      |      |      | Calculated                                                            |        |        |        |        |                                                                                                                                        |                                                                                                                                                                                                                                         |
| CdBr                                   | ZnBr | SnBr | HgBr | PbBr | CdBr                                                                  | ZnBr   | SnBr   | HgBr   | PbBr   |                                                                                                                                        |                                                                                                                                                                                                                                         |
|                                        |      |      |      |      |                                                                       |        |        |        |        | (ZnBr) H-3 $\rightarrow$ L+12<br>(SnBr) H-14 $\rightarrow$ L+4<br>(HgBr) H-11 $\rightarrow$ L+4                                        | (ZnBr) n(Br)d(Zn) $\rightarrow$ $\pi^*$ (8hq)<br>(SnBr) n(8hq-OH) $\pi$ (8hq) $\rightarrow$ n(8hq-OH) $\pi^*$ (8hq)<br>(HgBr) $\pi$ (8hq) $\rightarrow$ $\pi^*$ (8hq)                                                                   |
|                                        |      |      |      |      | 229.52                                                                | 223.30 | 231.7  | 230.81 |        | (CdBr) H-15 $\rightarrow$ L+1<br>(ZnBr) H-14 $\rightarrow$ L+1<br>(SnBr) H-18 $\rightarrow$ L+3<br>(HgBr) H-6 $\rightarrow$ L+10       | (CdBr) $\pi$ (8hq) $\rightarrow$ $\pi^*$ (8hq)<br>(ZnBr) n(8hq-OH) $\pi$ (8hq) $\rightarrow$ $\pi^*$ (8hq)n(Br)<br>(SnBr) n(8hq-OH)n(8hq-N) $\pi$ (8hq) $\rightarrow$ $\pi^*$ (8hq)<br>(HgBr) n(Br)d(Hg) $\rightarrow$ $\sigma^*$ (8hq) |
|                                        |      |      |      |      | 245.3                                                                 | 229.61 | 238    | 236.67 |        | (CdBr) H-13 $\rightarrow$ L+3<br>(ZnBr) H-3 $\rightarrow$ L+10<br>(SnBr) H-22 $\rightarrow$ L<br>(HgBr) H-2 $\rightarrow$ L+11         | (CdBr) $\pi$ (8hq) $\rightarrow$ $\pi^*$ (8hq)<br>(ZnBr) n(Br)d(Zn) $\rightarrow$ $\pi^*$ (8hq)<br>(SnBr) n(8hq-OH) $\pi$ (8hq) $\rightarrow$ n(8hq-OH) $\pi^*$ (8hq)<br>(HgBr) n(Br)d(Hg) $\rightarrow$ $\sigma^*$ (8hq)               |
|                                        |      |      |      |      | 272.04                                                                | 245.19 | 260.1  | 253.64 |        | (CdBr) H-15 $\rightarrow$ L+1<br>(ZnBr) H-12 $\rightarrow$ L+3<br>(SnBr) H $\rightarrow$ L+11<br>(HgBr) H-12 $\rightarrow$ L+3         | (CdBr, HgBr) $\pi$ (8hq) $\rightarrow$ $\pi^*$ (8hq)<br>(ZnBr) $\pi$ (8hq)n(8hq-N) $\rightarrow$ $\pi^*$ (8hq)<br>(SnBr) n(Br) $\rightarrow$ n(H <sub>2</sub> O-OH) $\pi^*$ (8hq)                                                       |
|                                        |      |      |      |      | 296.79                                                                | 252.97 |        | 254.44 | 254.2  | (CdBr) H-14 $\rightarrow$ L<br>(ZnBr) H-5 $\rightarrow$ L+7<br>(HgBr) H-12 $\rightarrow$ L+3<br>(PbBr) H-14 $\rightarrow$ L+10         | (CdBr) $\pi$ (8hq) $\rightarrow$ n(Br) $\pi/\pi^*$ (8hq)<br>(ZnBr) n(Br)d(Zn)n(8hq-N) $\rightarrow$ $\pi^*$ (8hq)<br>(HgBr) $\pi$ (8hq) $\rightarrow$ $\pi^*$ (8hq)<br>(PbBr) n(Br) $\pi$ (8hq) $\rightarrow$ $\sigma^*$ (Pb-Br)        |
|                                        |      |      |      |      | 301.6                                                                 | 253.70 |        | 275.07 |        | (CdBr) H-1 $\rightarrow$ L+7<br>(ZnBr) H-3 $\rightarrow$ L+8<br>(HgBr) H-14 $\rightarrow$ L+1                                          | (CdBr) n(Br) $\rightarrow$ $\sigma^*$ (8hq-OH)<br>(ZnBr) n(Br)d(Zn) $\rightarrow$ $\pi^*$ (8hq)<br>(HgBr) $\pi$ (8hq) $\rightarrow$ $\pi/\pi^*$ (8hq)                                                                                   |
|                                        |      |      |      |      | 348.75                                                                | 308.01 | 314.41 | 355.44 | 267.92 | (CdBr, HgBr)<br>H-13 $\rightarrow$ L+1<br>(ZnBr) H-15 $\rightarrow$ L<br>(SnBr) H-7 $\rightarrow$ L+7<br>(PbBr) H-36 $\rightarrow$ L+1 | (CdBr, PbBr) $\pi$ (8hq) $\rightarrow$ $\pi^*$ (8hq)<br>(ZnBr) $\pi$ (8hq)n(8hq-OH) $\rightarrow$ $\pi/\pi^*$ (8hq)<br>(SnBr) n(Br) $\rightarrow$ $\sigma^*$ (Sn-Br)<br>(HgBr) $\sigma$ (Hg-Br) $\rightarrow$ $\pi/\pi^*$ (8hq)         |
| 338                                    | 324  | 315  | 324  | 298  | 353.91                                                                | 317.37 | 320.95 |        | 303.29 | (CdBr) H-4 $\rightarrow$ L+5<br>(ZnBr) H-11 $\rightarrow$ L+1<br>(SnBr) H-6 $\rightarrow$ L+7<br>(PbBr) H-23 $\rightarrow$ L+3         | (CdBr) n(Br) $\rightarrow$ $\pi^*$ (8hq)<br>(ZnBr) $\pi$ (8hq) $\rightarrow$ $\pi^*$ (8hq)n(Br)<br>(SnBr, PbBr) n(Br) $\rightarrow$ $\sigma^*$ (Sn,Pb-Br)                                                                               |
|                                        |      |      |      |      | 367.81                                                                | 327.09 | 351.64 |        |        | (CdBr) H-13 $\rightarrow$ L                                                                                                            | (CdBr) $\pi$ (8hq) $\rightarrow$ n(Br) $\pi/\pi^*$ (8hq)                                                                                                                                                                                |

|                                        |      |      |      |      | <b>The most important orbitals involved in electronic transitions</b> |        |        |        |        | <b>Character of transition</b>                                                             |                                                                                                                                                                                                                                   |
|----------------------------------------|------|------|------|------|-----------------------------------------------------------------------|--------|--------|--------|--------|--------------------------------------------------------------------------------------------|-----------------------------------------------------------------------------------------------------------------------------------------------------------------------------------------------------------------------------------|
| <b><math>\lambda_{max}</math> (nm)</b> |      |      |      |      |                                                                       |        |        |        |        |                                                                                            |                                                                                                                                                                                                                                   |
| Experimental                           |      |      |      |      | Calculated                                                            |        |        |        |        |                                                                                            |                                                                                                                                                                                                                                   |
| CdBr                                   | ZnBr | SnBr | HgBr | PbBr | CdBr                                                                  | ZnBr   | SnBr   | HgBr   | PbBr   |                                                                                            |                                                                                                                                                                                                                                   |
|                                        |      |      |      |      |                                                                       |        |        |        |        | (ZnBr) H-4→L+5<br>(SnBr) H-18→L+1                                                          | (ZnBr) n(Br)d(Zn)→ $\pi^*(8hq)$<br>(SnBr) n(8hq-OH)n(8hq-N) $\pi(8hq)$ →n(8hq-OH) $\pi/\pi^*(8hq)$                                                                                                                                |
|                                        |      |      |      |      | 409.92                                                                | 331.90 |        |        |        | (CdBr) H-11→L+1<br>(ZnBr) H-10→L+3                                                         | (CdBr) $\sigma$ (Cd-Br) $\pi(8hq)$ → $\pi^*(8hq)$<br>(ZnBr) $\sigma$ (Zn-Br)n(Br)→ $\pi^*(8hq)$                                                                                                                                   |
|                                        |      |      |      |      | 434.05                                                                | 412.79 | 395.98 |        | 438.11 | (CdBr) H-11→L<br>(ZnBr) H-6→L+3<br>(SnBr) H-15→L<br>(PbBr) H-10→L+5                        | (CdBr) $\sigma$ (Cd-Br) $\pi(8hq)$ → n(Br) $\pi/\pi^*(8hq)$<br>(ZnBr) n(Br)d(Zn)n(8hq-N)→ $\pi^*(8hq)$<br>(SnBr) $\sigma$ (Sn-Br)n(Br)n(H <sub>2</sub> O-OH)→ n(8hq-OH) $\pi^*(8hq)$<br>(PbBr) n(Br)→ $\sigma^*(Pb-Br)\pi^*(8hq)$ |
| 421                                    | 426  | 416  | 411  | 411  | 491.91                                                                | 454.95 | 410.7  | 413.57 |        | (CdBr) H-6→L+3<br>(ZnBr) H-4→L+3<br>(SnBr) H-14→L+1<br>(HgBr) H-9→L+3                      | (CdBr, HgBr) n(Br)→ $\pi^*(8hq)$<br>(ZnBr) n(Br)d(Zn)→ $\pi^*(8hq)$<br>(SnBr) n(8hq-OH) $\pi(8hq)$ → $\pi/\pi^*(8hq)n(8hq-OH)$                                                                                                    |
|                                        |      |      |      |      | 533.42                                                                | 563.86 | 480.15 | 464.98 | 488.43 | (CdBr) H-6→L+2<br>(ZnBr) H-5→L+2<br>(SnBr) H-14→L<br>(HgBr) H-11→L<br>(PbBr) H-10→L+4      | (CdBr) n(Br)→ $\pi^*(8hq)$<br>(ZnBr) n(Br)d(Zn)n(8hq-N)→ $\pi^*(8hq)$<br>(SnBr) n(8hq-OH) $\pi(8hq)$ → n(8hq-OH) $\pi^*(8hq)$<br>(HgBr) $\pi(8hq)$ → n(Br) $\pi^*(8hq)$<br>(PbBr) n(Br)→ $\sigma^*(Pb-Br)\pi^*(8hq)$              |
| 539                                    | 513  | 521  | 535  | 503  |                                                                       |        | 518.73 | 522.05 | 520.38 | (SnBr) H-5→L+3<br>(HgBr) H-6→L+3<br>(PbBr) H→L+12                                          | (SnBr) n(Br)→ $\pi^*(8hq)$<br>(HgBr) n(Br)d(Hg)→ $\pi^*(8hq)$<br>(PbBr) n(Br) $\pi(8hq)$ → $\pi^*(8hq)$                                                                                                                           |
|                                        |      |      |      |      |                                                                       |        | 525.96 |        |        | (SnBr) H-4→L+3                                                                             | (SnBr) n(Br)→ $\pi^*(8hq)$                                                                                                                                                                                                        |
| 631                                    | 623  | 632  | 641  | 622  | 623.93                                                                | 592.49 | 628.54 | 674.59 | 590.66 | (CdBr, HgBr) H-4 → L+2<br>(ZnBr) H-4→L+2<br>(SnBr) H-11→L+1<br>(PbBr) H-4 → L+8            | (CdBr) n(Br)→ $\pi^*(8hq)$<br>(ZnBr) n(Br)d(Zn)→ $\pi^*(8hq)$<br>(SnBr) n(Br)→ n(8hq-OH) $\pi/\pi^*(8hq)$<br>(HgBr) n(Br)d(Hg)→ $\pi^*(8hq)$<br>(PbBr) n(Br)→ $\sigma^*(Pb-Br)\pi^*(8hq)$                                         |
| 705                                    | 727  | 700  | 701  | 716  | 732.73                                                                | 751.04 | 708.17 | 680.03 | 727.40 | (CdBr) H-10 → L<br>(ZnBr) H-4→L+1<br>(SnBr) H-12→L<br>(HgBr) H-10→L+1<br>(PbBr) H-1 → L+10 | (CdBr) n(Br)→ n(Br) $\pi/\pi^*(8hq)$<br>(ZnBr) n(Br)d(Zn)→ $\pi^*(8hq)n(Br)$<br>(SnBr) n(Br)n(H <sub>2</sub> O)→ n(8hq-OH) $\pi^*(8hq)$<br>(HgBr) $\sigma$ (Hg-Br)d(Hg)→ $\pi/\pi^*(8hq)$<br>(PbBr) n(Br)→ $\sigma^*(Pb-Br)$      |

Used abbreviations: d – d orbital, n – non-bonding orbital,  $\sigma$  -  $\sigma$  orbital,  $\pi$  -  $\pi$  orbital, \* - an antibonding orbital.

### 3. Supplemental figures

XRPD pattern (Figure S1)

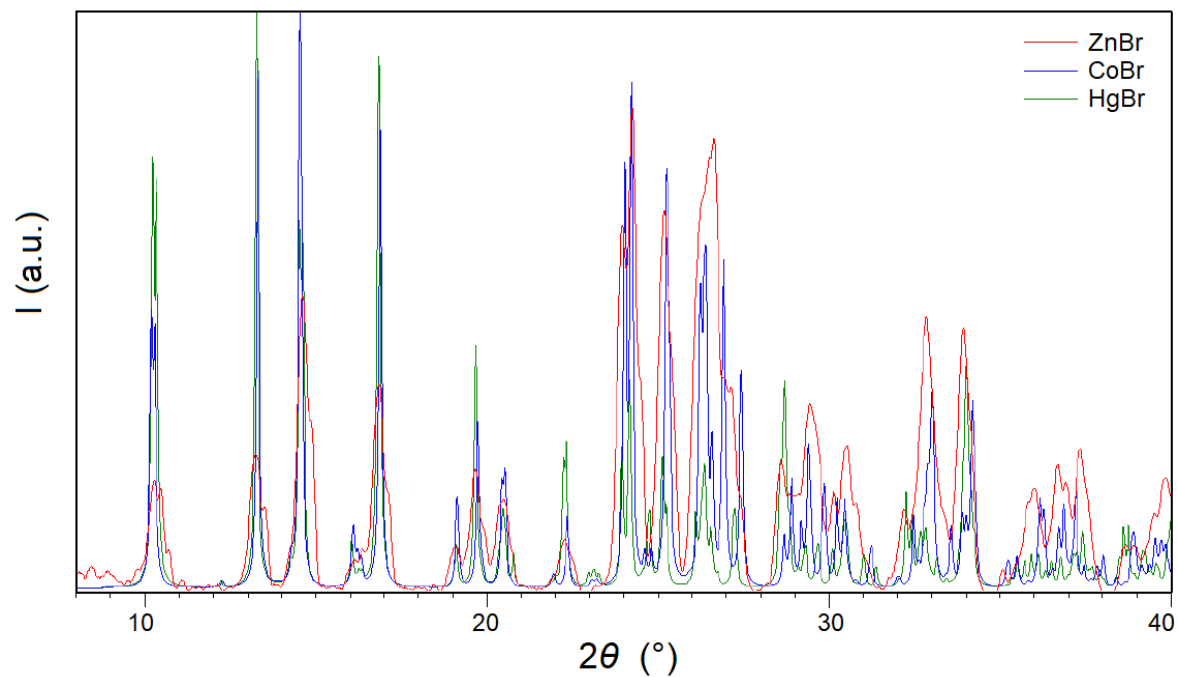

Figure S1. Experimental XRPD pattern of ZnBr (red) and theoretical XRPD patterns of CoBr (blue) and HgBr (green) generated in Mercury 2022.1.0 software based on CIF files of these compounds.

Molecular structures and intermolecular interactions (Figure S2-S18)

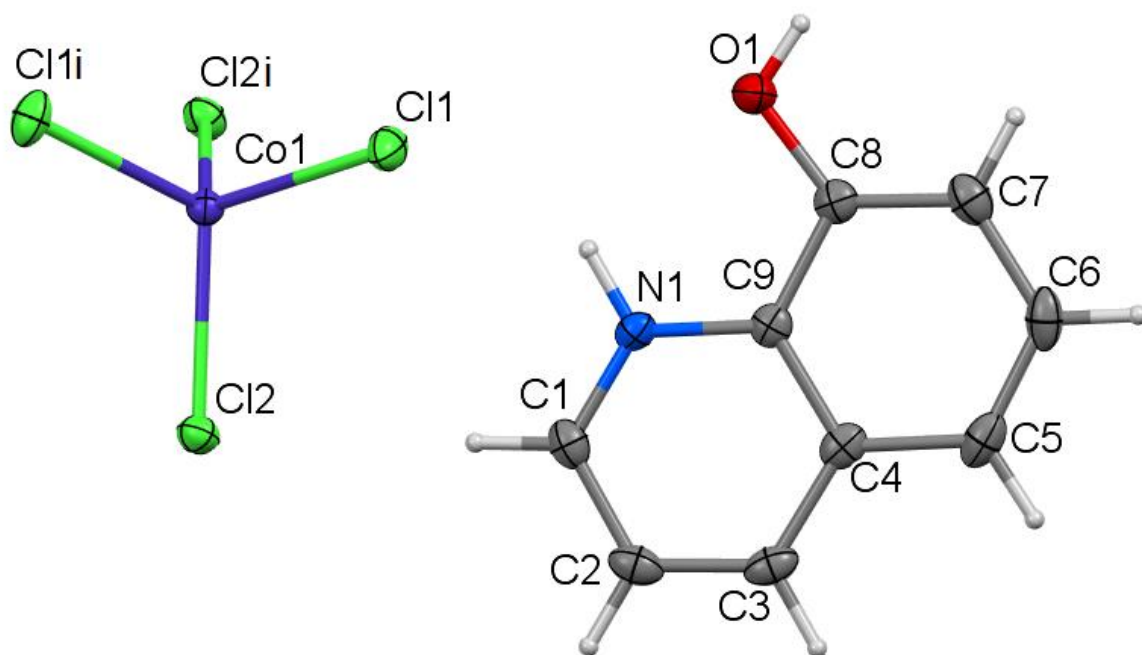

Figure S2. Molecular structure of CoCl. The equivalent atoms were generated according to symmetry transformations: (i)  $-x+1, y, -z+0.5$ .

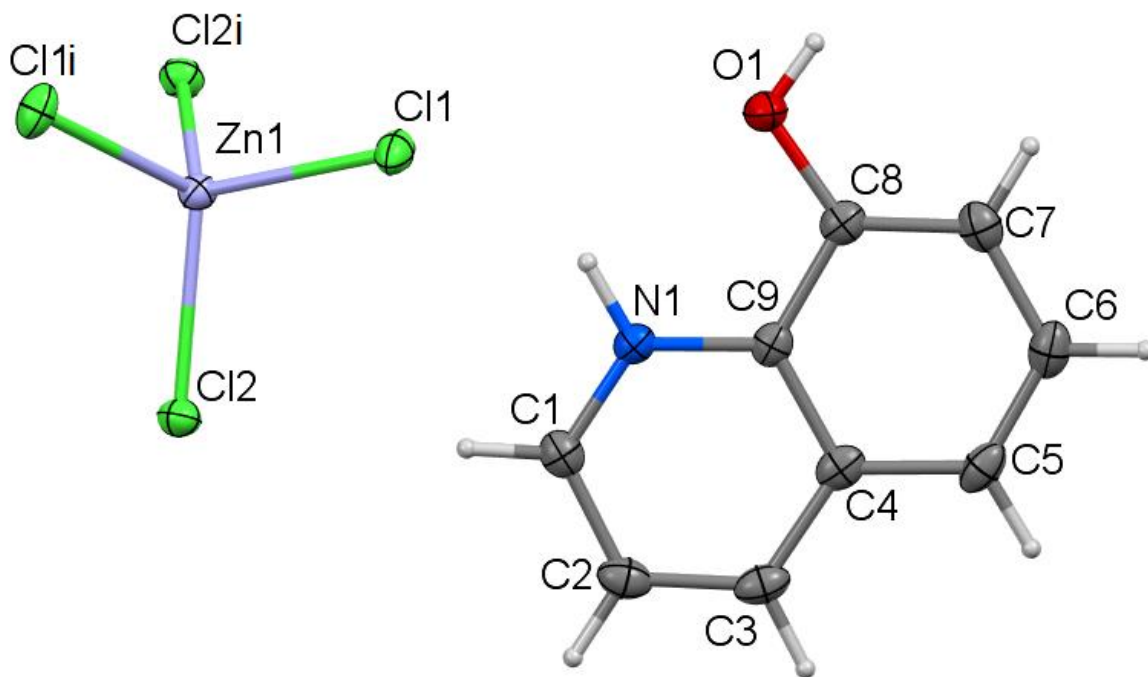

Figure S3. Molecular structure of ZnCl. The equivalent atoms were generated according to symmetry transformations: (i)  $-x+1, y, -z+0.5$ .

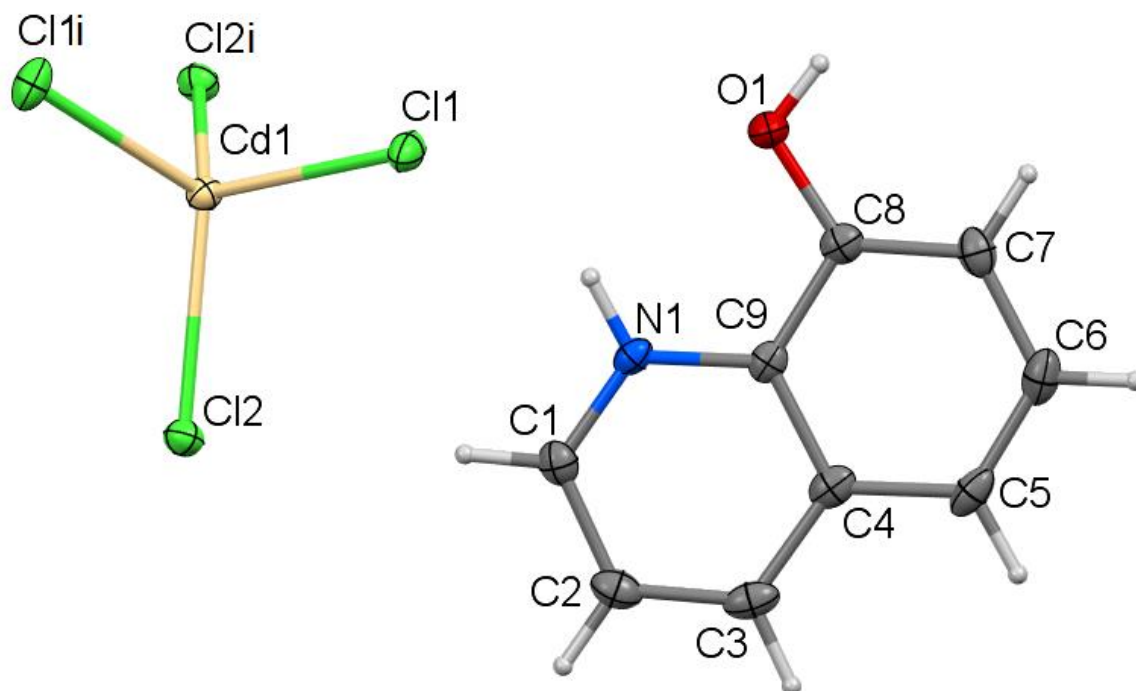

Figure S4. Molecular structure of CdCl. The equivalent atoms were generated according to symmetry transformations: (i)  $-x+1, y, -z+0.5$ .



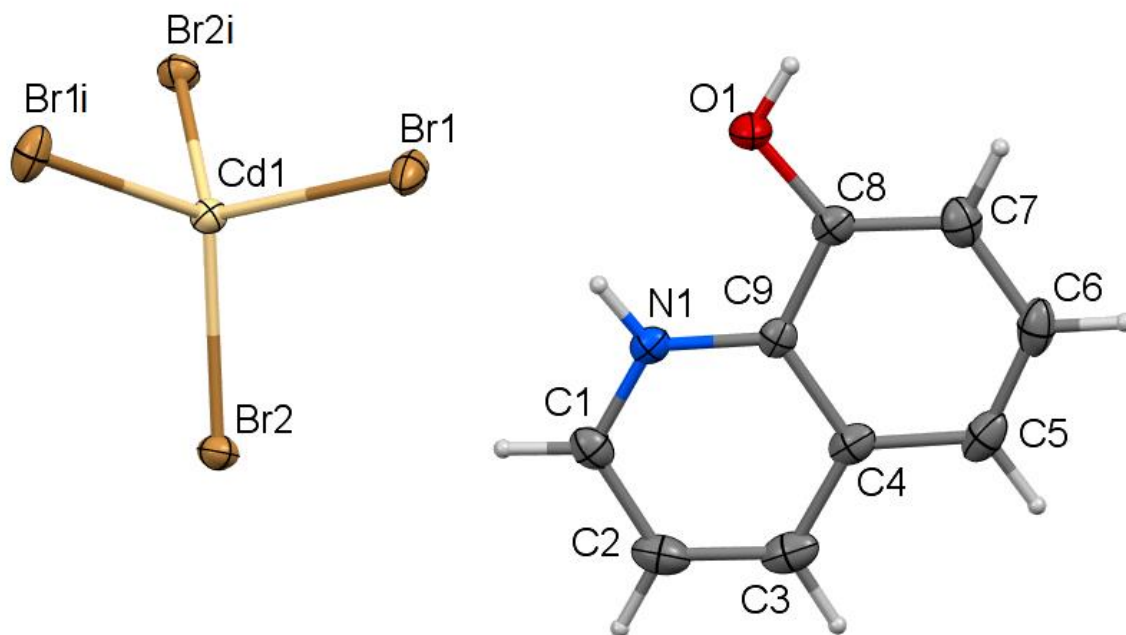

Figure S5. Molecular structure of CdBr. The equivalent atoms were generated according to symmetry transformations: (i)  $-x+1, y, -z+0.5$ .

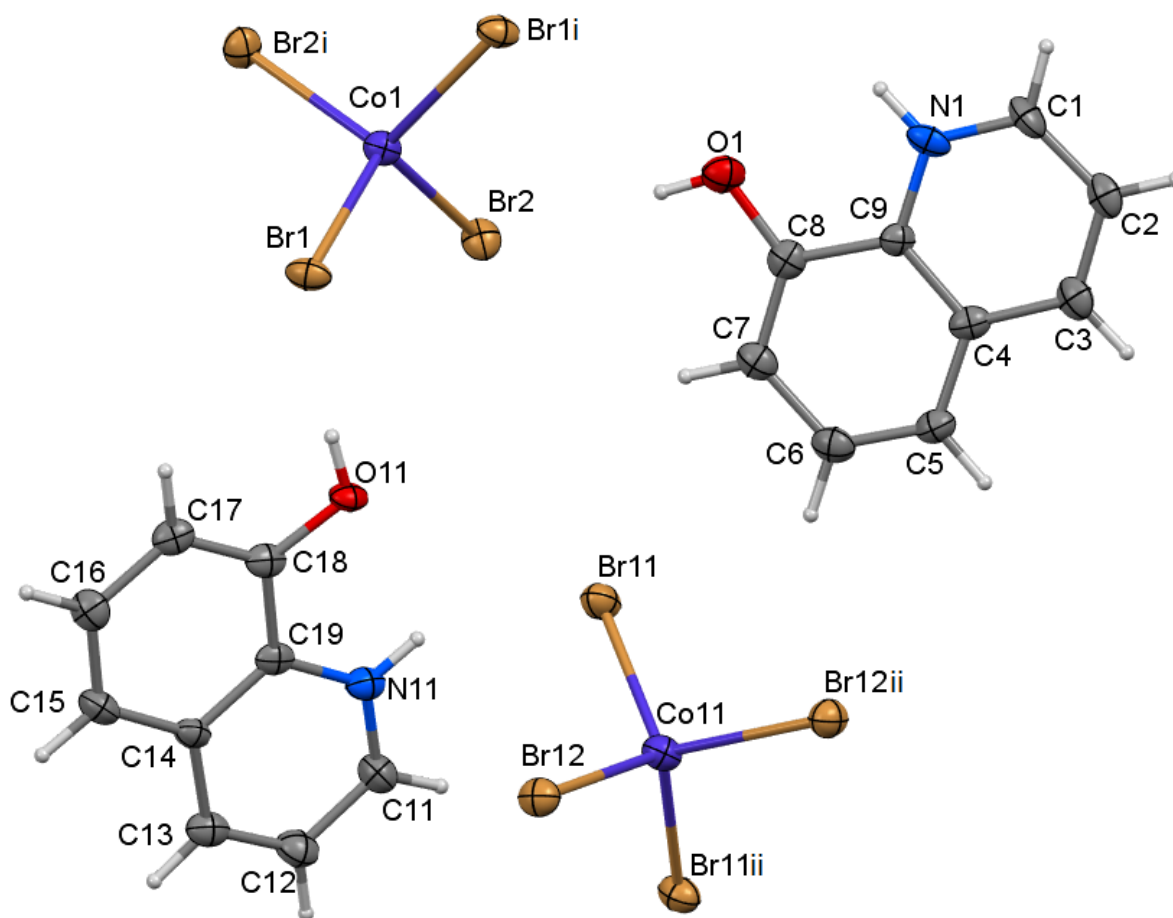

Figure S6. Molecular structure of CoBr. The equivalent atoms were generated according to symmetry transformations: (i)  $-x+0.5, y, -z+0.5$ ; (ii)  $-x+1.5, y, -z+0.5$

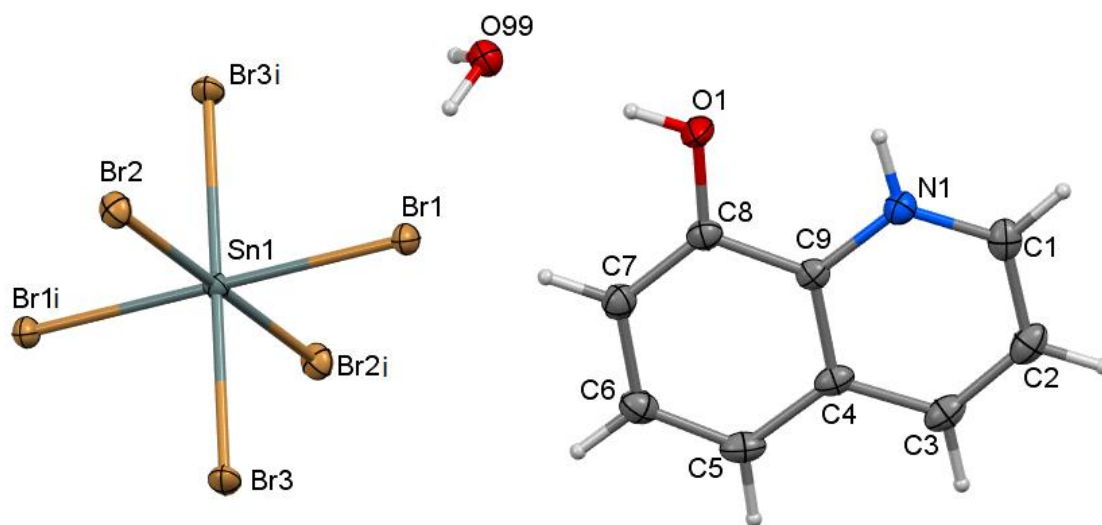

Figure S7. Molecular structure of SnBr. The equivalent atoms were generated according to symmetry transformations: (i)  $-x+1, -y, -z+1$ .

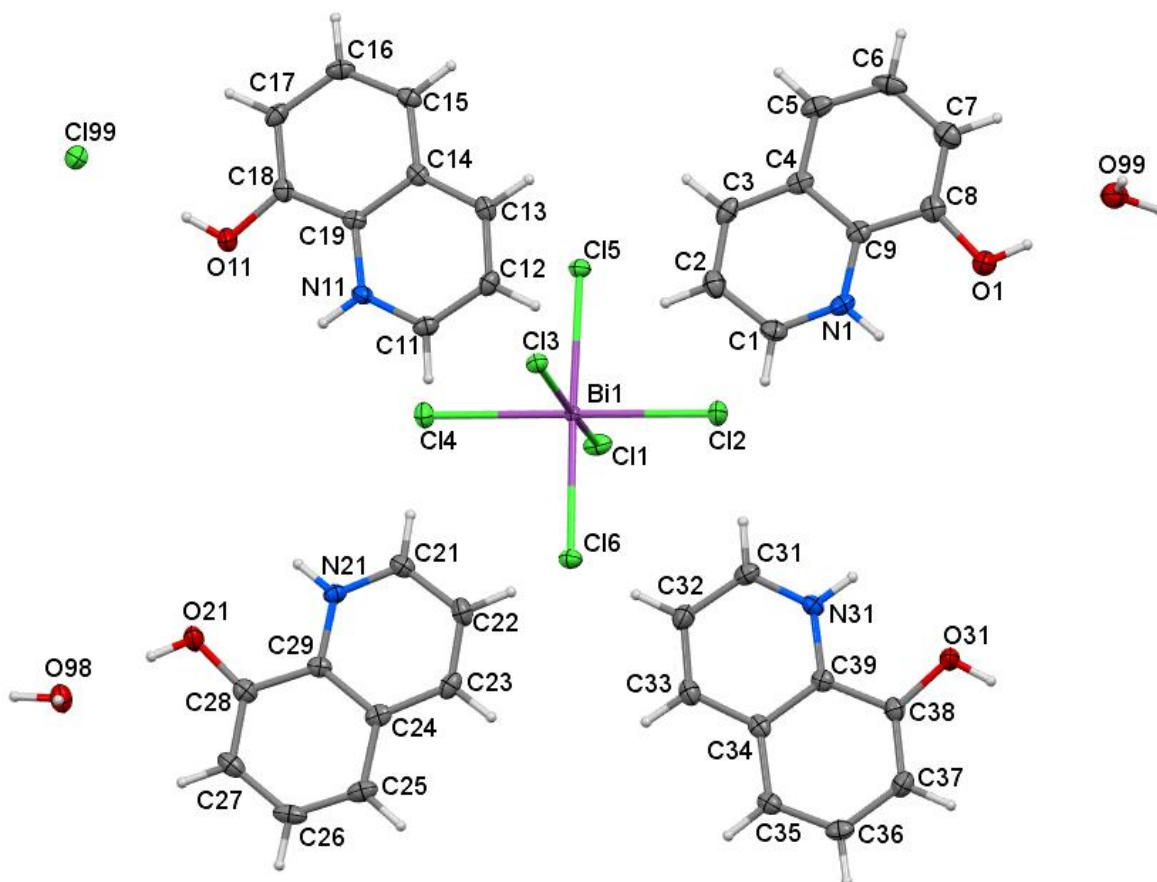

Figure S8. Molecular structure of BiCl.

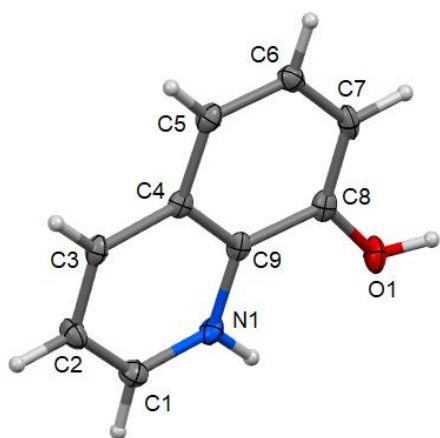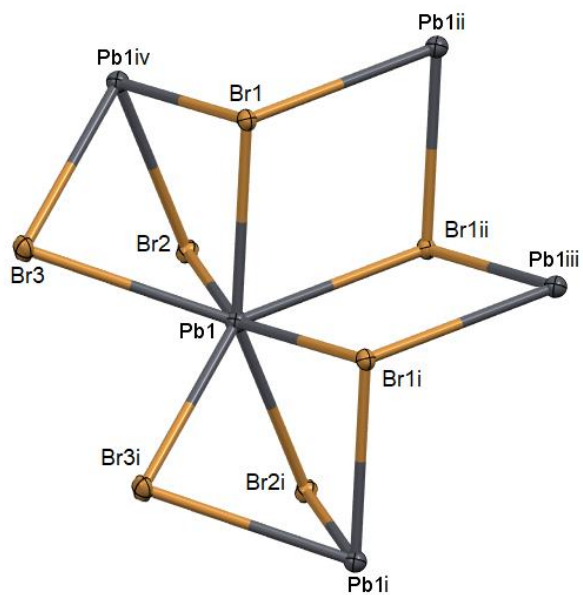

Figure S9. Molecular structure of PbBr. The equivalent atoms were generated according to symmetry transformations: (i)  $x+1, y, z$ ; (ii)  $-x+1, -y+1, -z$ ; (iii)  $-x+2, -y+1, -z$ ; (iv)  $x-1, y, z$

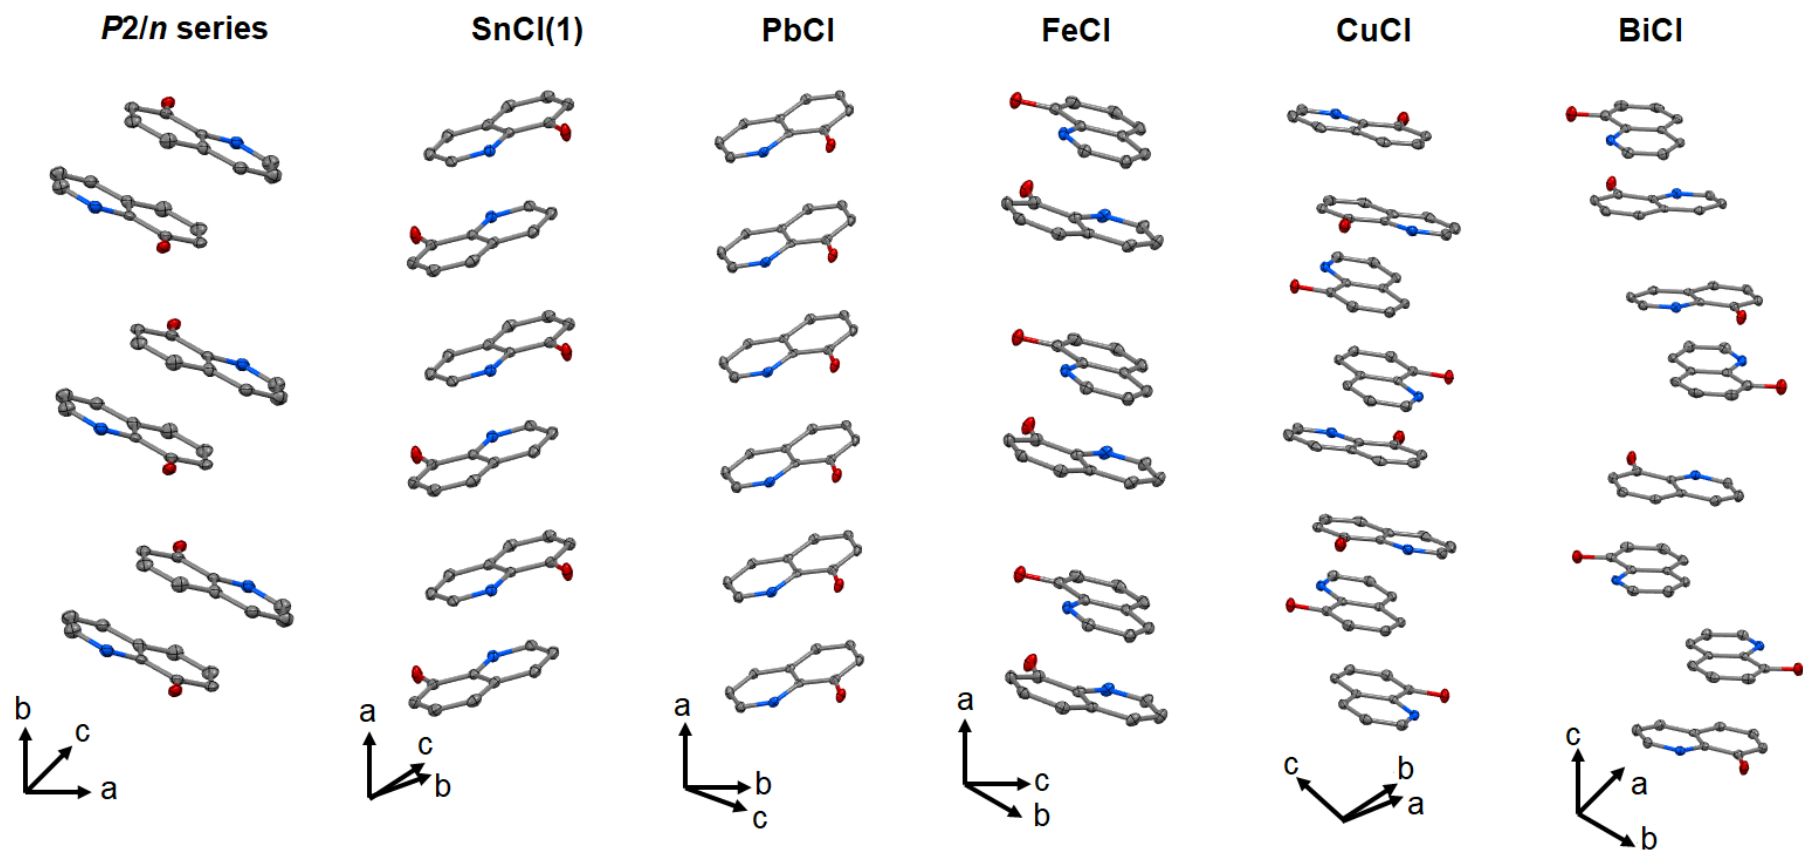

Figure S10. 8hqH<sup>+</sup> stacks assembled according to different motifs of  $\pi$ - $\pi$  interactions in the studied compounds.

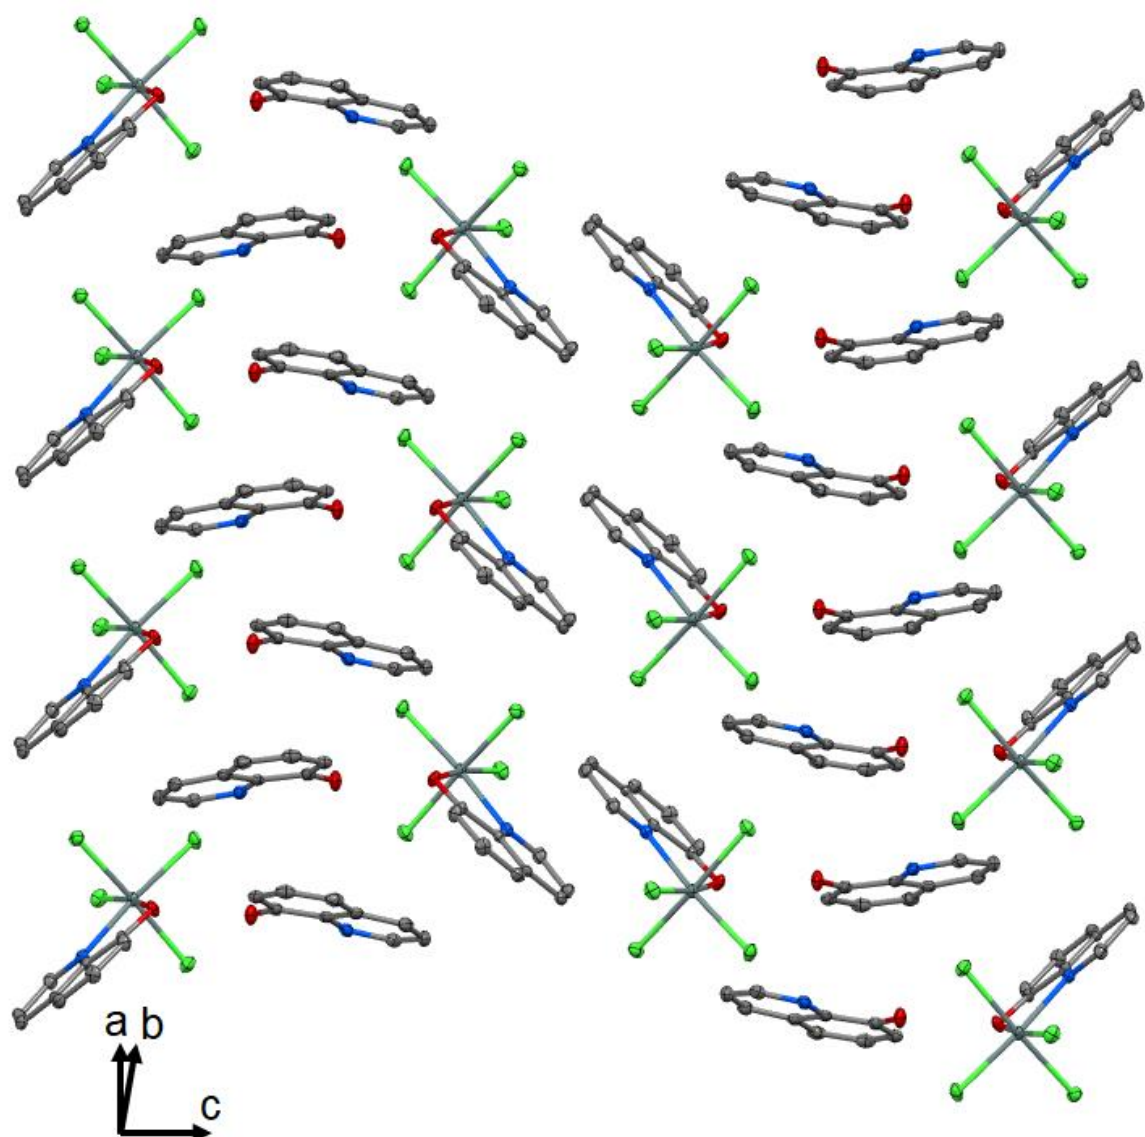

Figure S11. Molecular packing in SnCl(2) showing  $\pi$ - $\pi$  interactions.

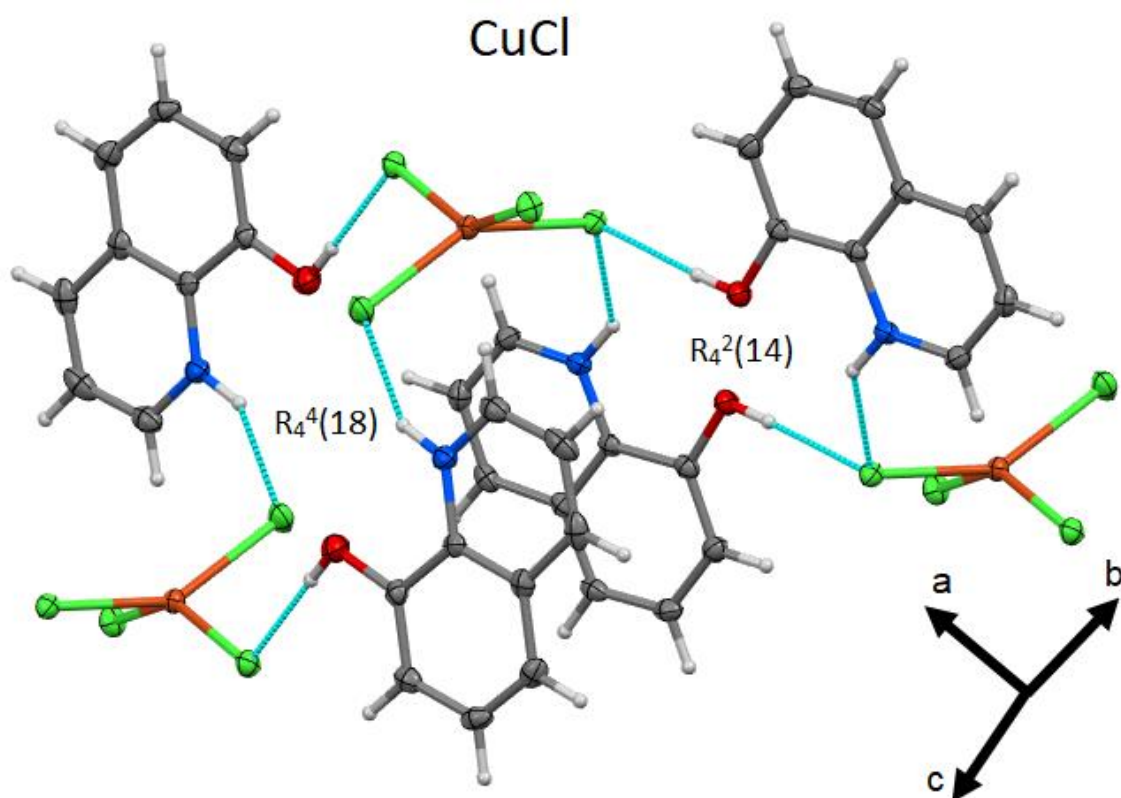

Figure S12. H-bond ring motifs in the structure of CuCl

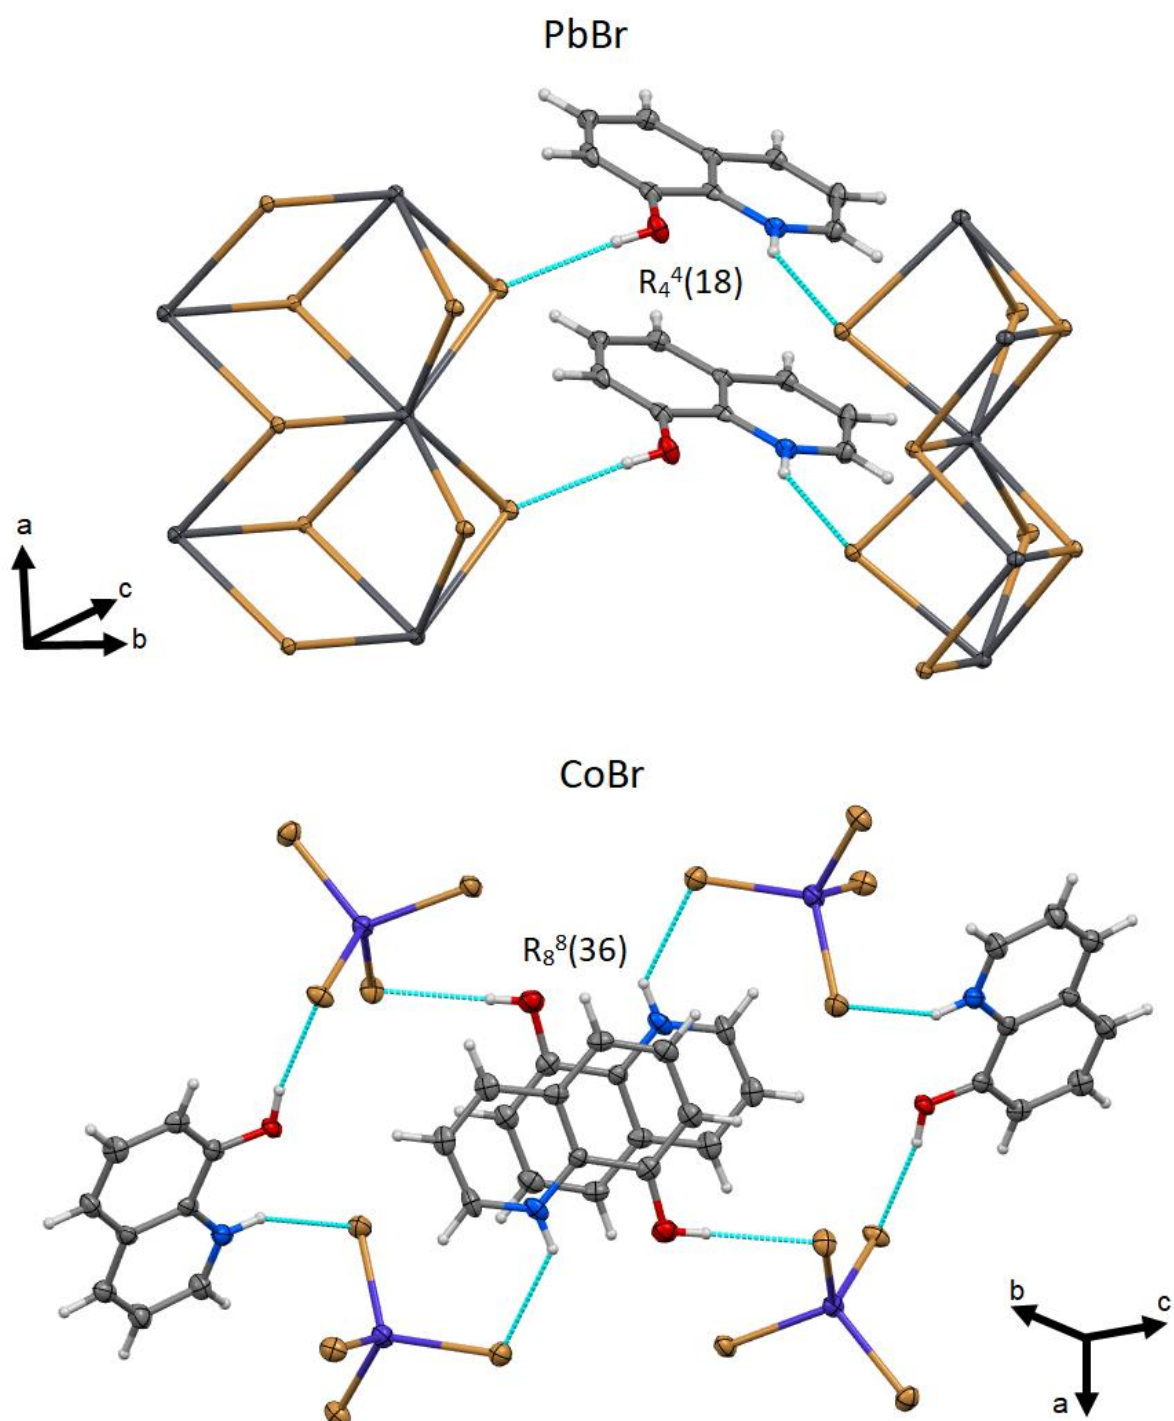

Figure S13. H-bond ring motifs in the structure of PbBr and CoBr



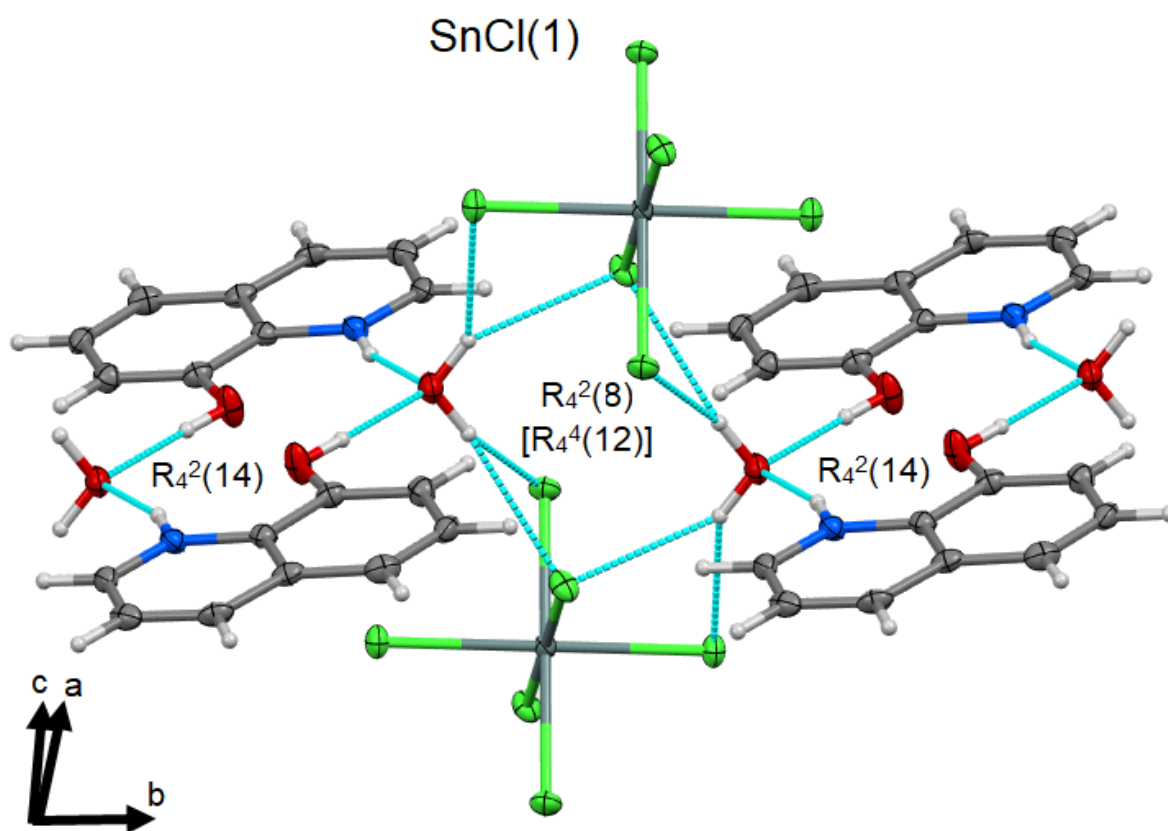

Figure S14. H-bond ring motifs in the structure of SnCl(1).



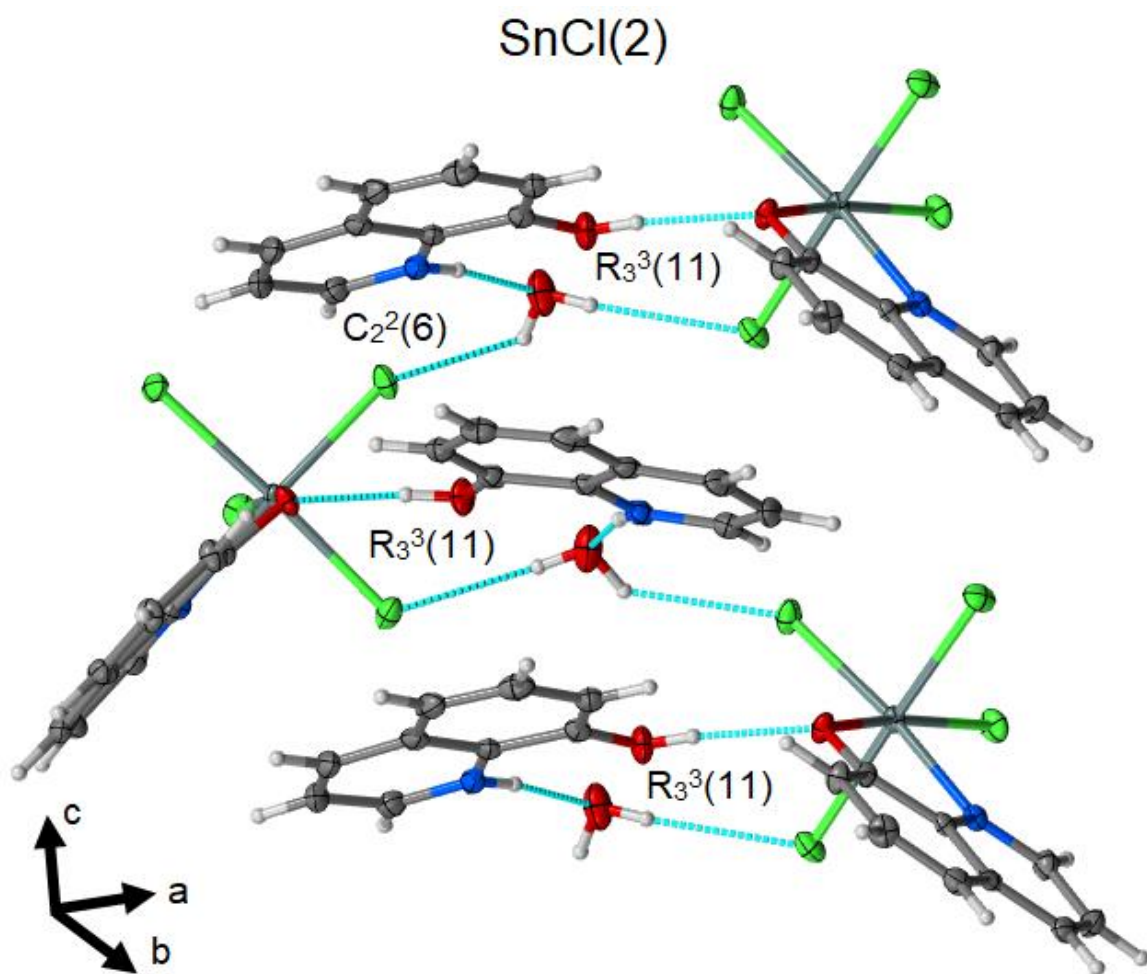

Figure S15. H-bond motifs in the structure of SnCl(2)

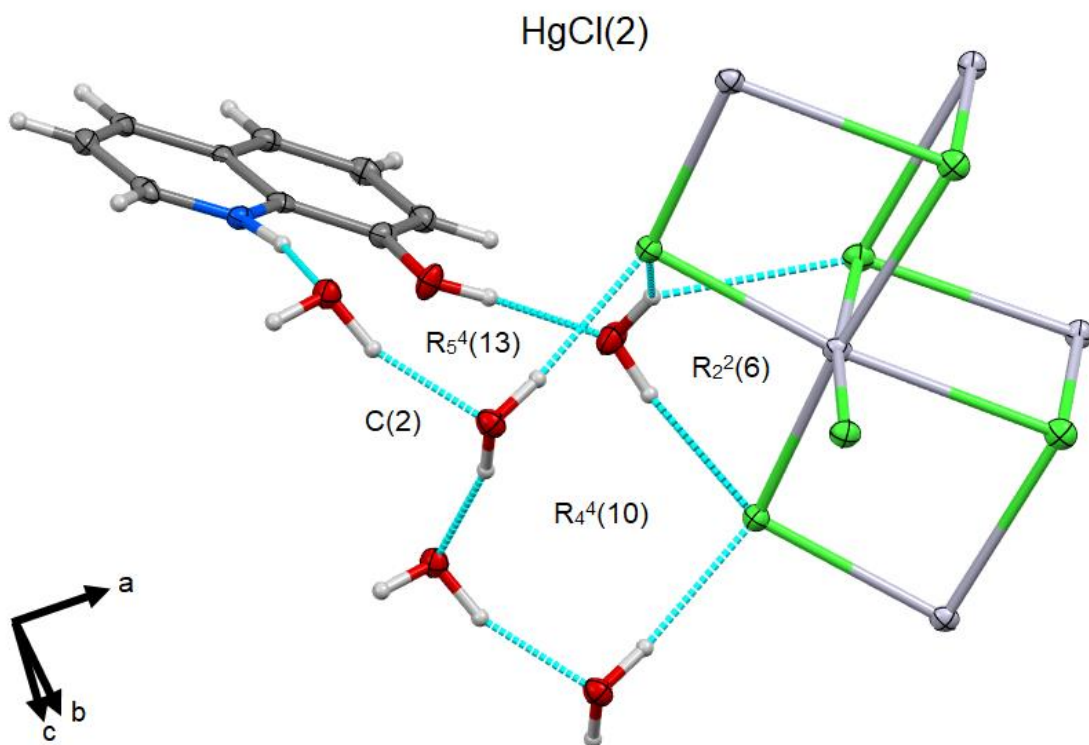

Figure S16. H-bond motifs in the structure of HgCl(2)

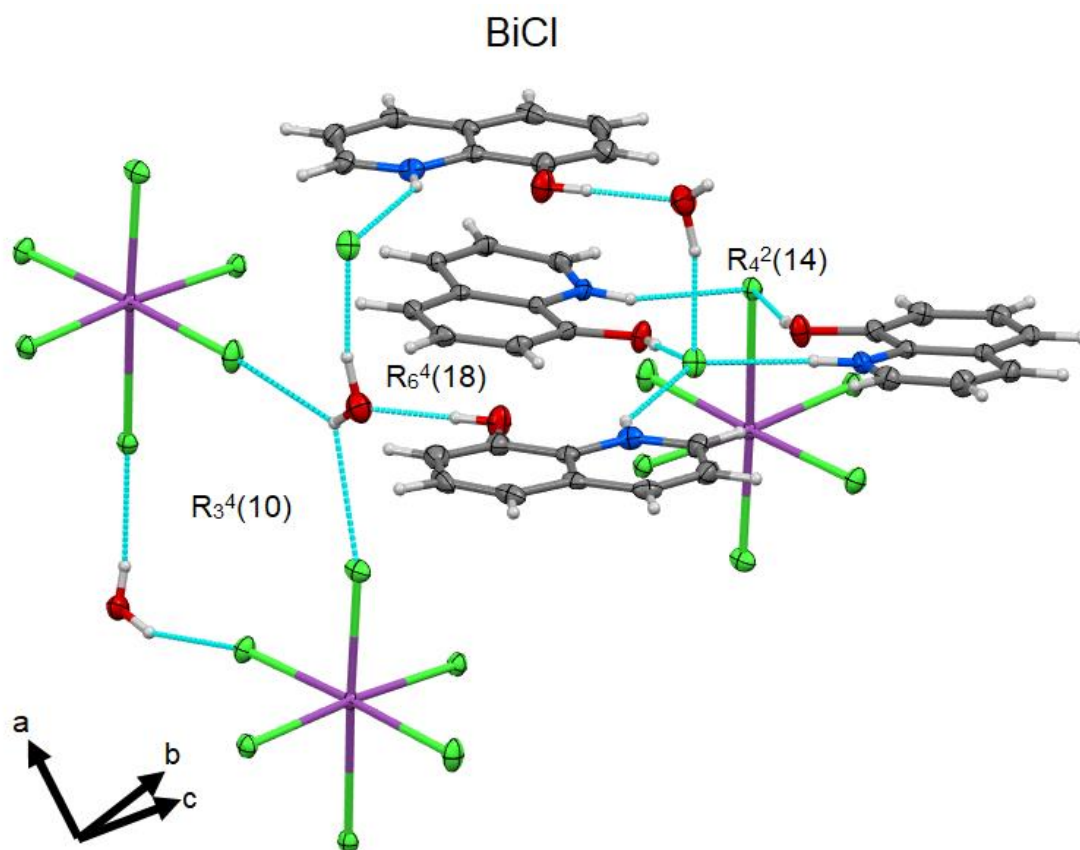

Figure S17. H-bond ring motifs in the structure of BiCl

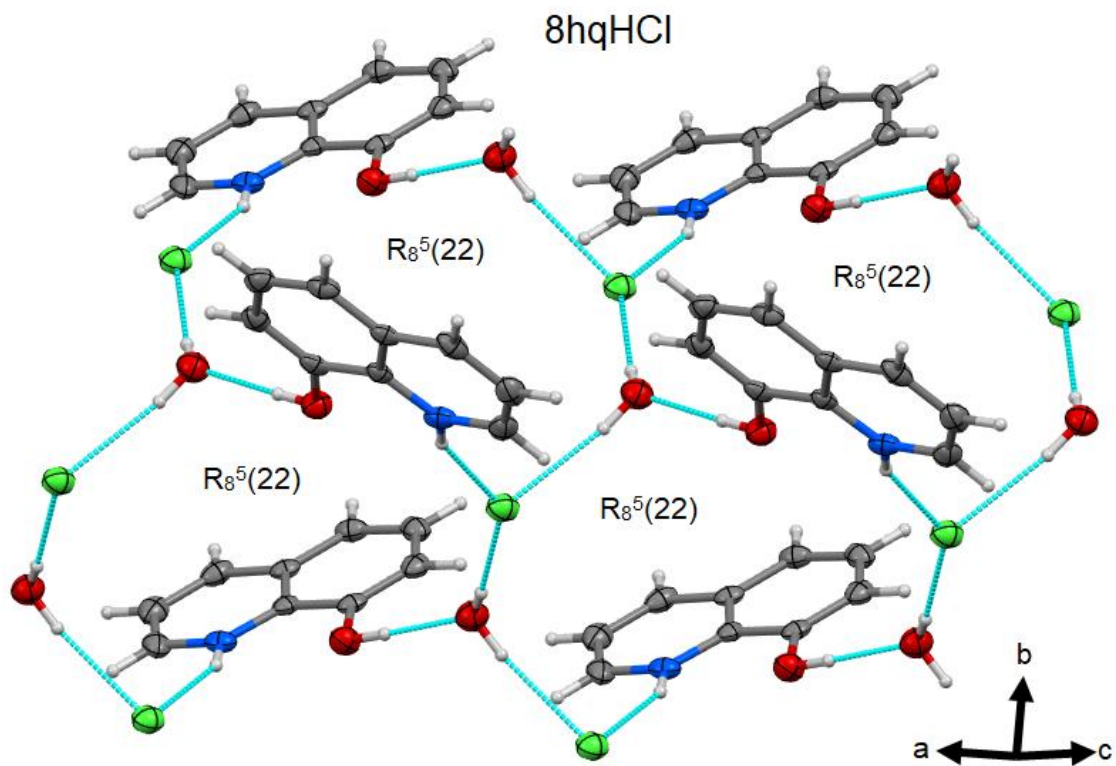

Figure S18. H-bond ring motifs in the structure of 8hqHCl

UV-Vis spectra (Figure S19-S38)

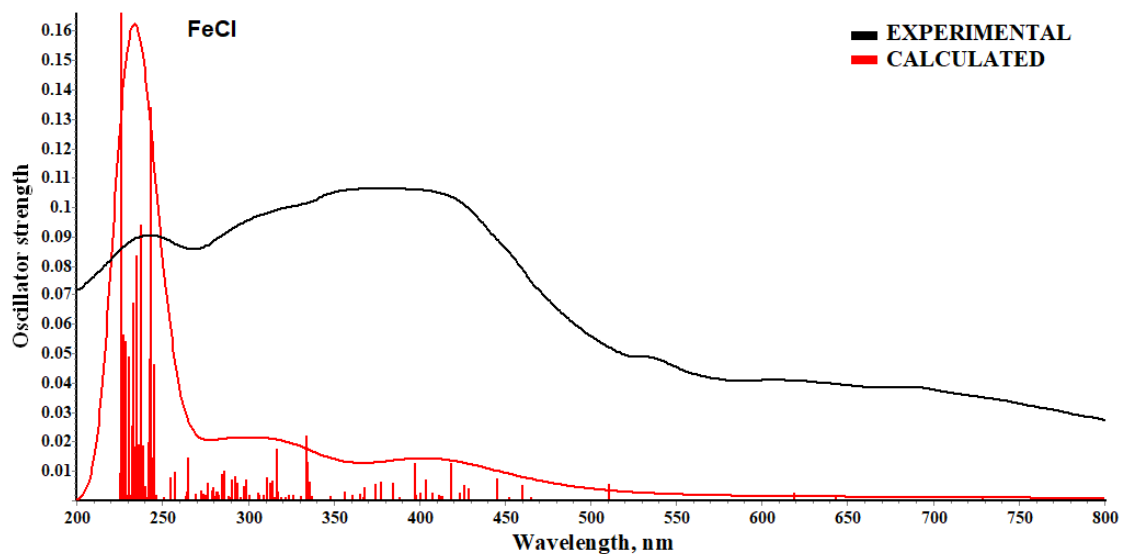

Figure S19. Experimental (black) and calculated (red) UV-Vis spectra of FeCl. The most important oscillator strengths are shown as vertical red lines.

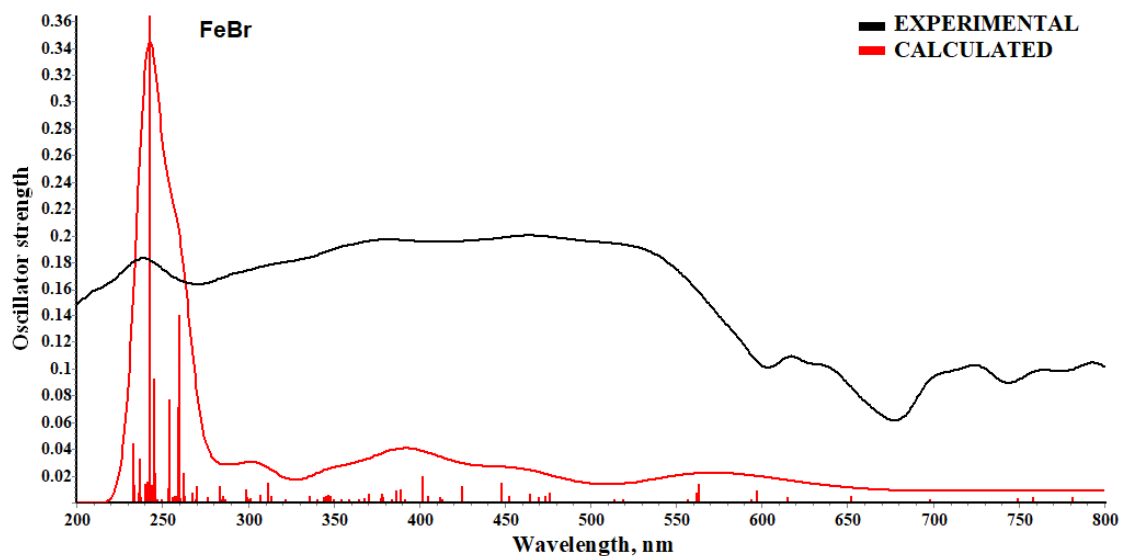

Figure S20. Experimental (black) and calculated (red) UV-Vis spectra of FeBr. The most important oscillator strengths are shown as vertical red lines.

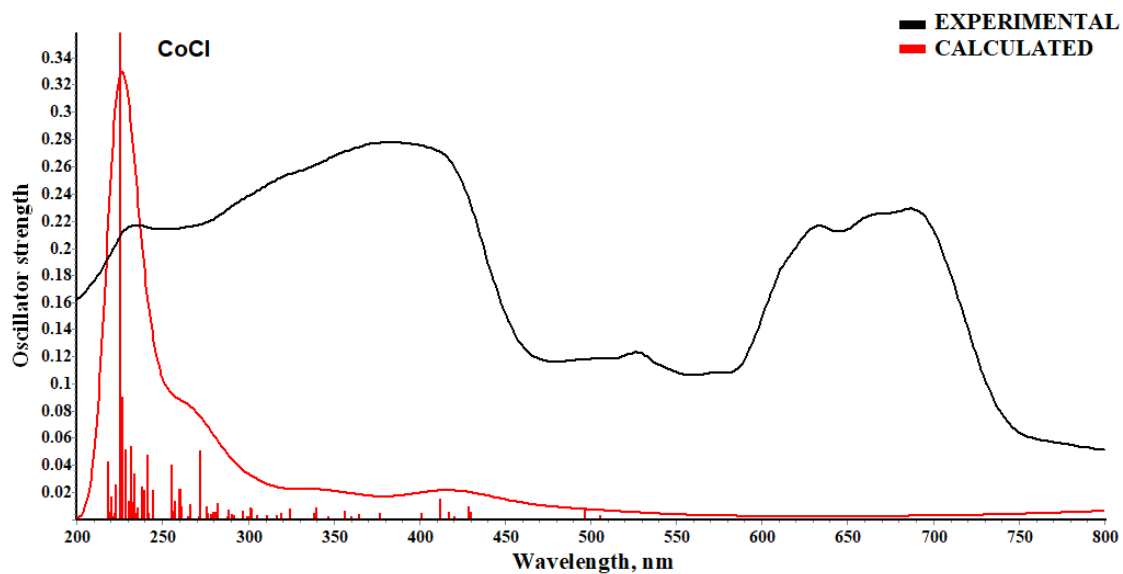

Figure S21. Experimental (black) and calculated (red) UV-Vis spectra of CoCl. The most important oscillator strengths are shown as vertical red lines.

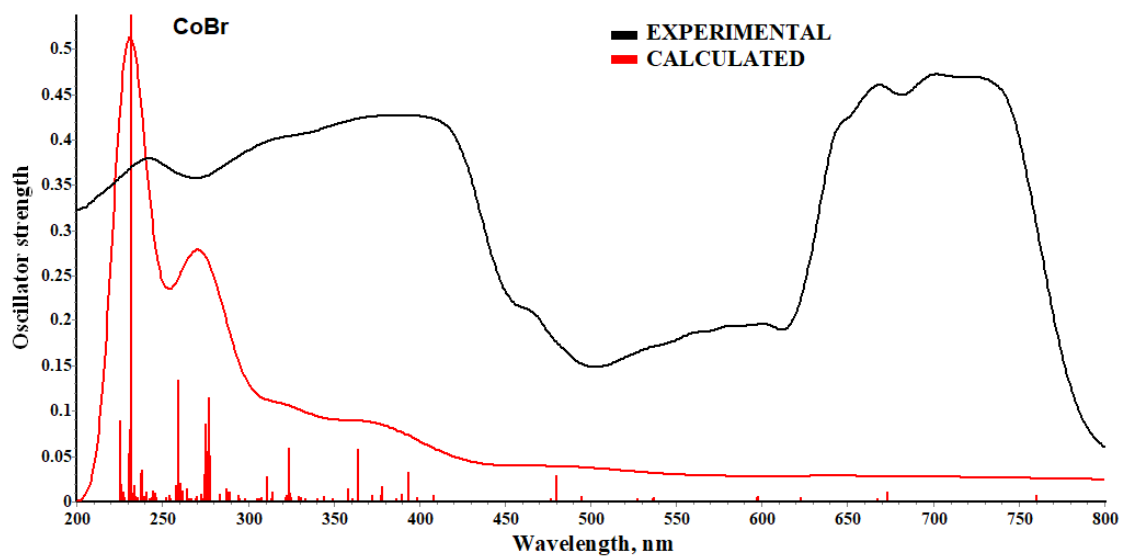

Figure S22. Experimental (black) and calculated (red) UV-Vis spectra of CoBr. The most important oscillator strengths are shown as vertical red lines.

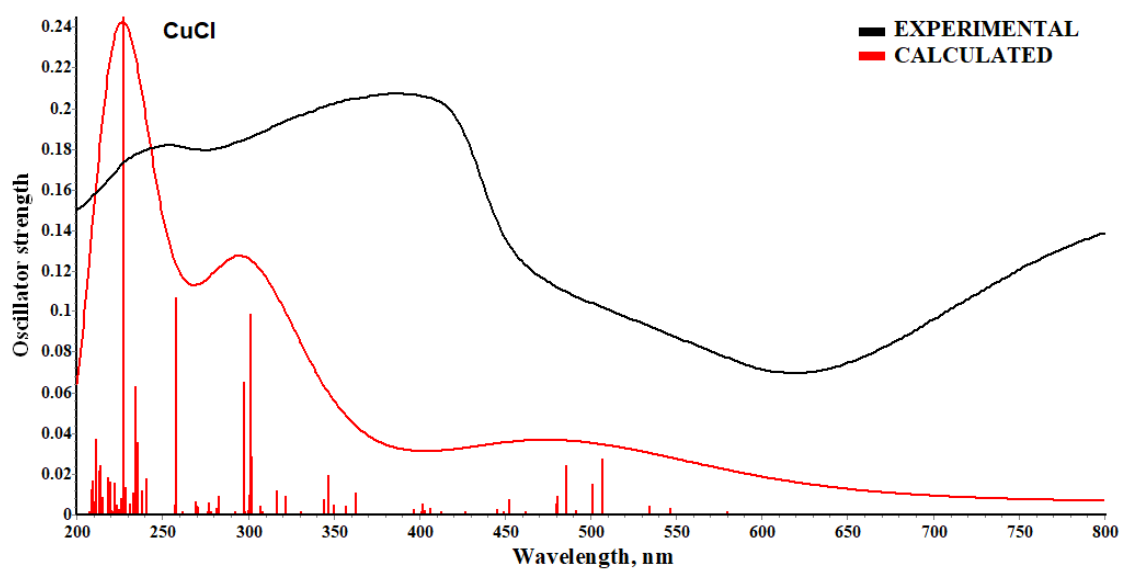

Figure S23. Experimental (black) and calculated (red) UV-Vis spectra of CuCl. The most important oscillator strengths are shown as vertical red lines.

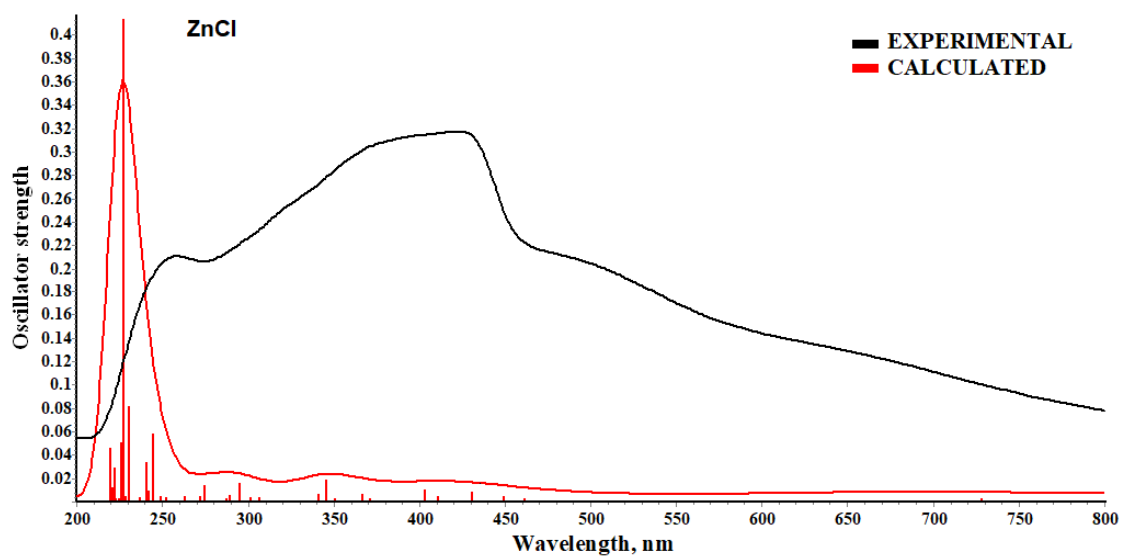

Figure S24. Experimental (black) and calculated (red) UV-Vis spectra of ZnCl. The most important oscillator strengths are shown as vertical red lines.

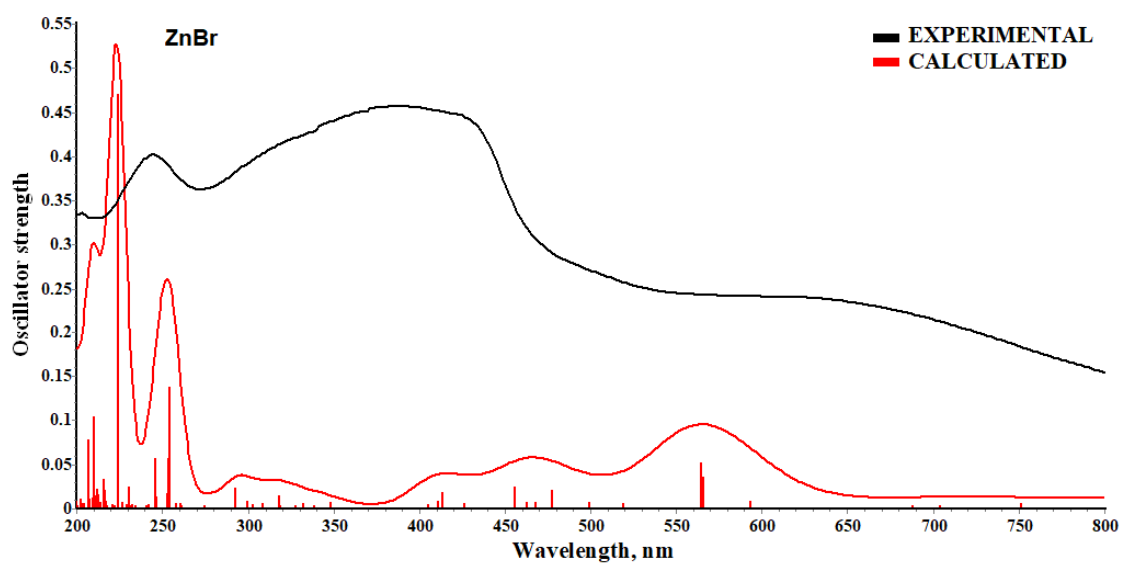

Figure S25. Experimental (black) and calculated (red) UV-Vis spectra of ZnBr. The most important oscillator strengths are shown as vertical red lines.

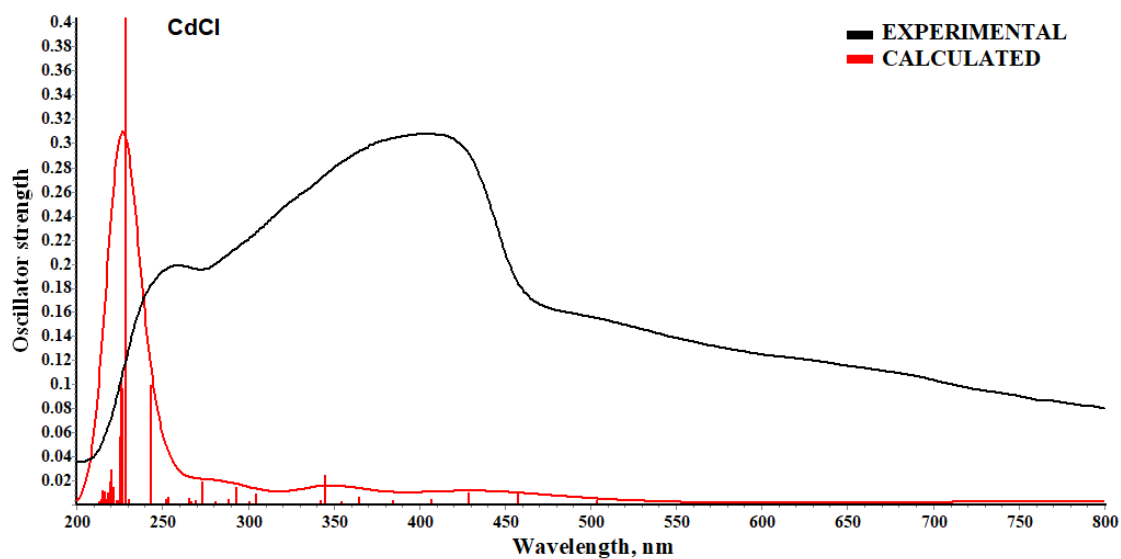

Figure S26. Experimental (black) and calculated (red) UV-Vis spectra of CdCl. The most important oscillator strengths are shown as vertical red lines.

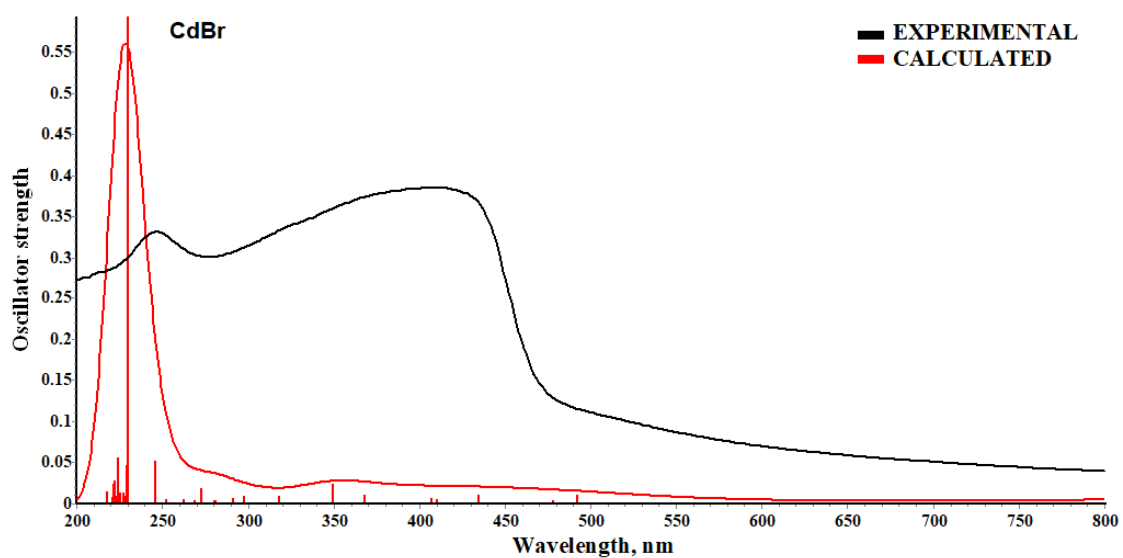

Figure S27. Experimental (black) and calculated (red) UV-Vis spectra of CdBr. The most important oscillator strengths are shown as vertical red lines.

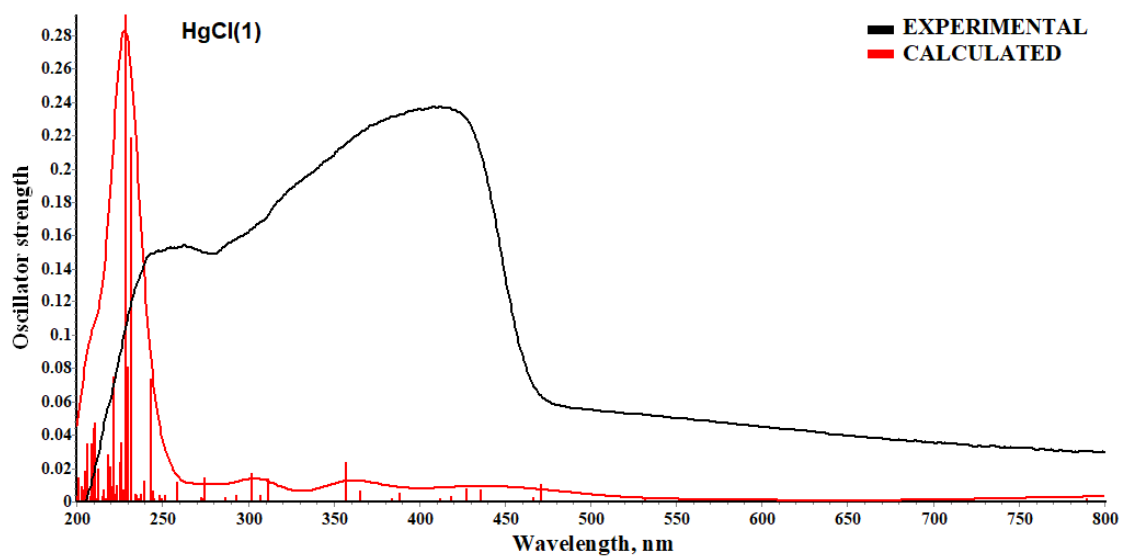

Figure S28. Experimental (black) and calculated (red) UV-Vis spectra of HgCl(1). The most important oscillator strengths are shown as vertical red lines.

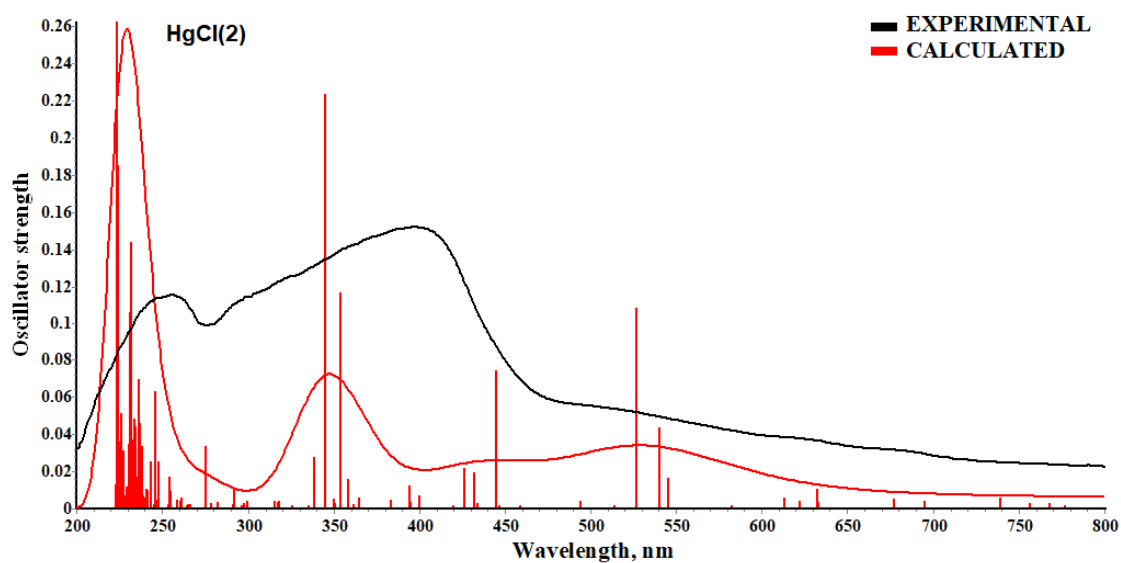

Figure S29. Experimental (black) and calculated (red) UV-Vis spectra of HgCl(2). The most important oscillator strengths are shown as vertical red lines.

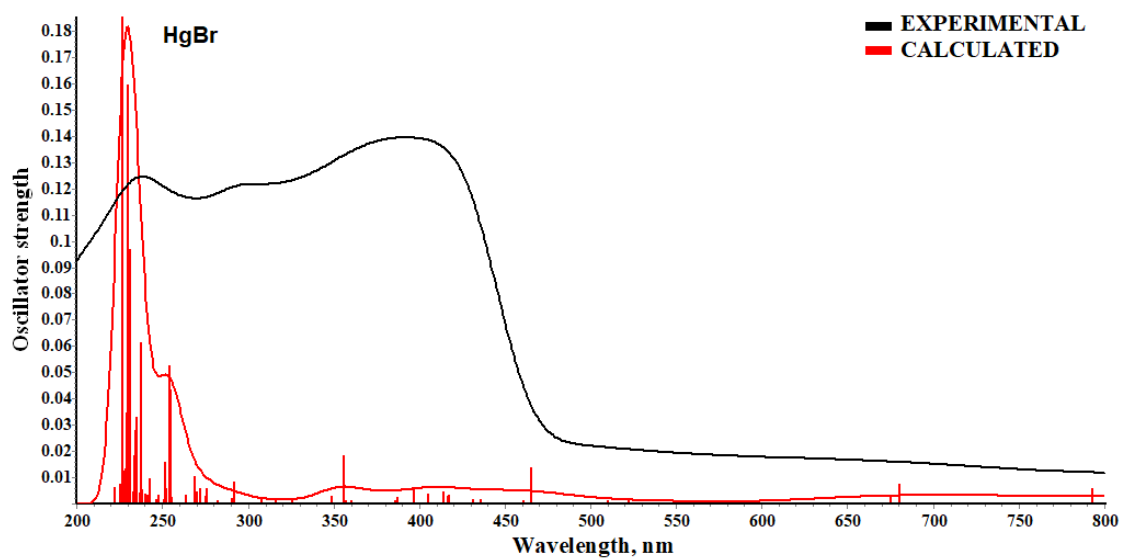

Figure S30. Experimental (black) and calculated (red) UV-Vis spectra of HgBr. The most important oscillator strengths are shown as vertical red lines.



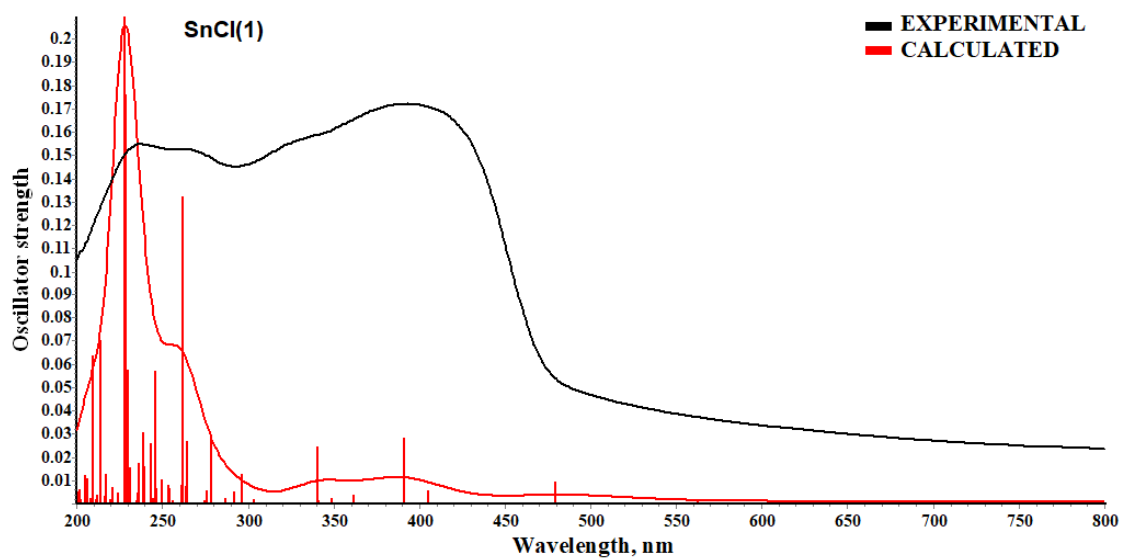

Figure S31. Experimental (black) and calculated (red) UV-Vis spectra of SnCl(1). The most important oscillator strengths are shown as vertical red lines.

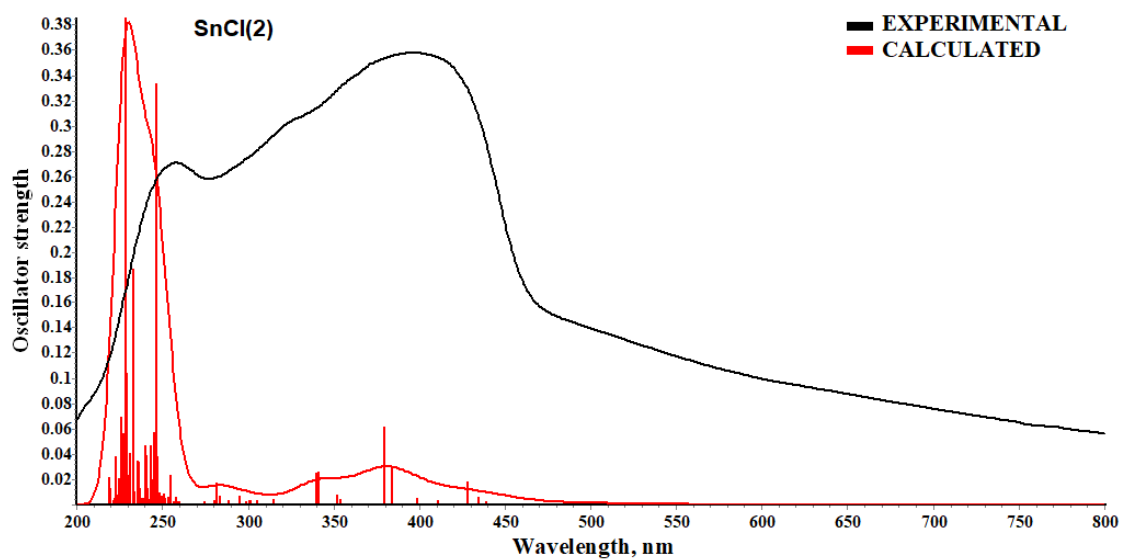

Figure S32. Experimental (black) and calculated (red) UV-Vis spectra of SnCl(2). The most important oscillator strengths are shown as vertical red lines.

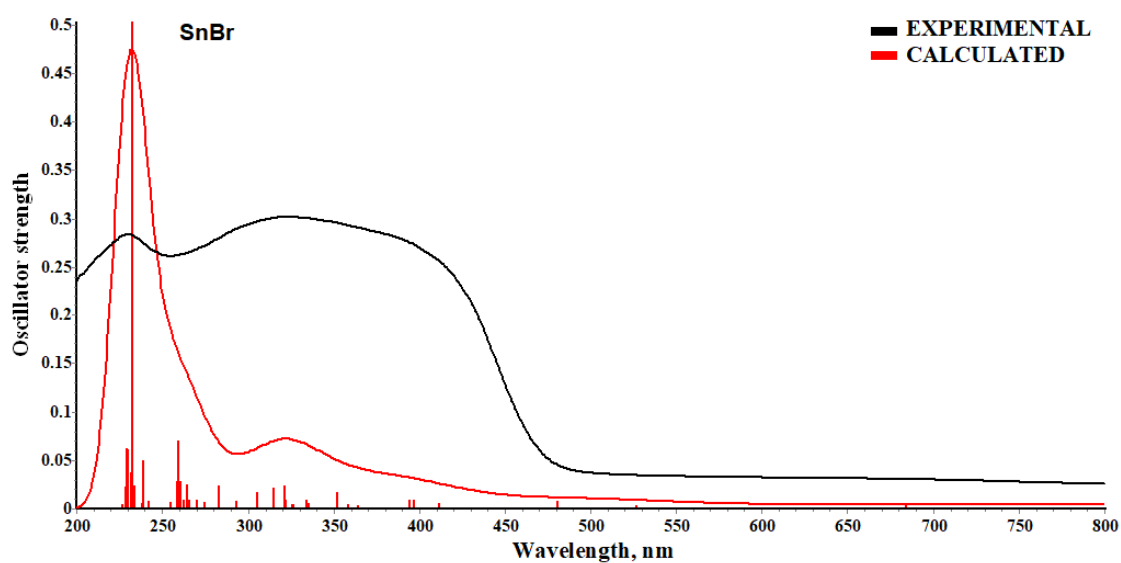

Figure S33. Experimental (black) and calculated (red) UV-Vis spectra of SnBr. The most important oscillator strengths are shown as vertical red lines.

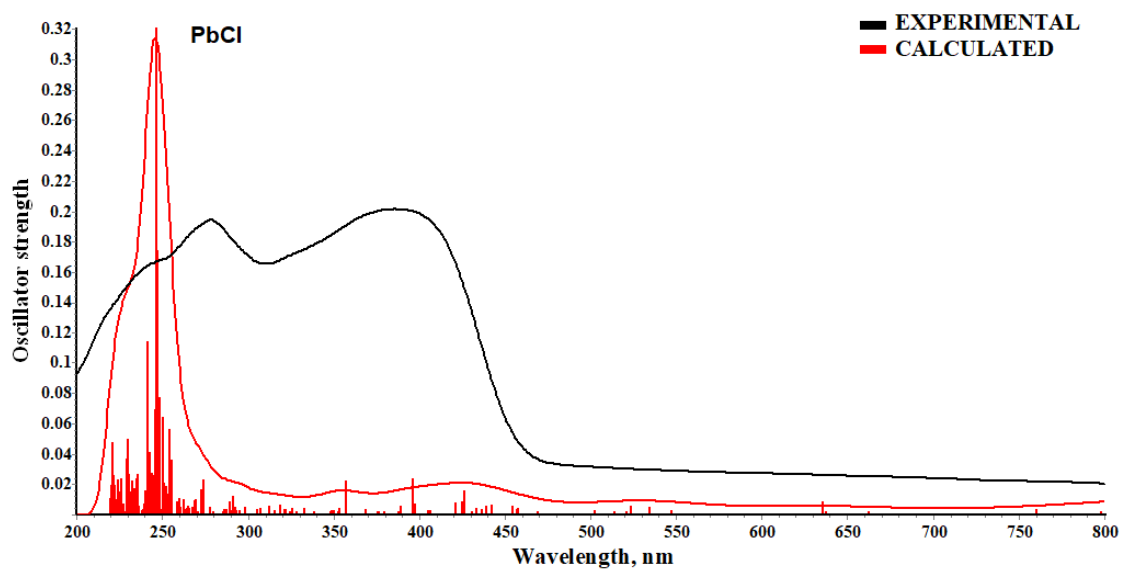

Figure S34. Experimental (black) and calculated (red) UV-Vis spectra of PbCl. The most important oscillator strengths are shown as vertical red lines.

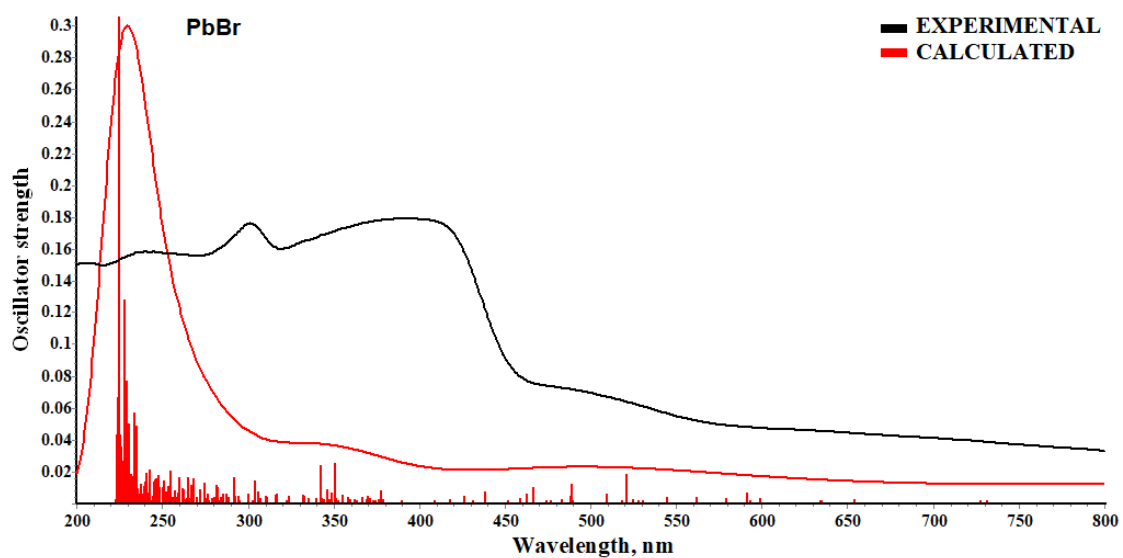

Figure S35. Experimental (black) and calculated (red) UV-Vis spectra of PbBr. The most important oscillator strengths are shown as vertical red lines.

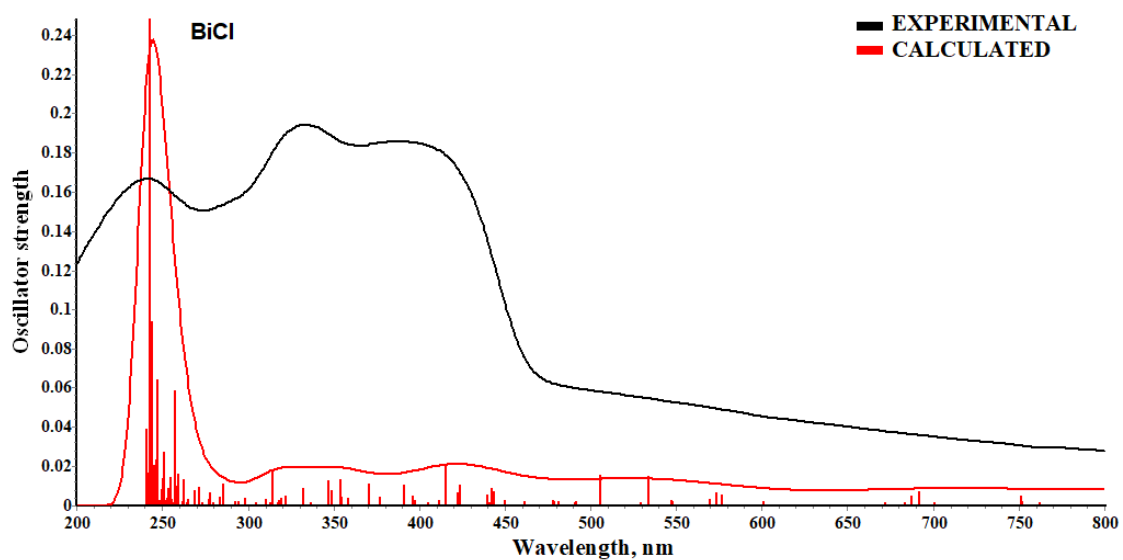

Figure S36. Experimental (black) and calculated (red) UV-Vis spectra of BiCl. The most important oscillator strengths are shown as vertical red lines.

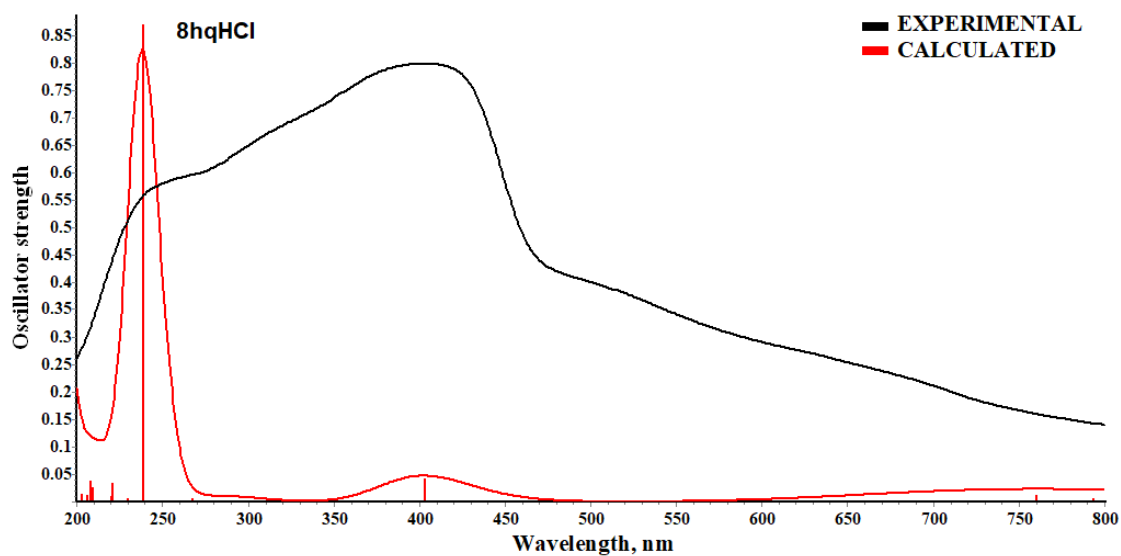

Figure S37. Experimental (black) and calculated (red) UV-Vis spectra of 8hqHCl. The most important oscillator strengths are shown as vertical red lines.

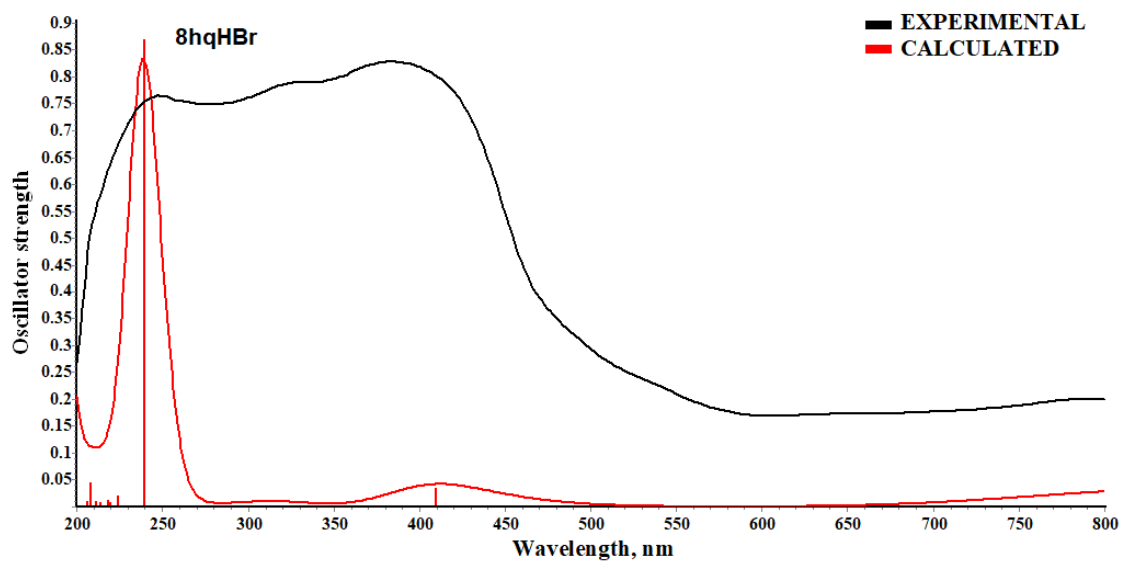

Figure S38. Experimental (black) and calculated (red) UV-Vis spectra of 8hqHBr. The most important oscillator strengths are shown as vertical red lines.

Calculated molecular orbitals of the studied compounds, corresponding to Tables S6-S8. (Figure S39-S56). H letter indicates HOMO, L - LUMO, and +/- (number) represents subsequent orbitals below HOMO and above LUMO, respectively

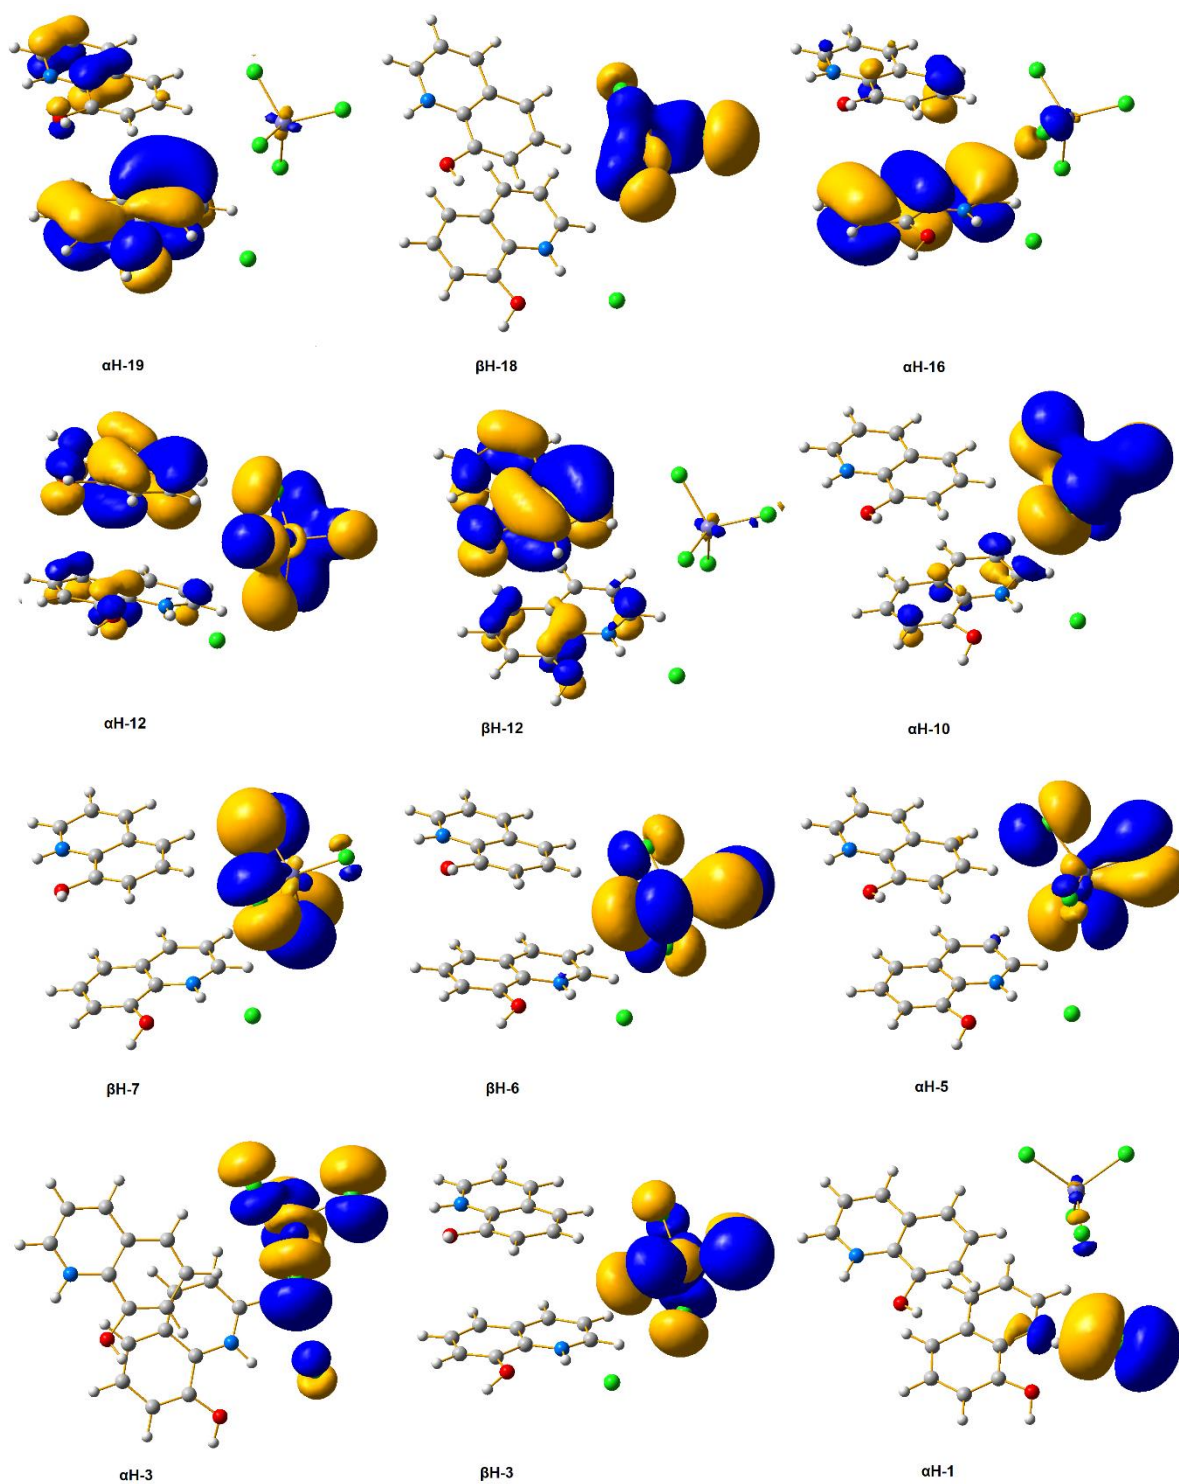

Figure S39. Molecular orbitals of the compound FeCl.

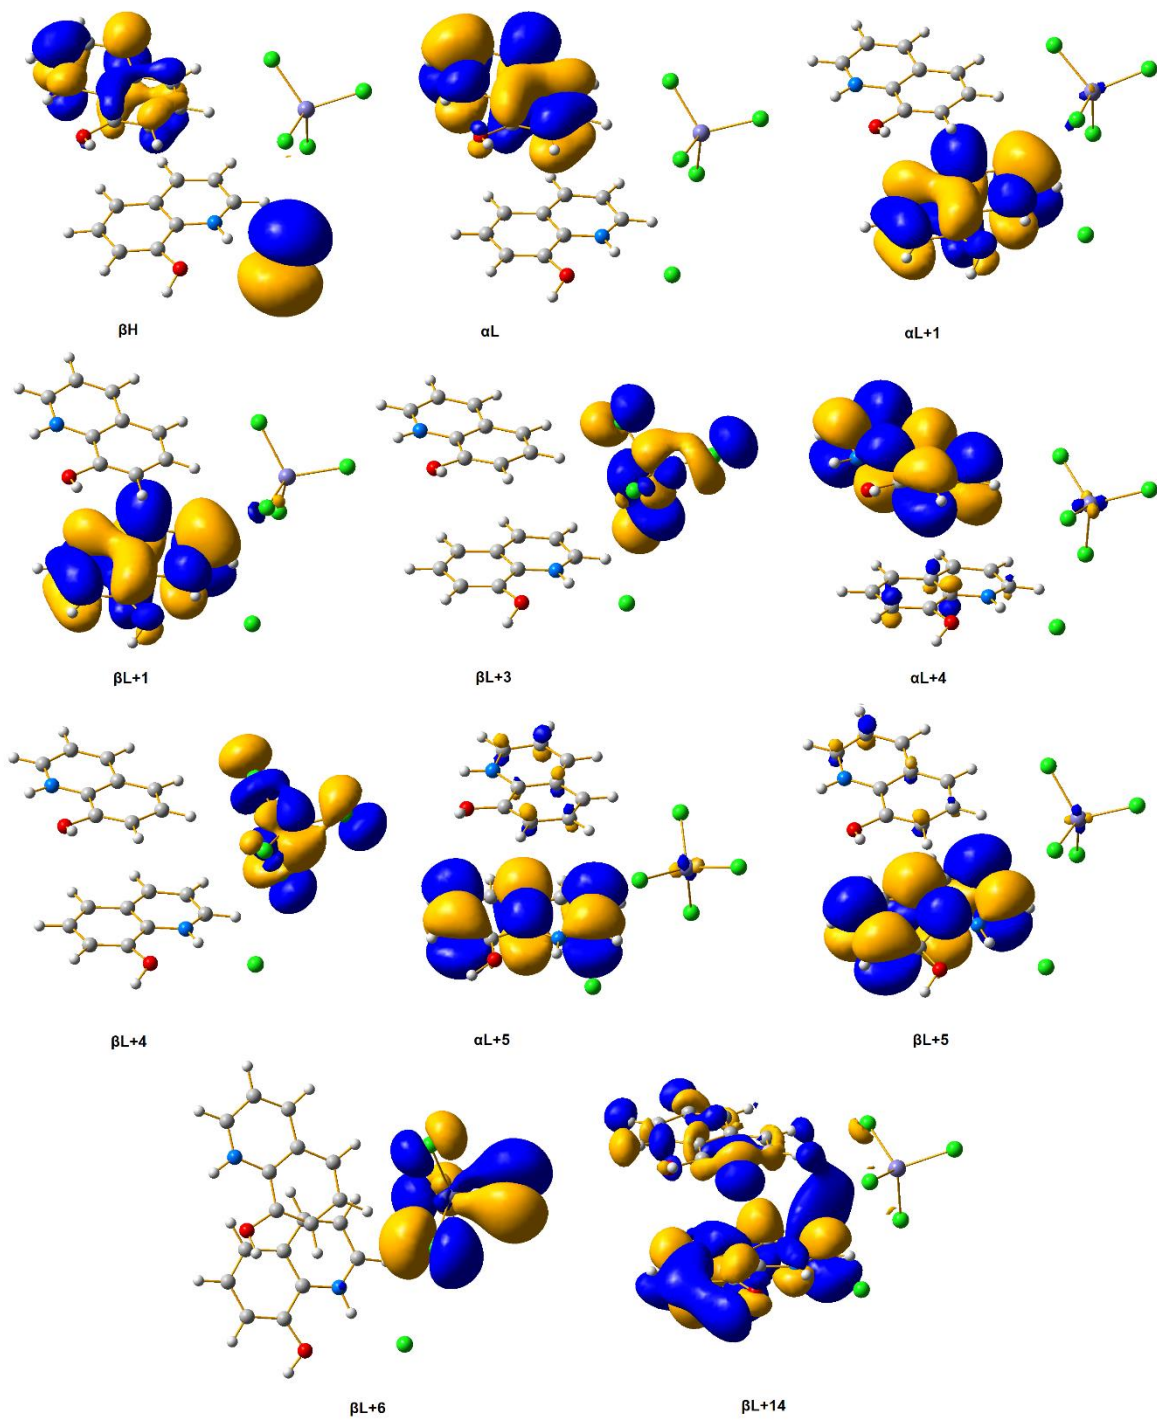

Figure S39. *continued.*

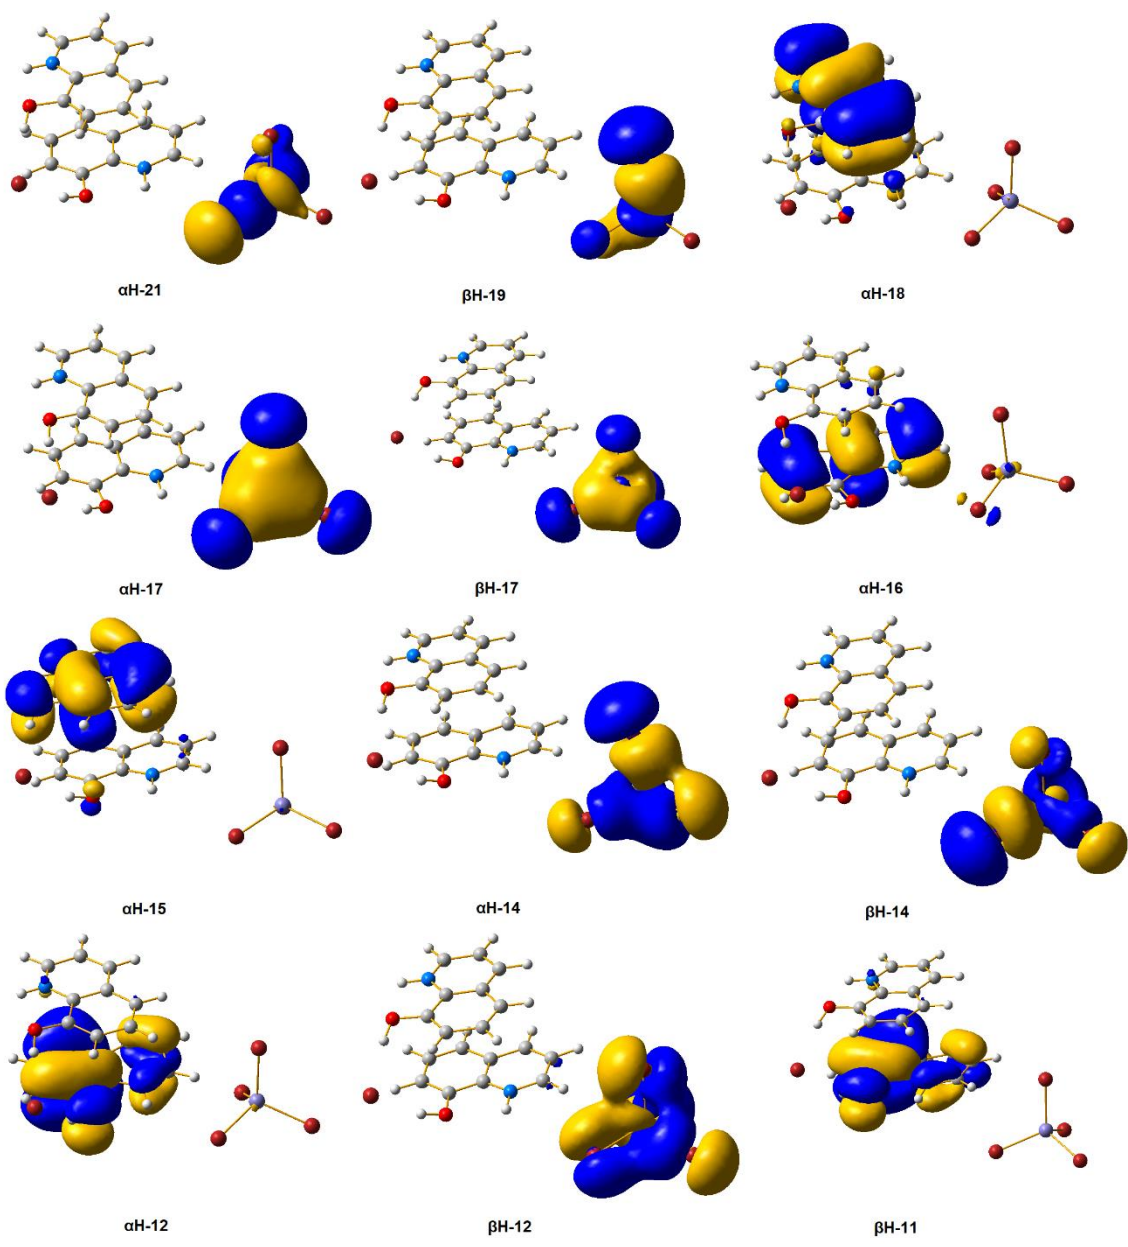

Figure S40. Molecular orbitals of the compound FeBr.



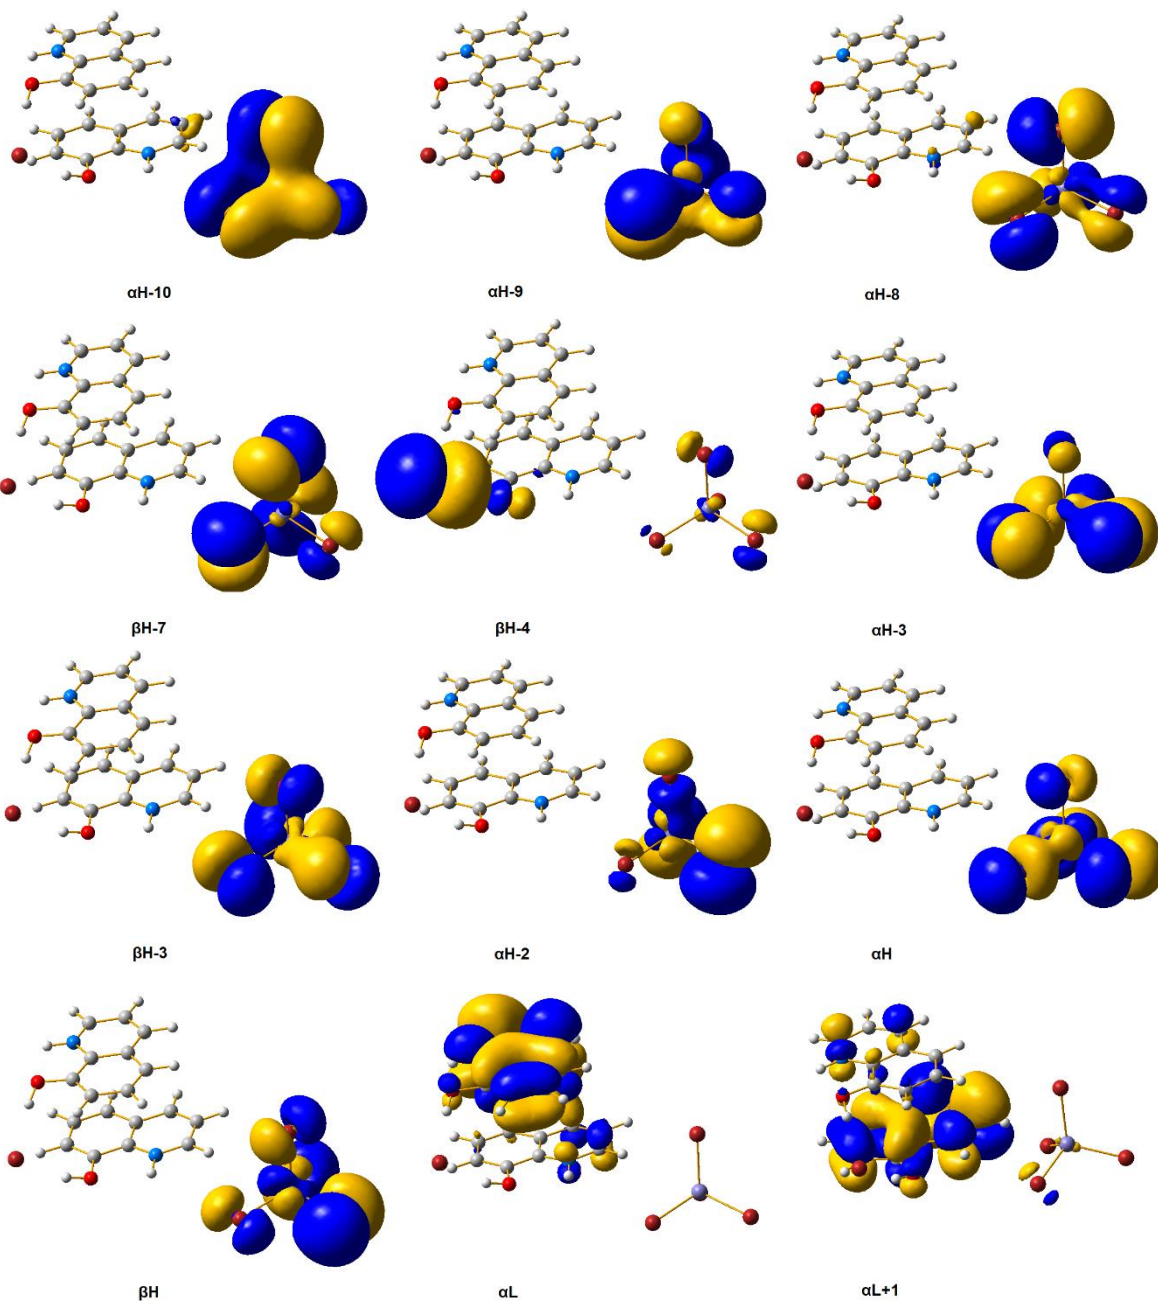

Figure S40. *continued*



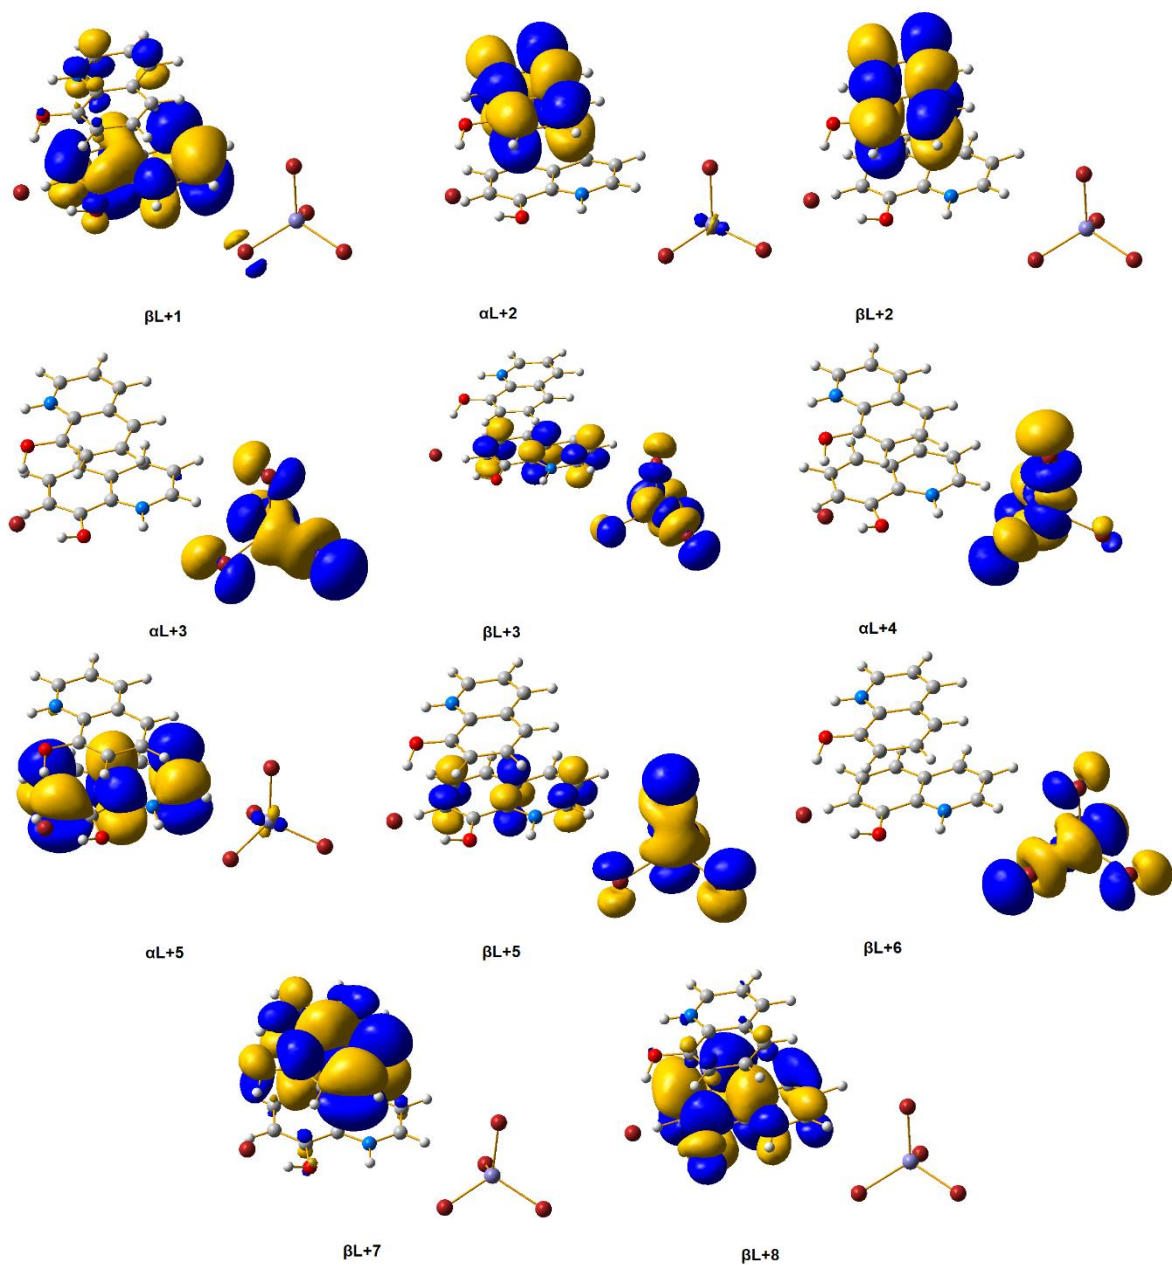

Figure S40. *continued.*

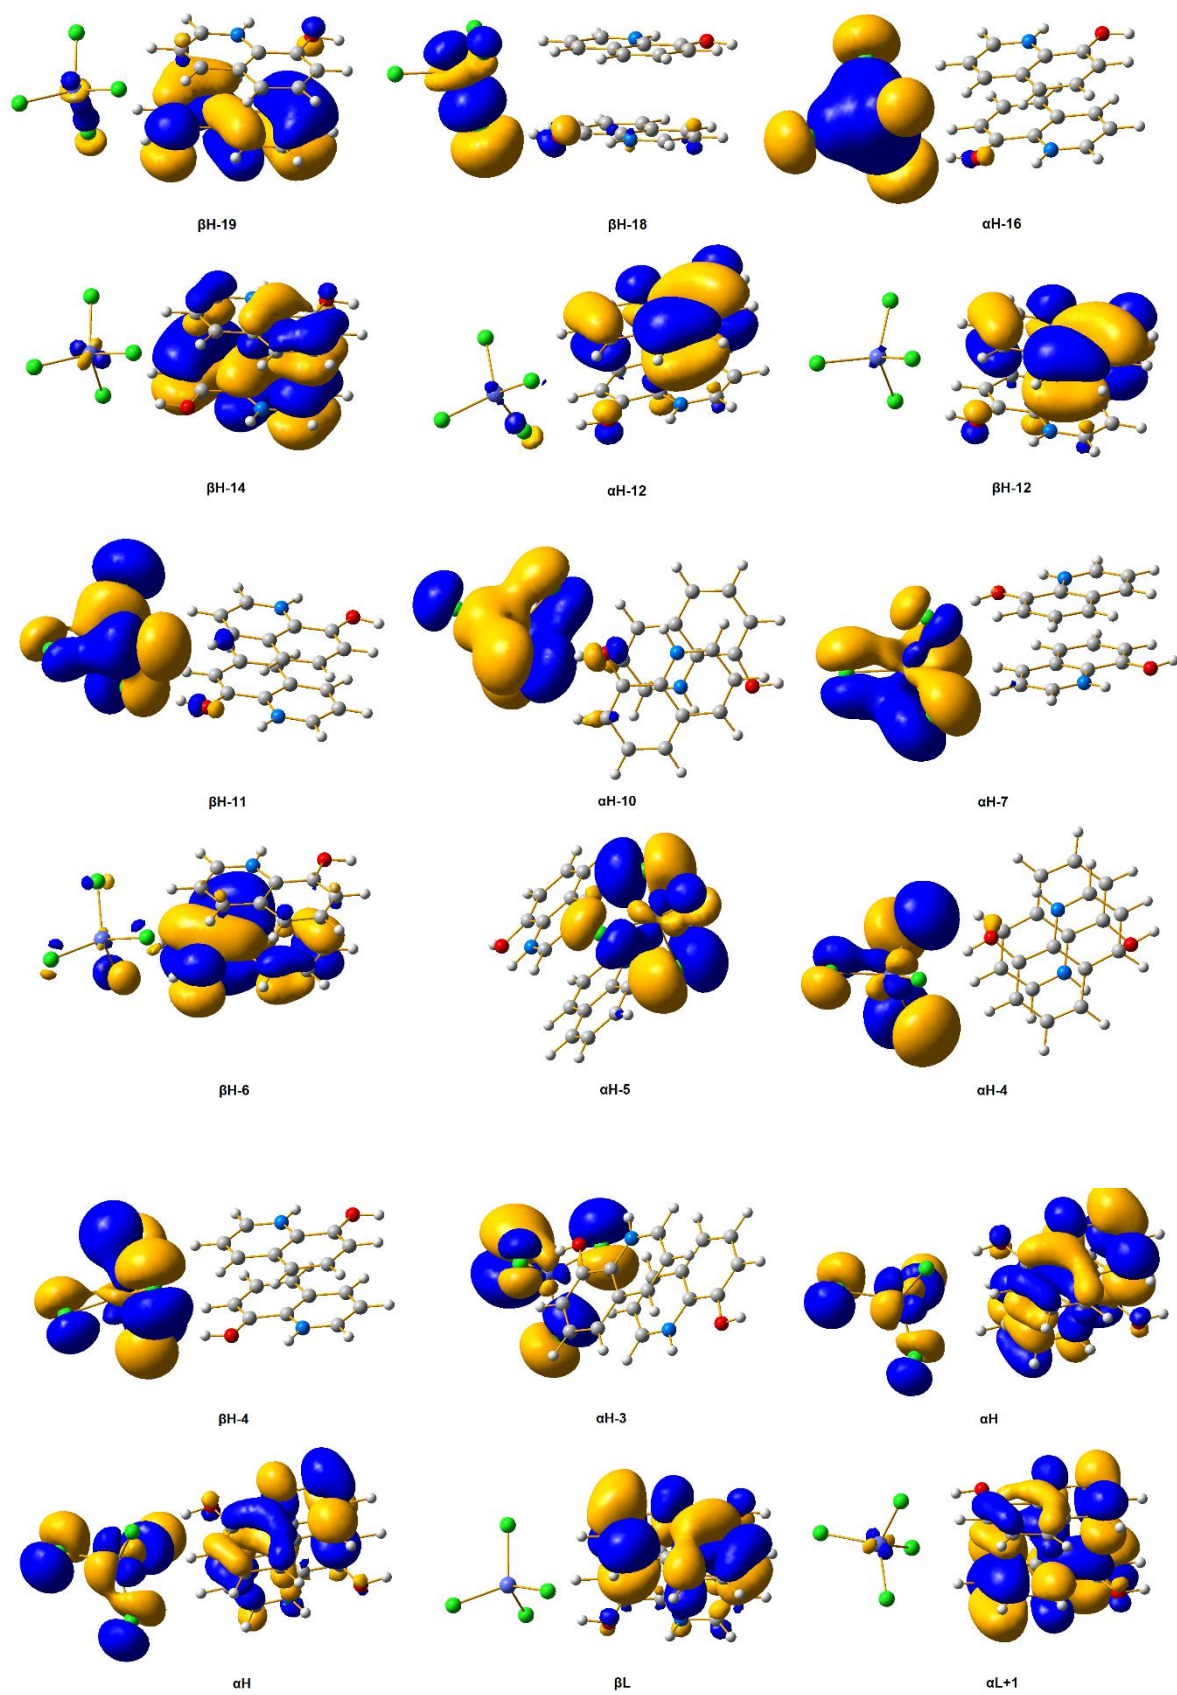

Figure S41. Molecular orbitals of the compound CoCl.

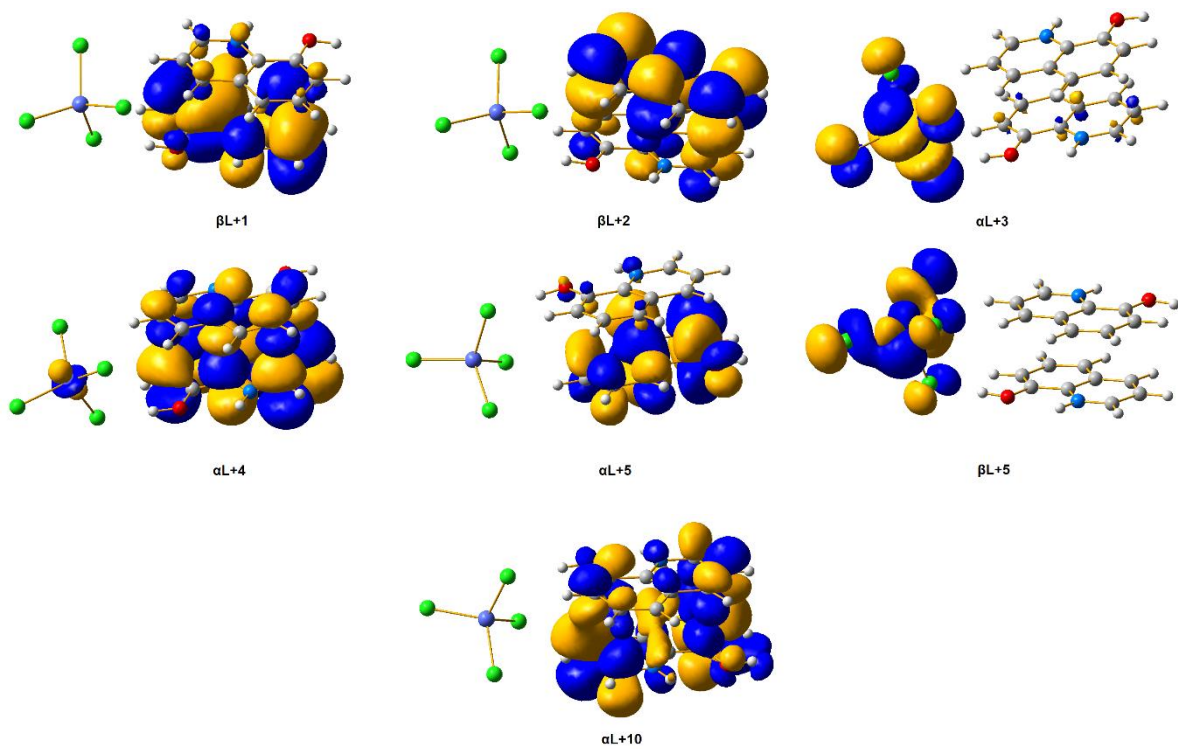

Figure S41. *continued.*

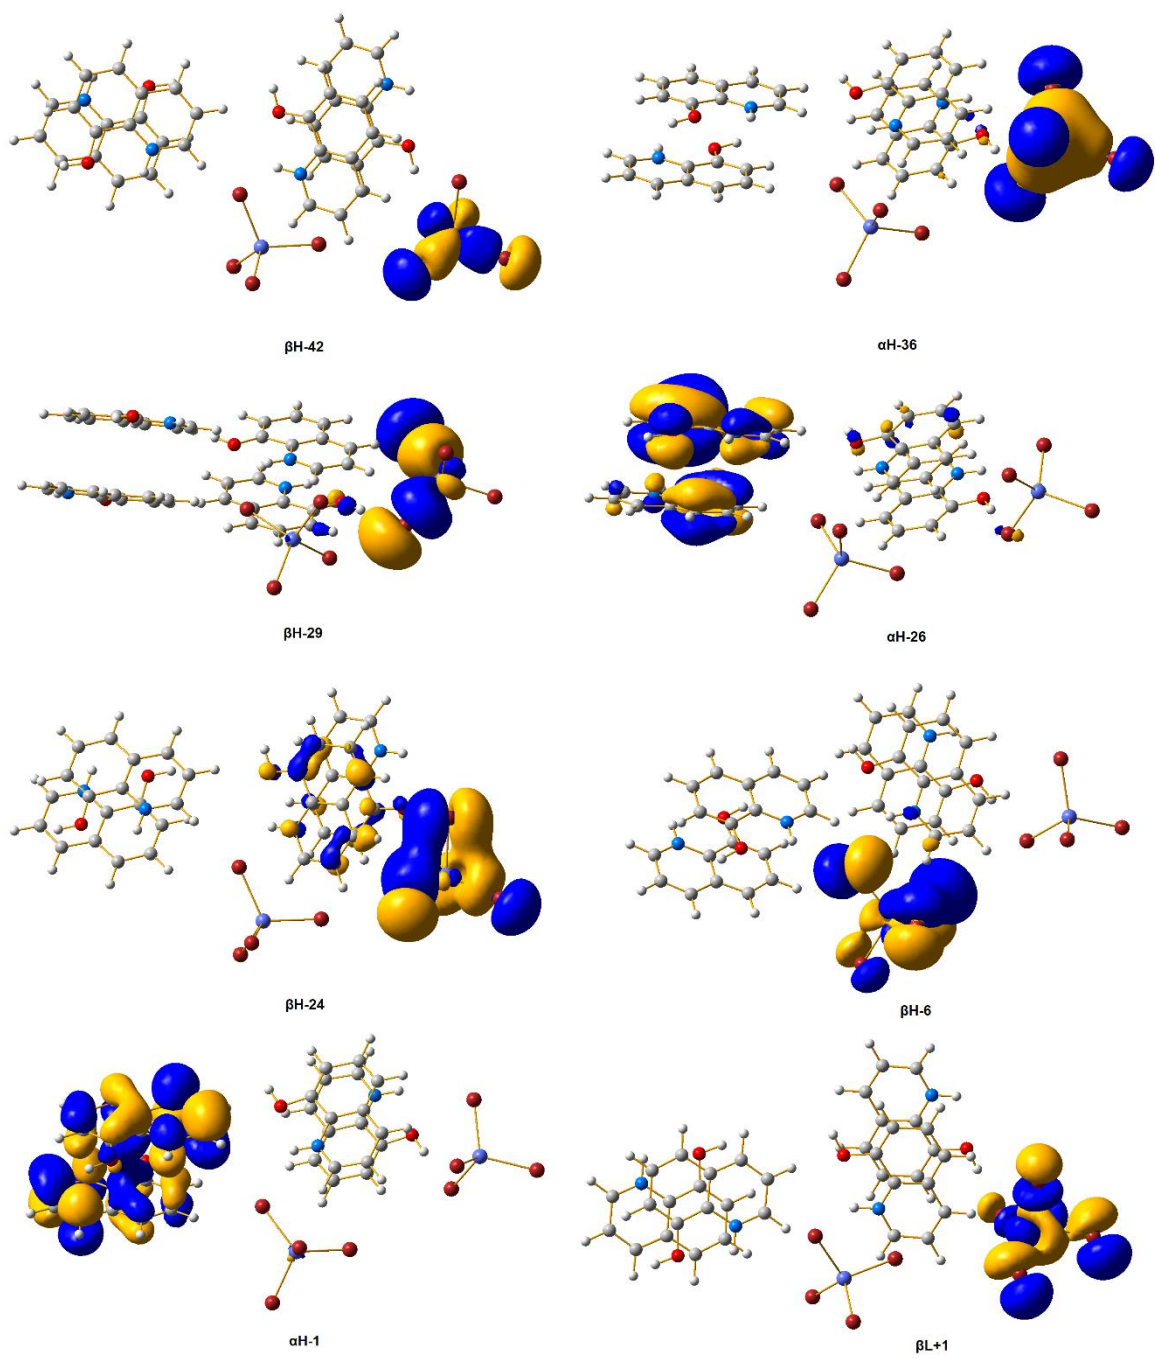

Figure S42. Molecular orbitals of the compound CoBr.



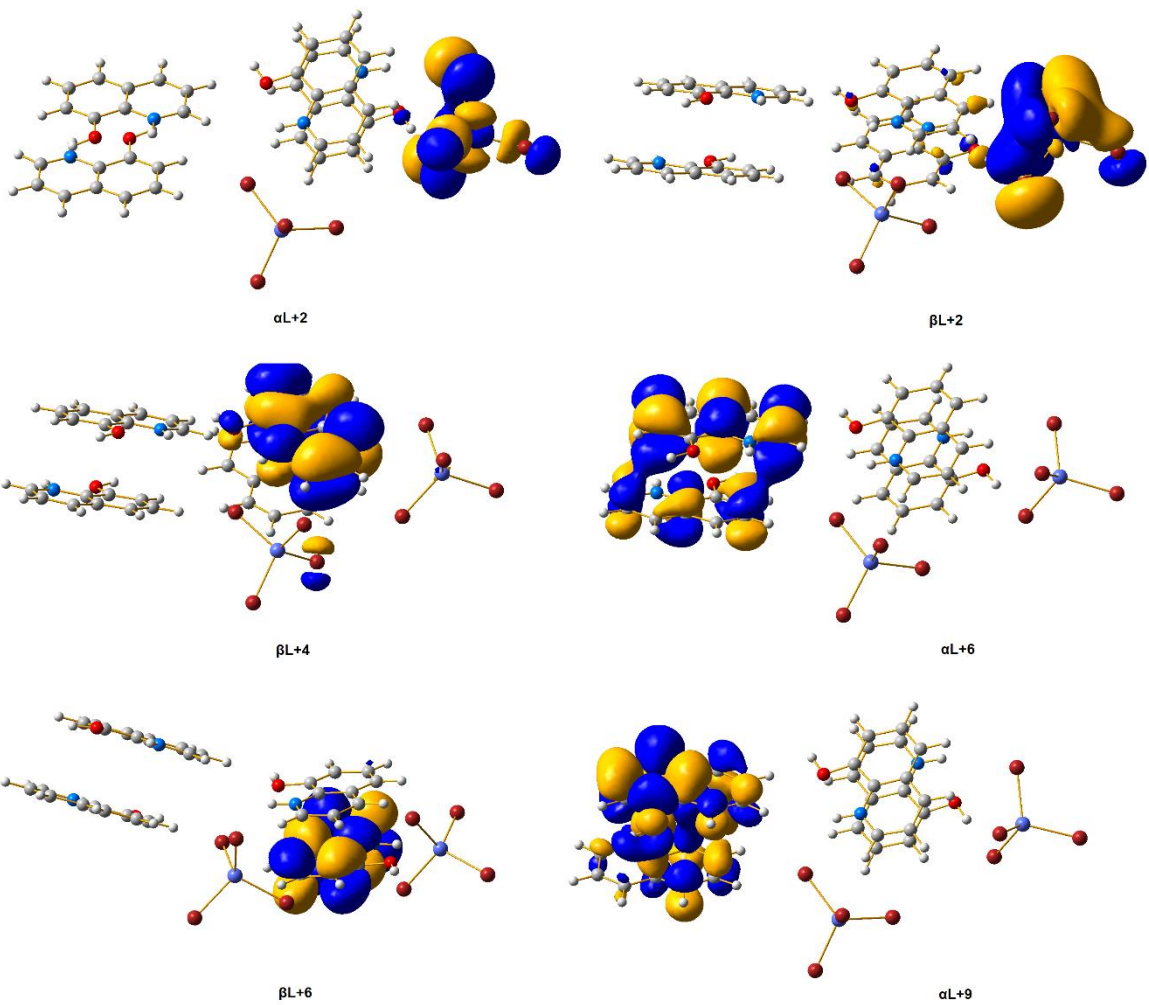

Figure S42. *continued*

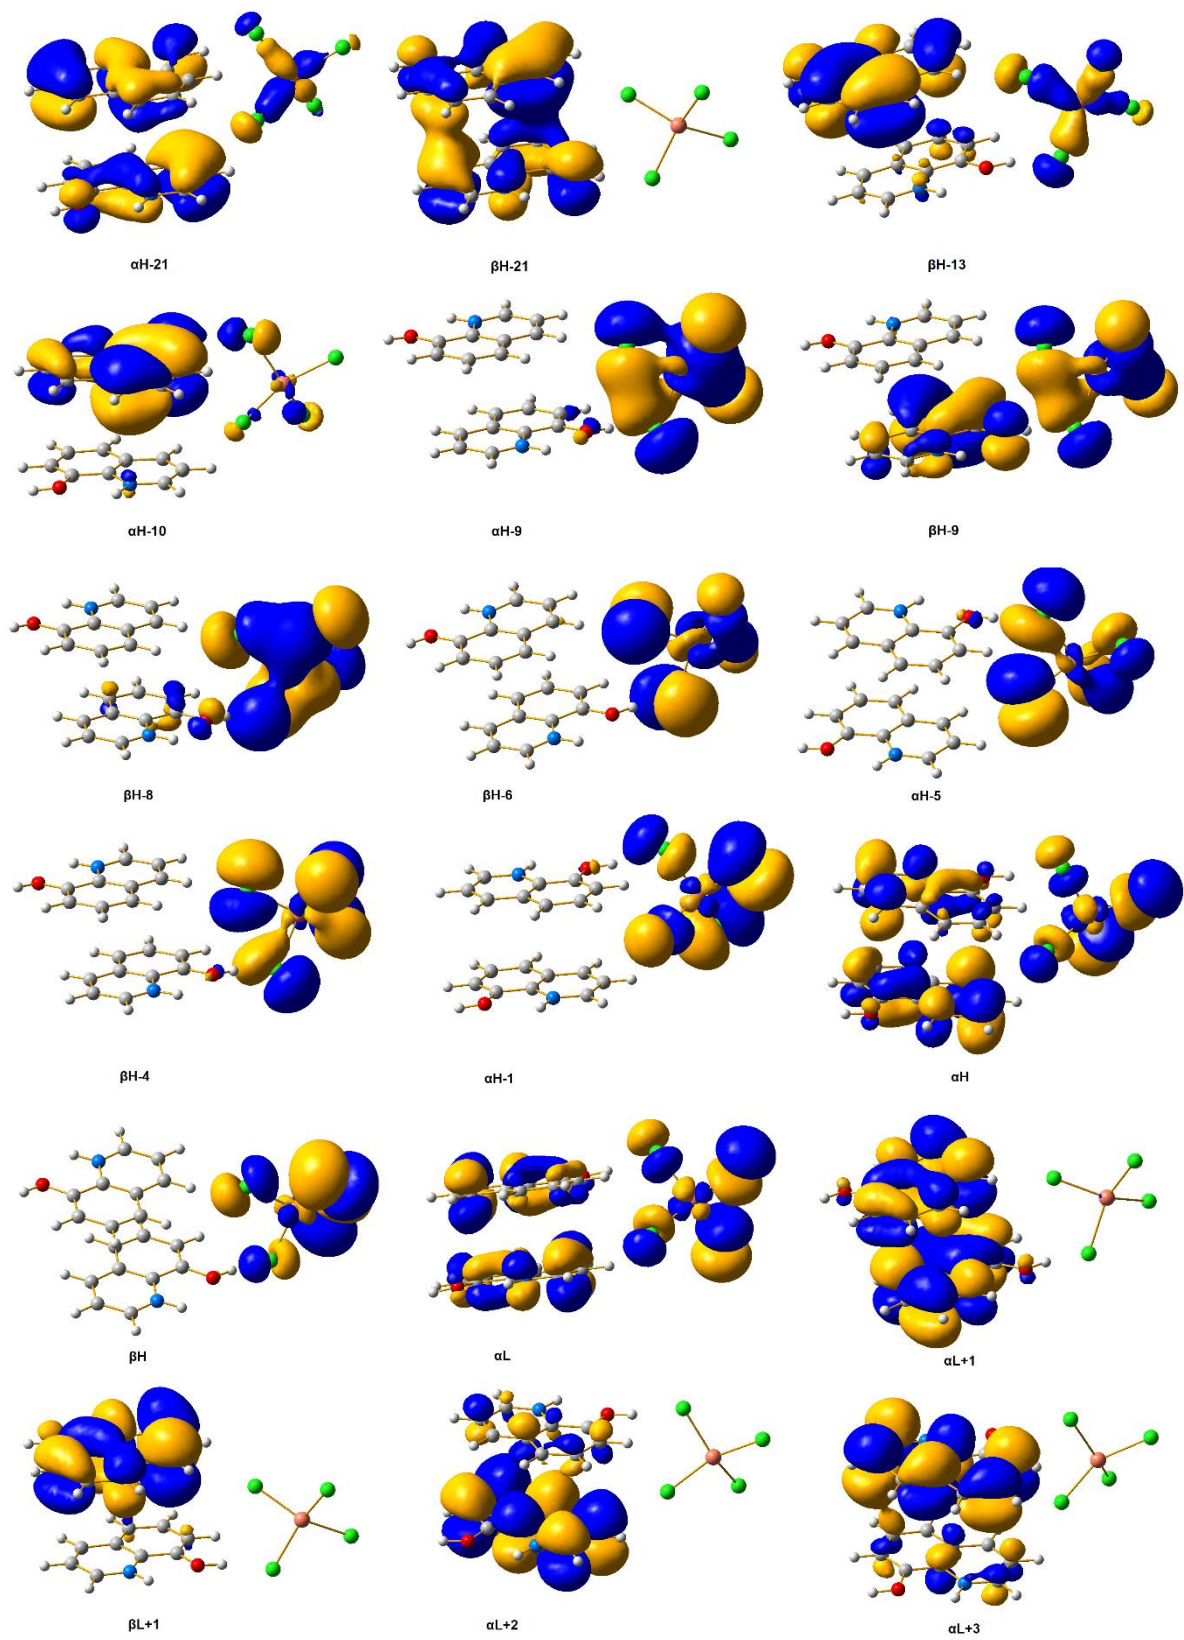

Figure S43. Molecular orbitals of the compound CuCl.

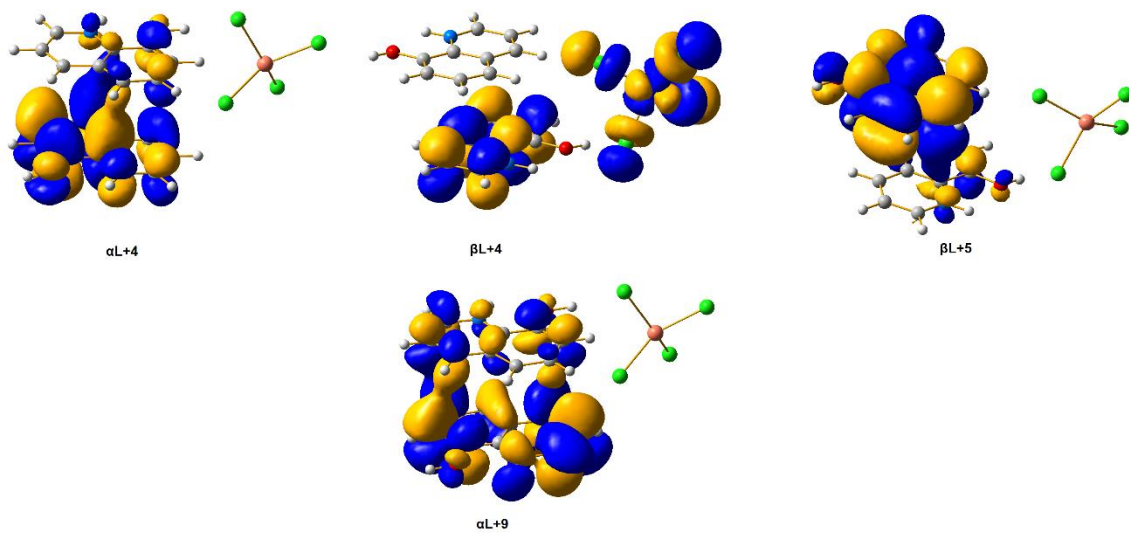

Figure S43. *Continued*

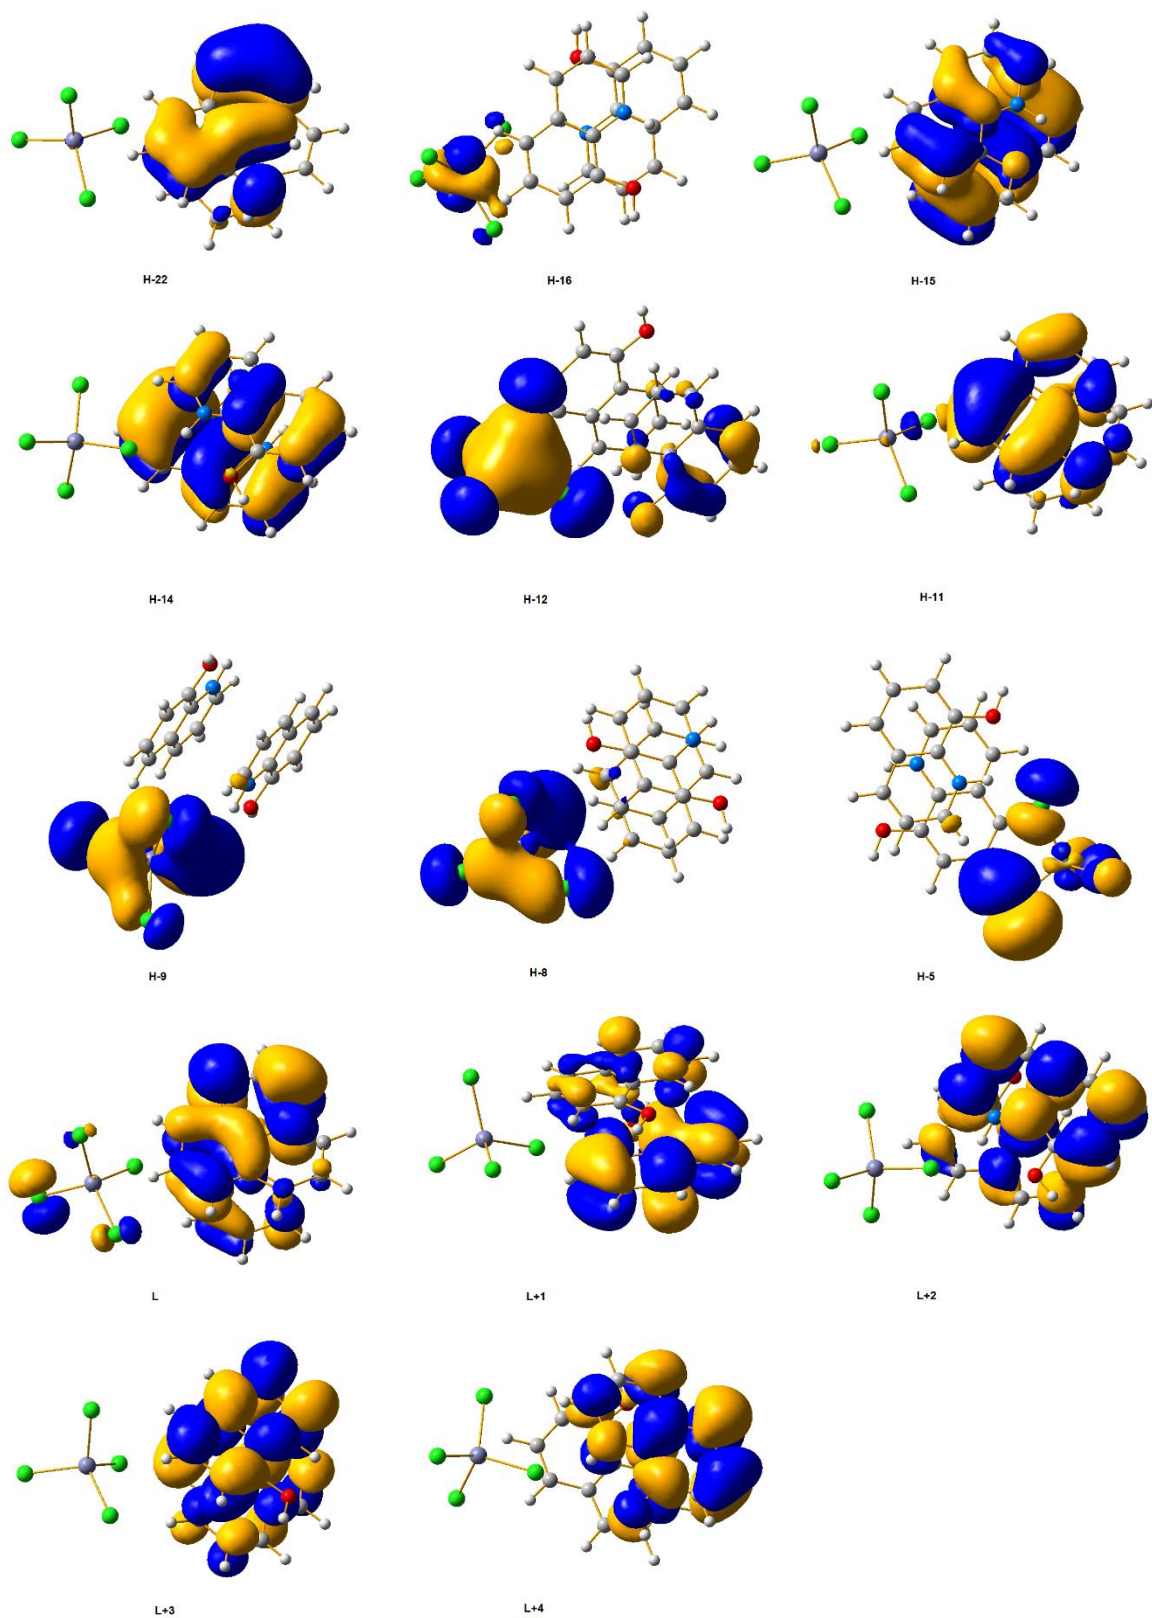

Figure S44. Molecular orbitals of the compound ZnCl.



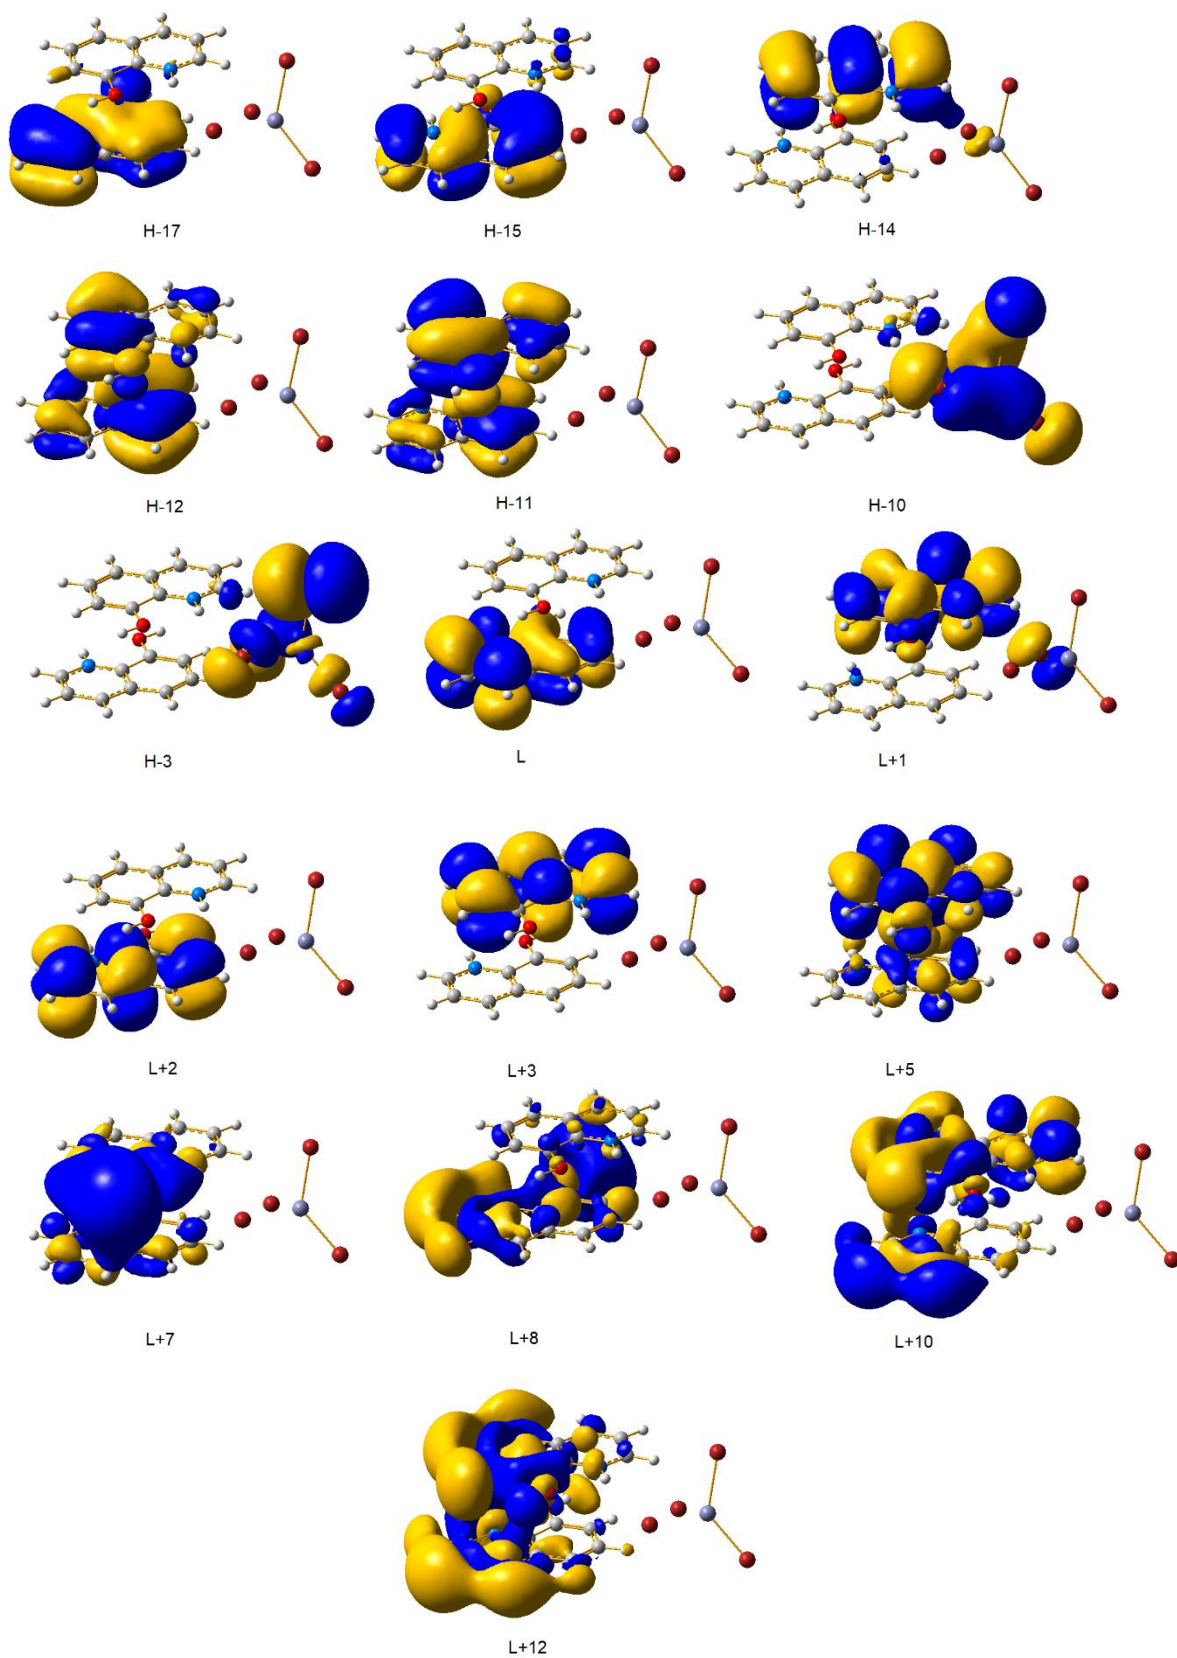

Figure S45. Molecular orbitals of the compound ZnBr.

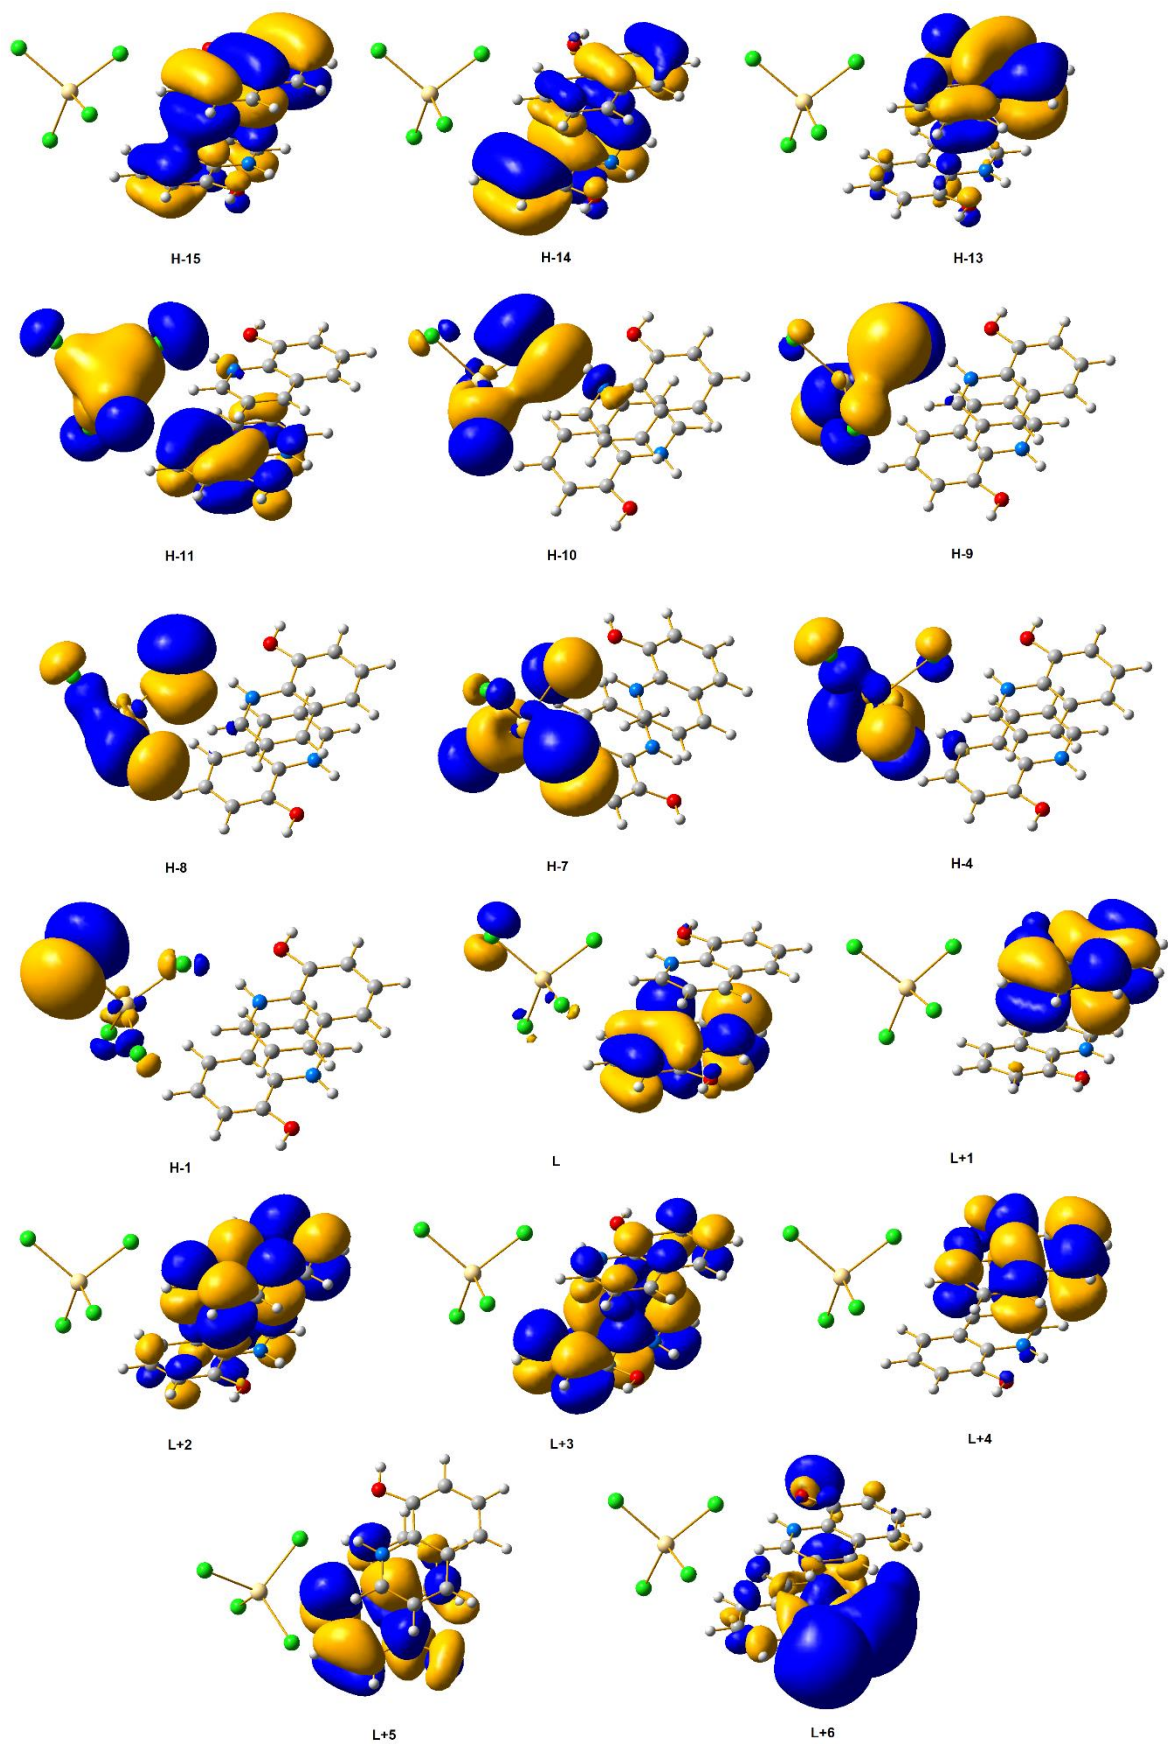

Figure S46. Molecular orbitals of the compound CdCl.

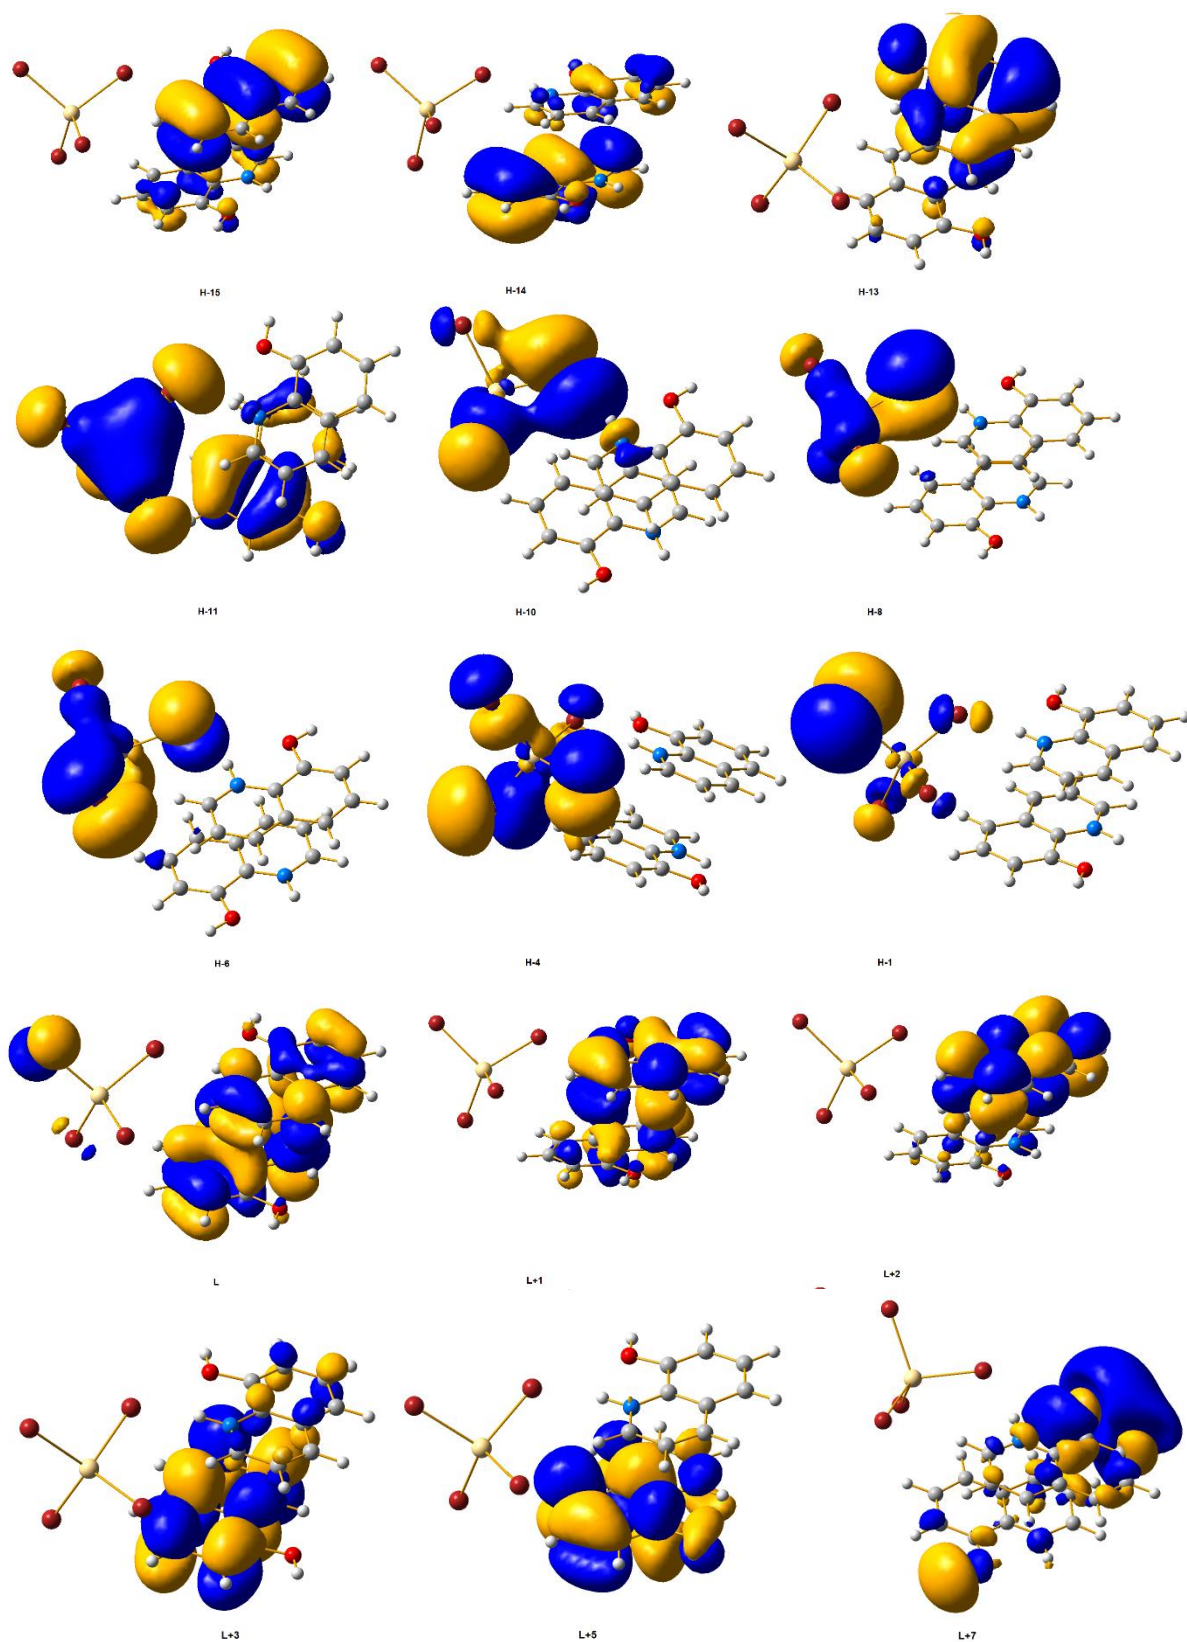

Figure S47. Molecular orbitals of the compound CdBr.



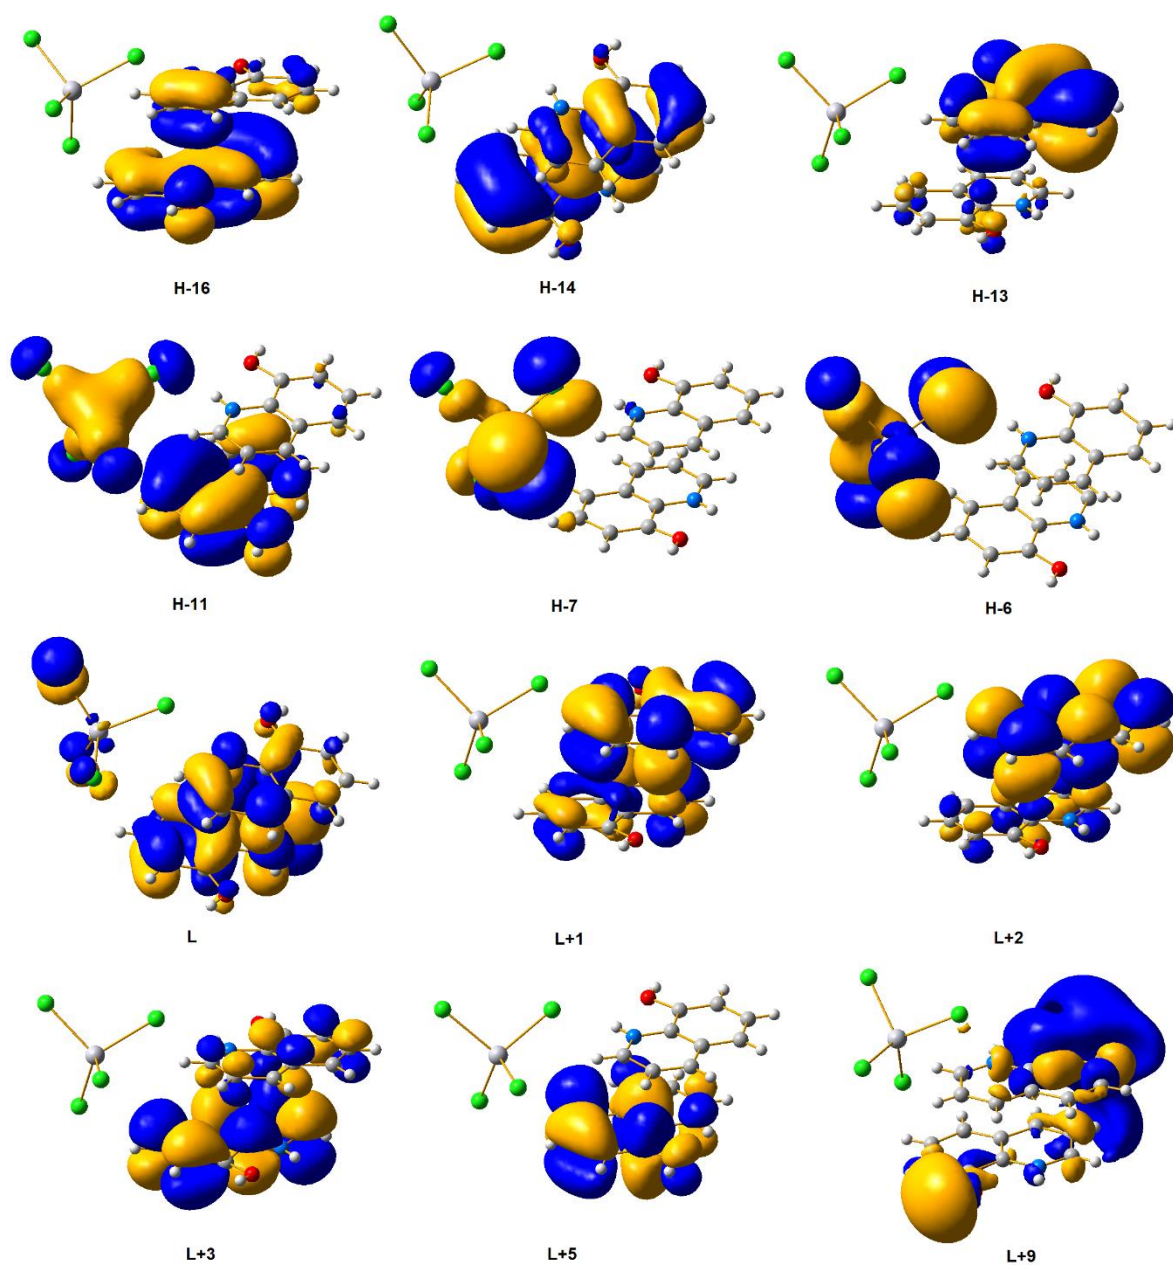

Figure S48. Molecular orbitals of the compound HgCl(1).

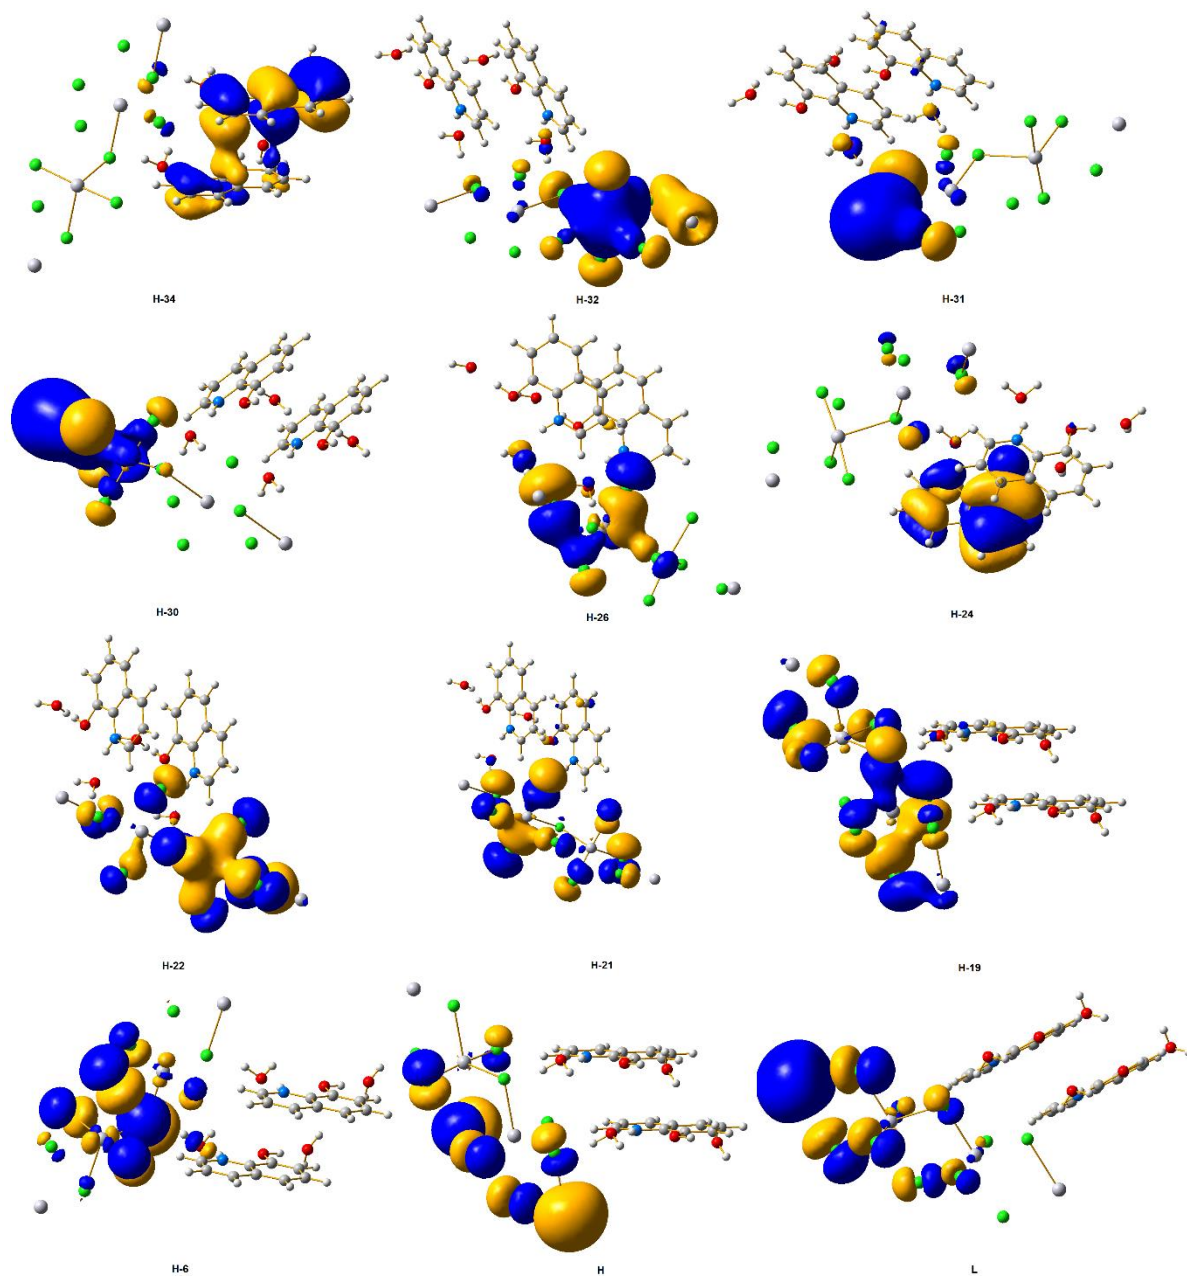

Figure S49. Molecular orbitals of the compound HgCl(2).

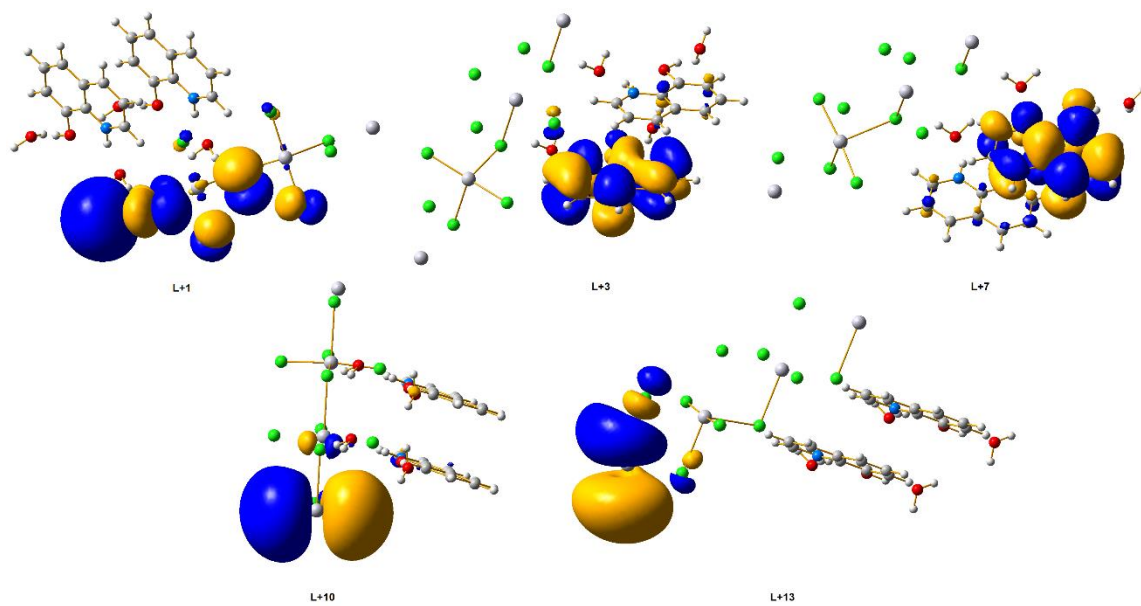

Figure S49. *continued*

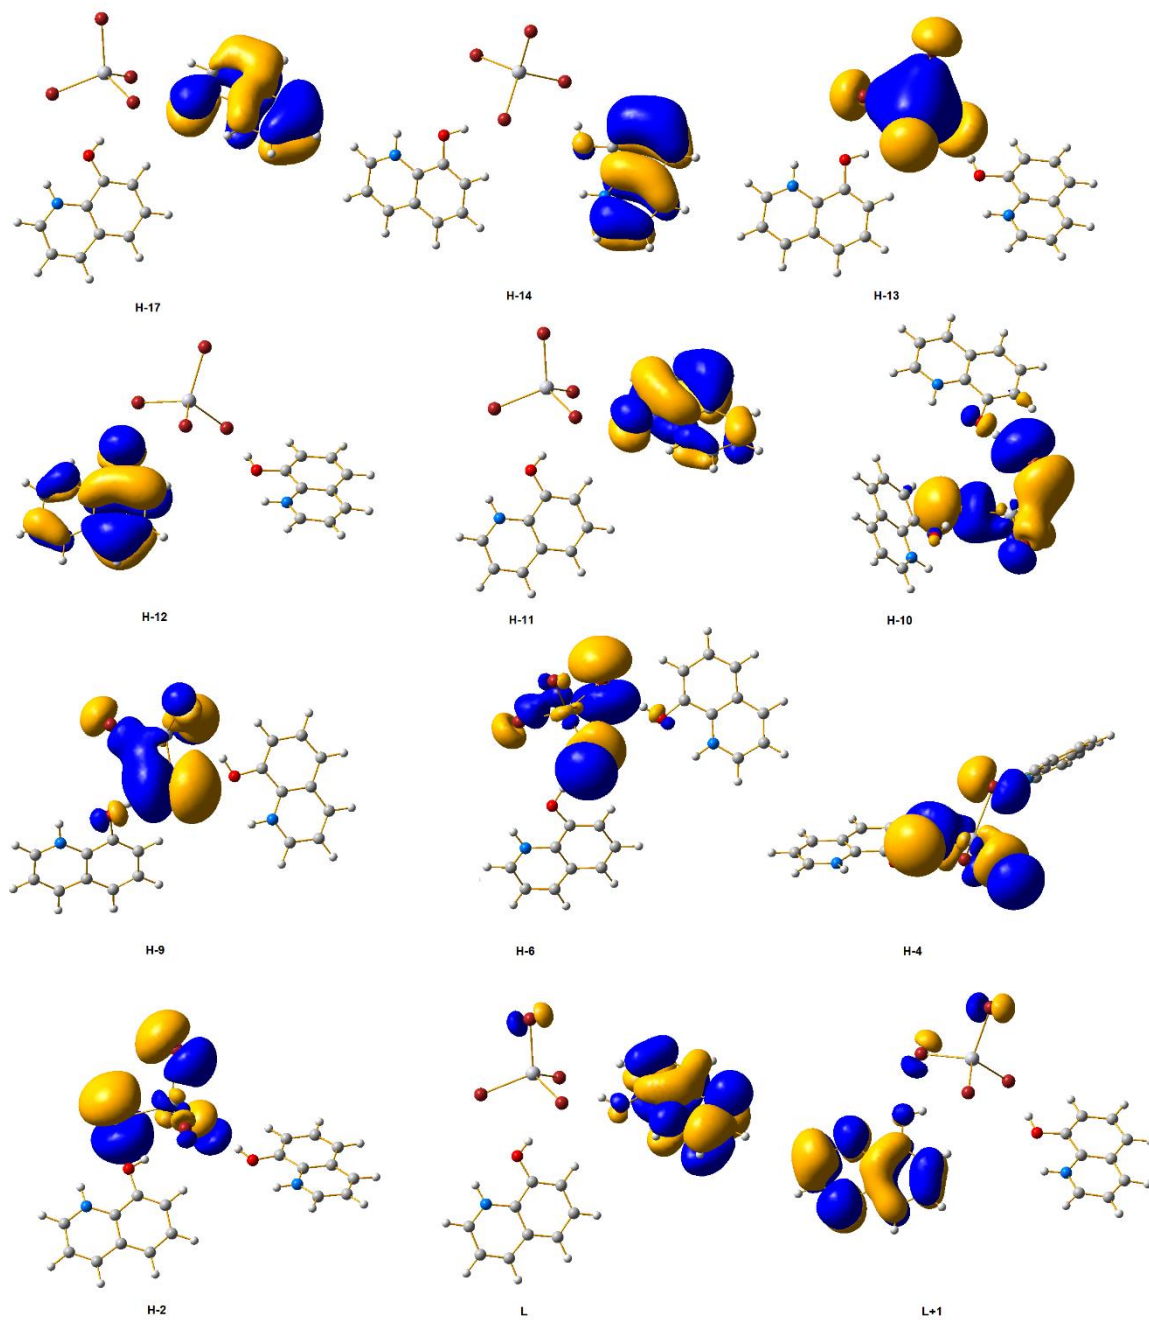

Figure S50. Molecular orbitals of the compound HgBr.

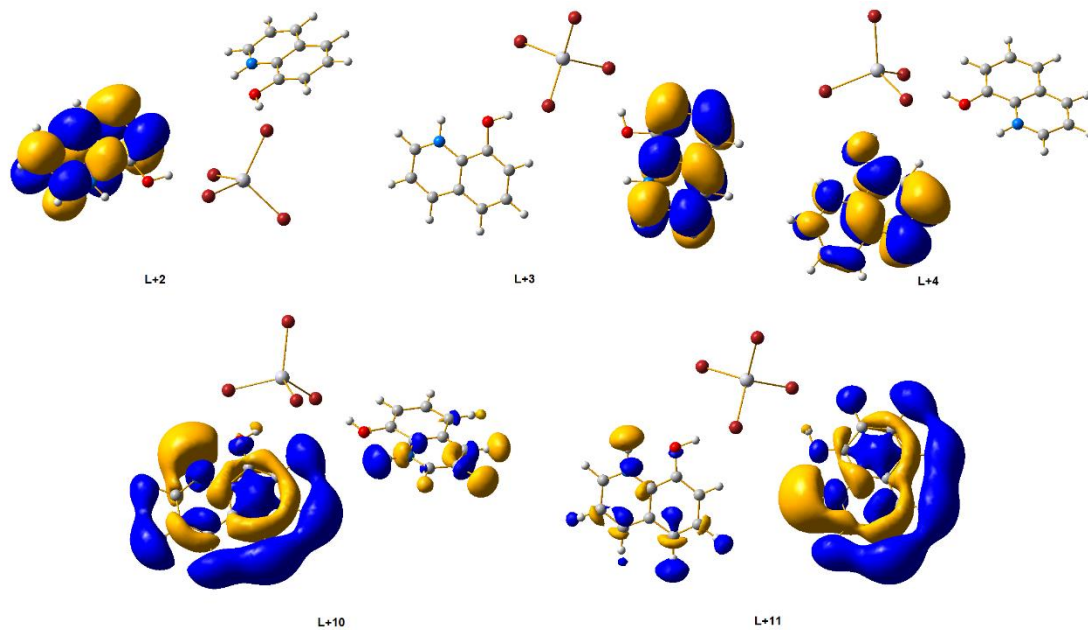

Figure S50. *continued*



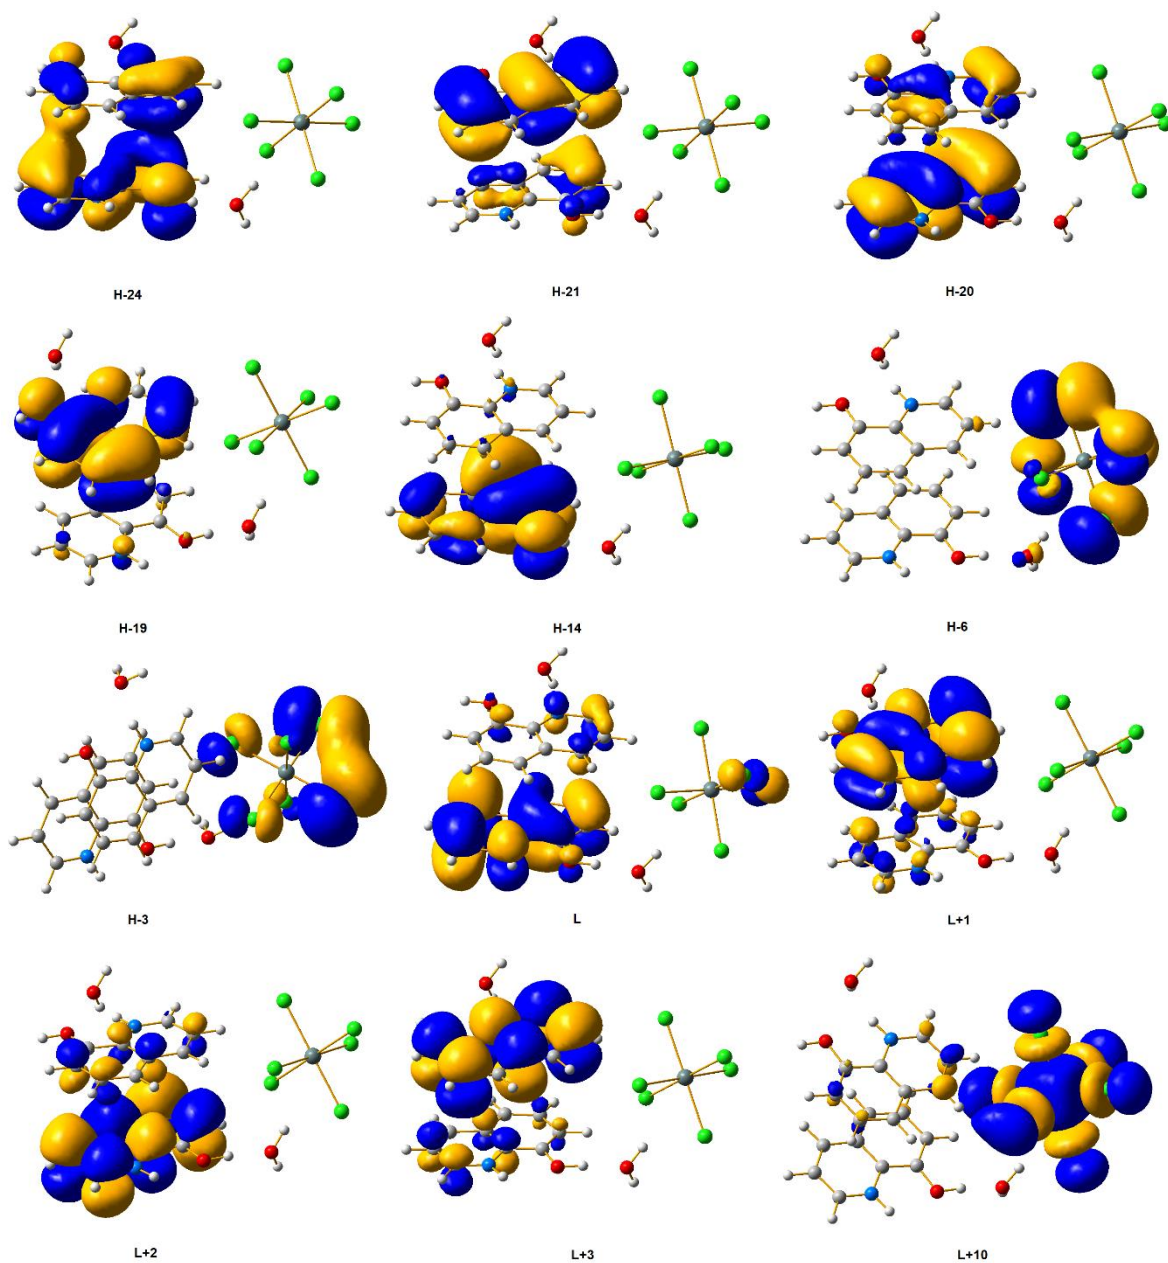

Figure S51. Molecular orbitals of the compound SnCl(1).

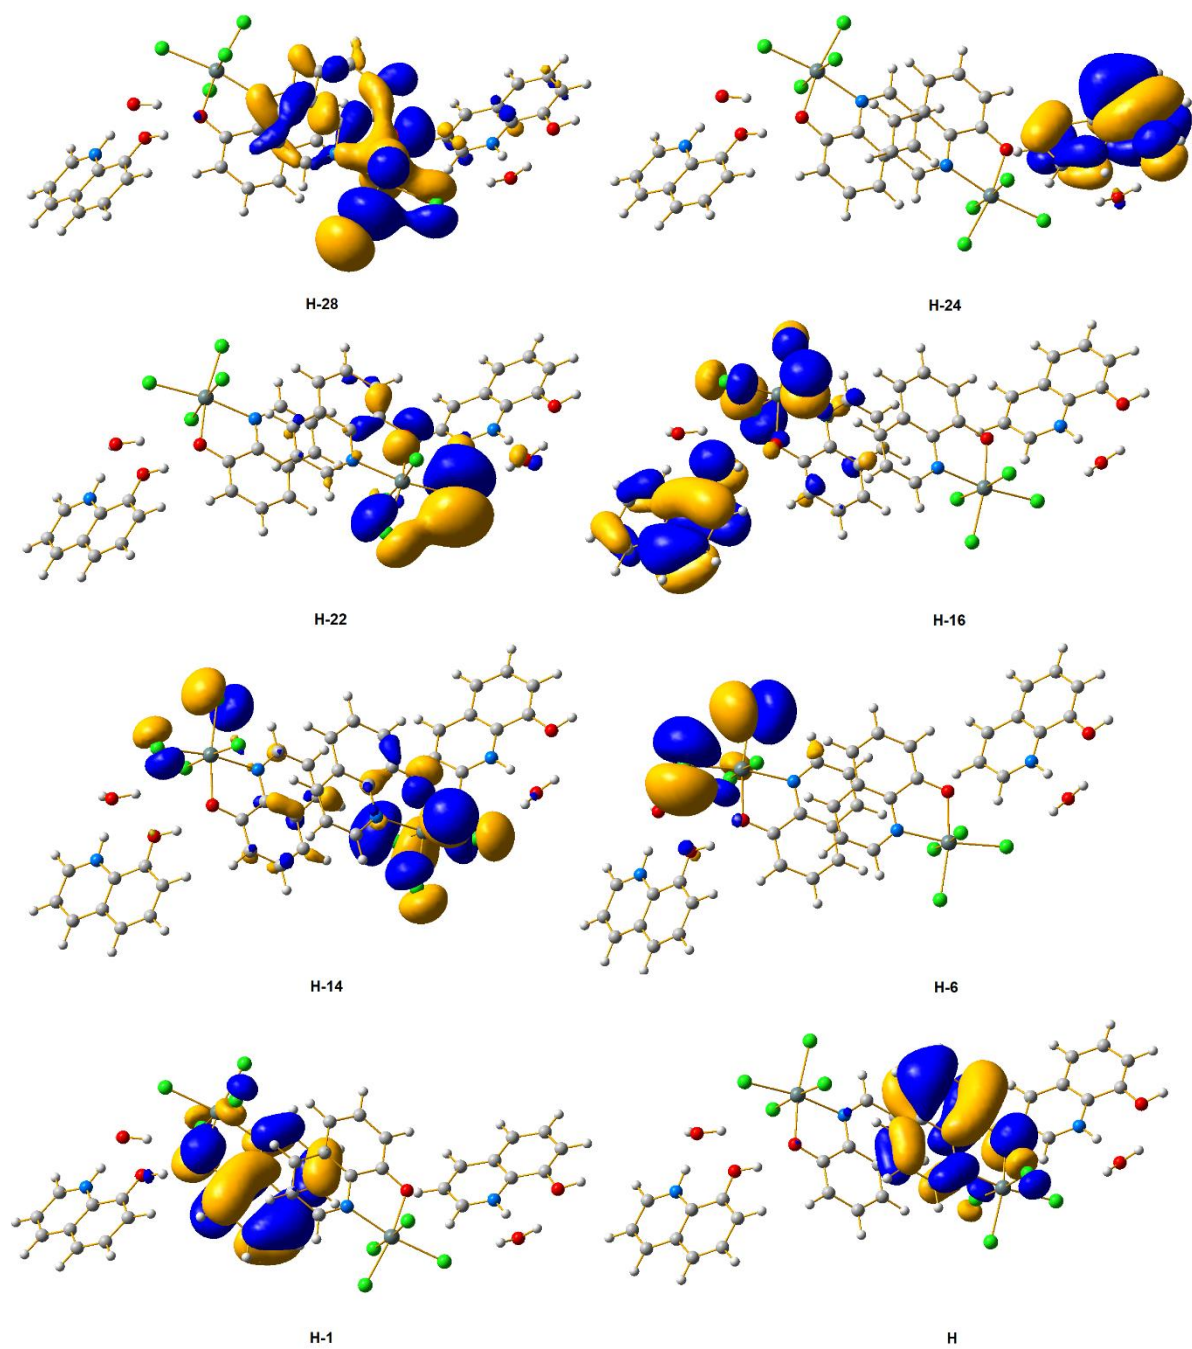

Figure S52. Molecular orbitals of the compound SnCl(2).

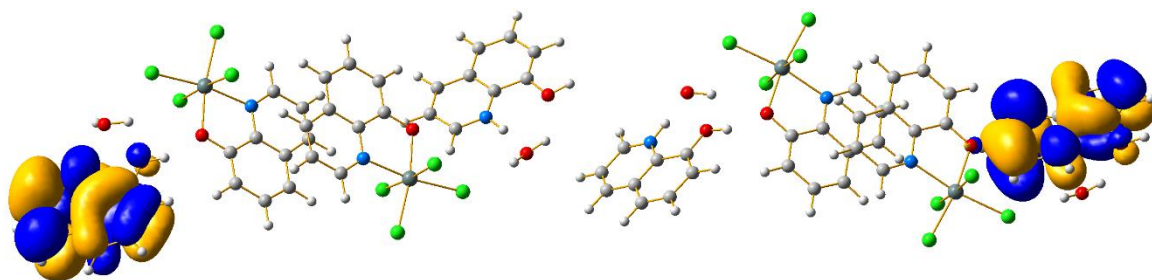

L

L+1

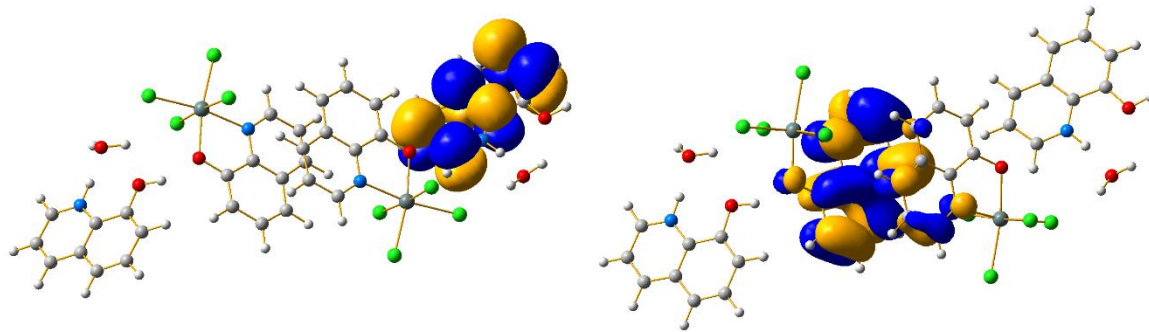

L+3

L+4

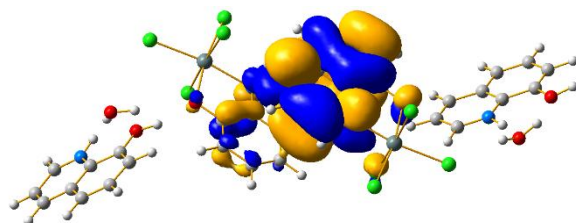

L+5

Figure S52. *continued*

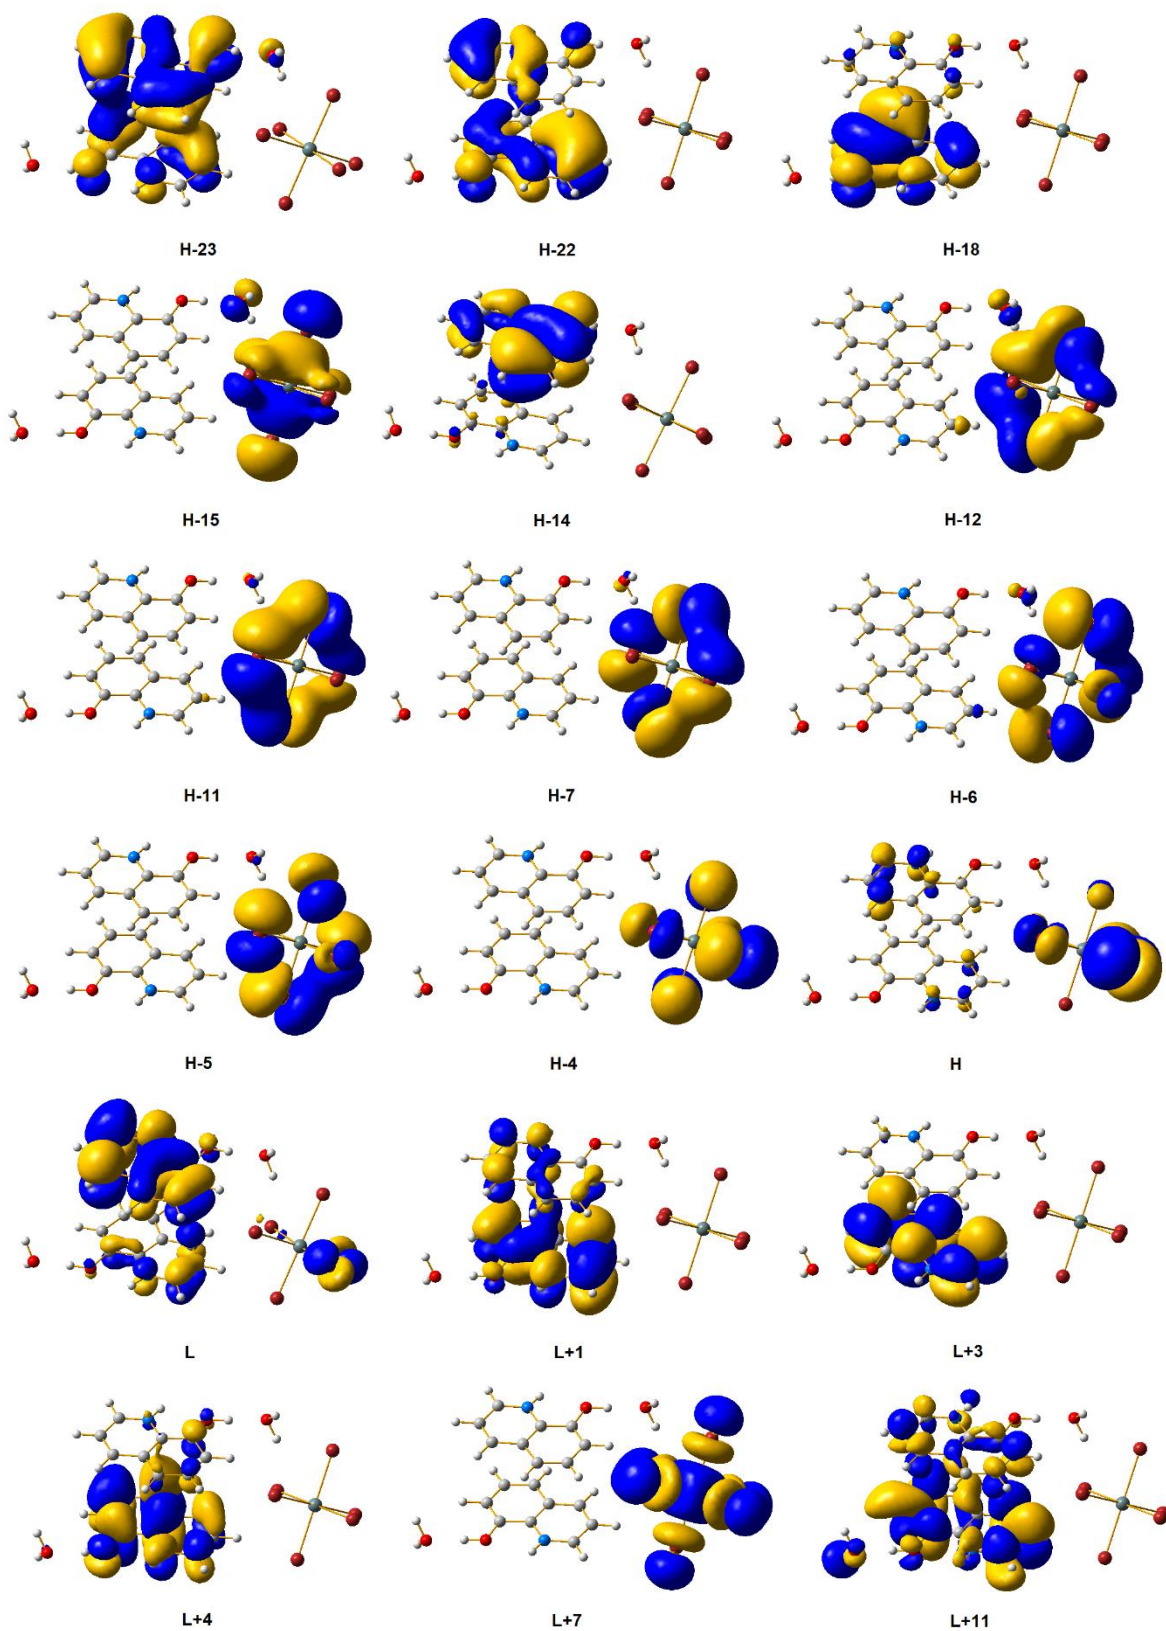

Figure S53. Molecular orbitals of the compound SnBr.



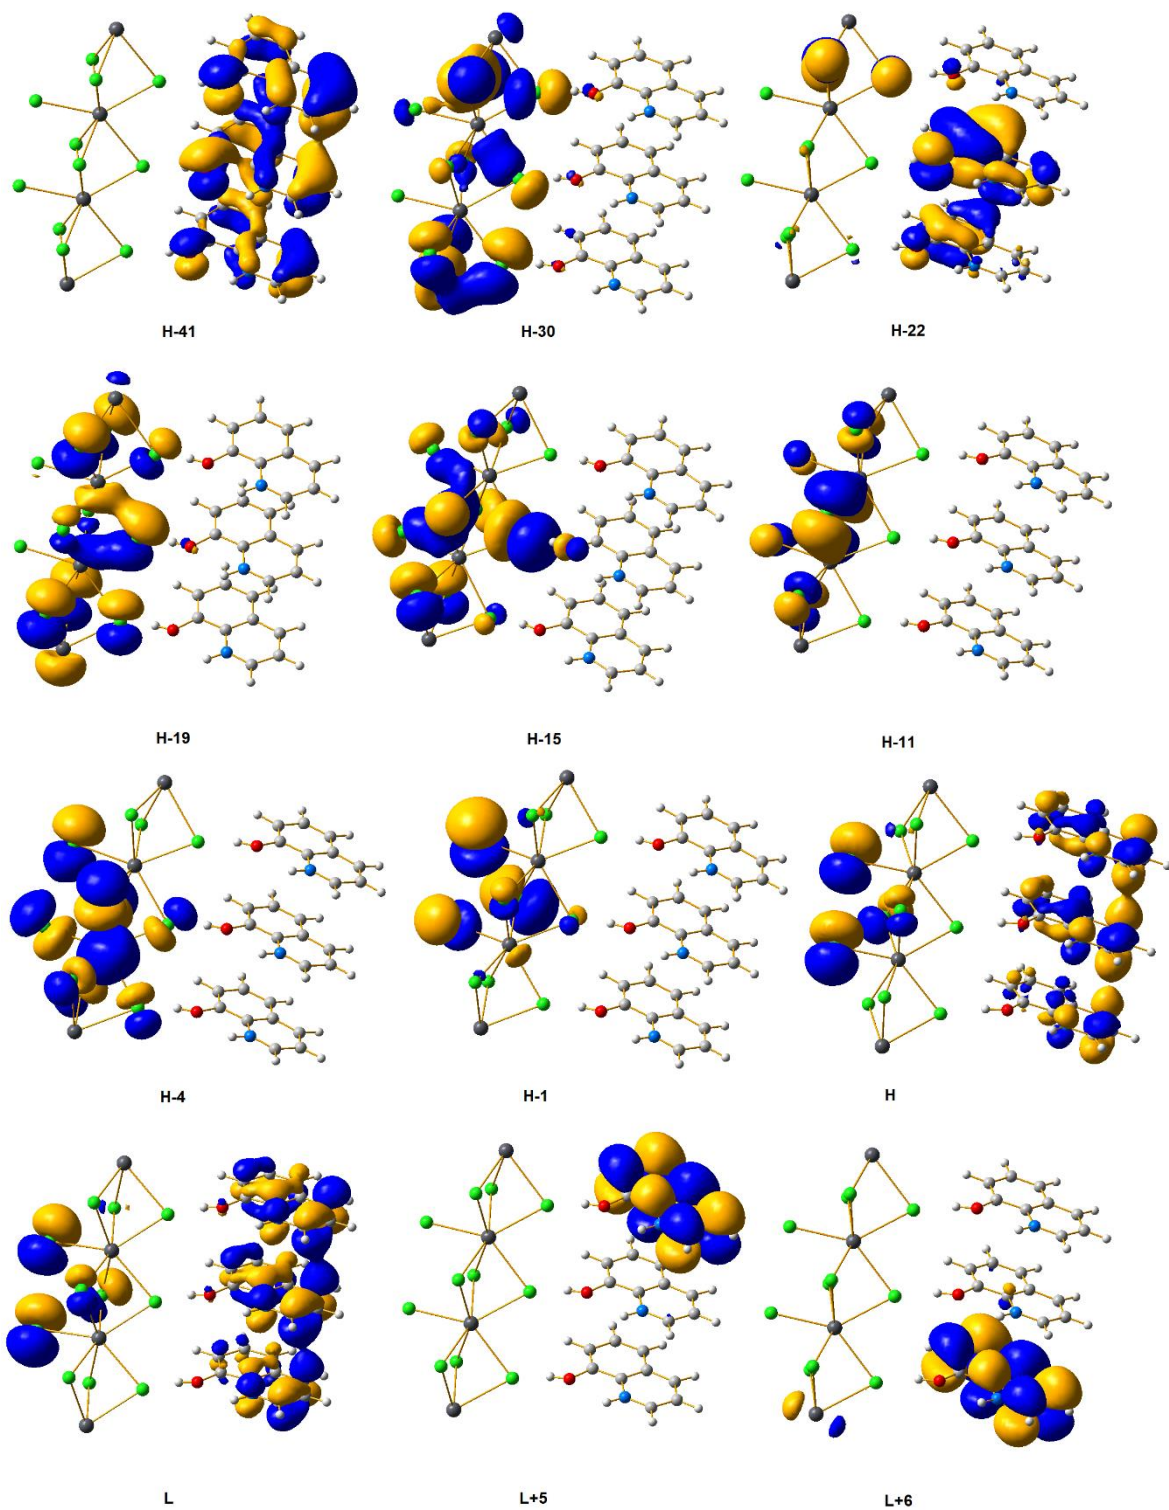

Figure S54. Molecular orbitals of the compound PbCl.

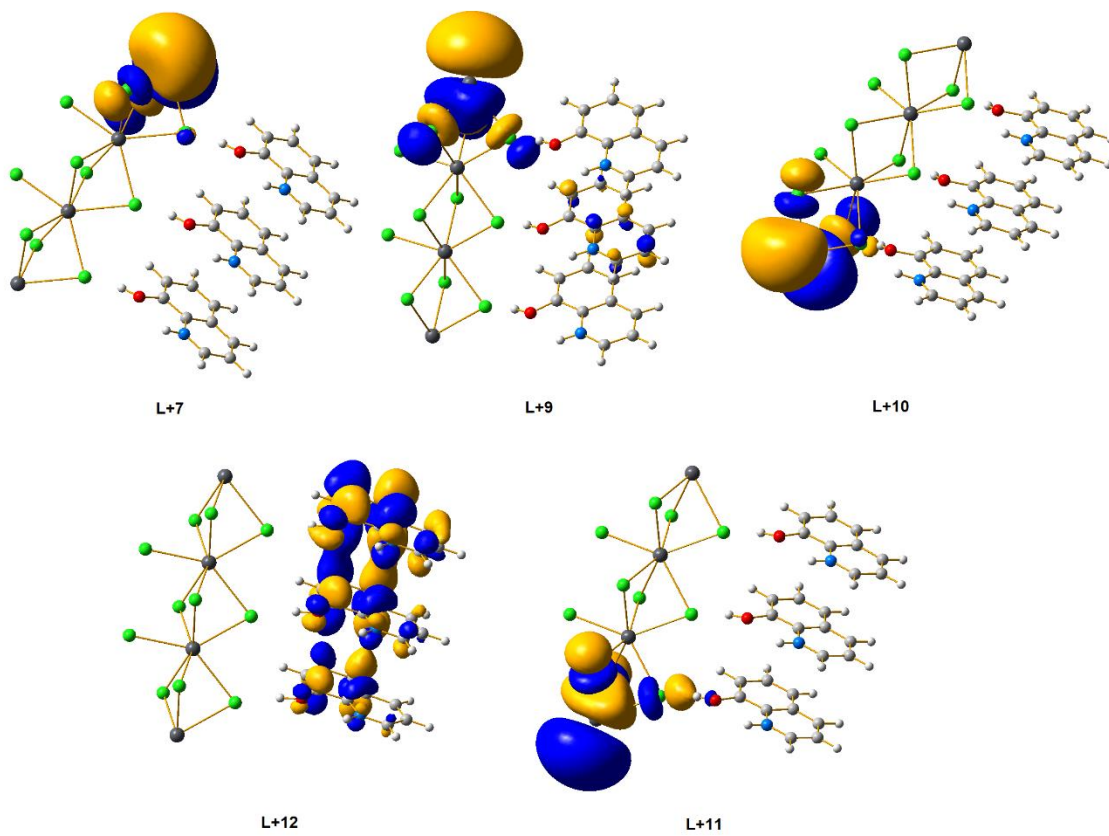

Figure S54. *continued*

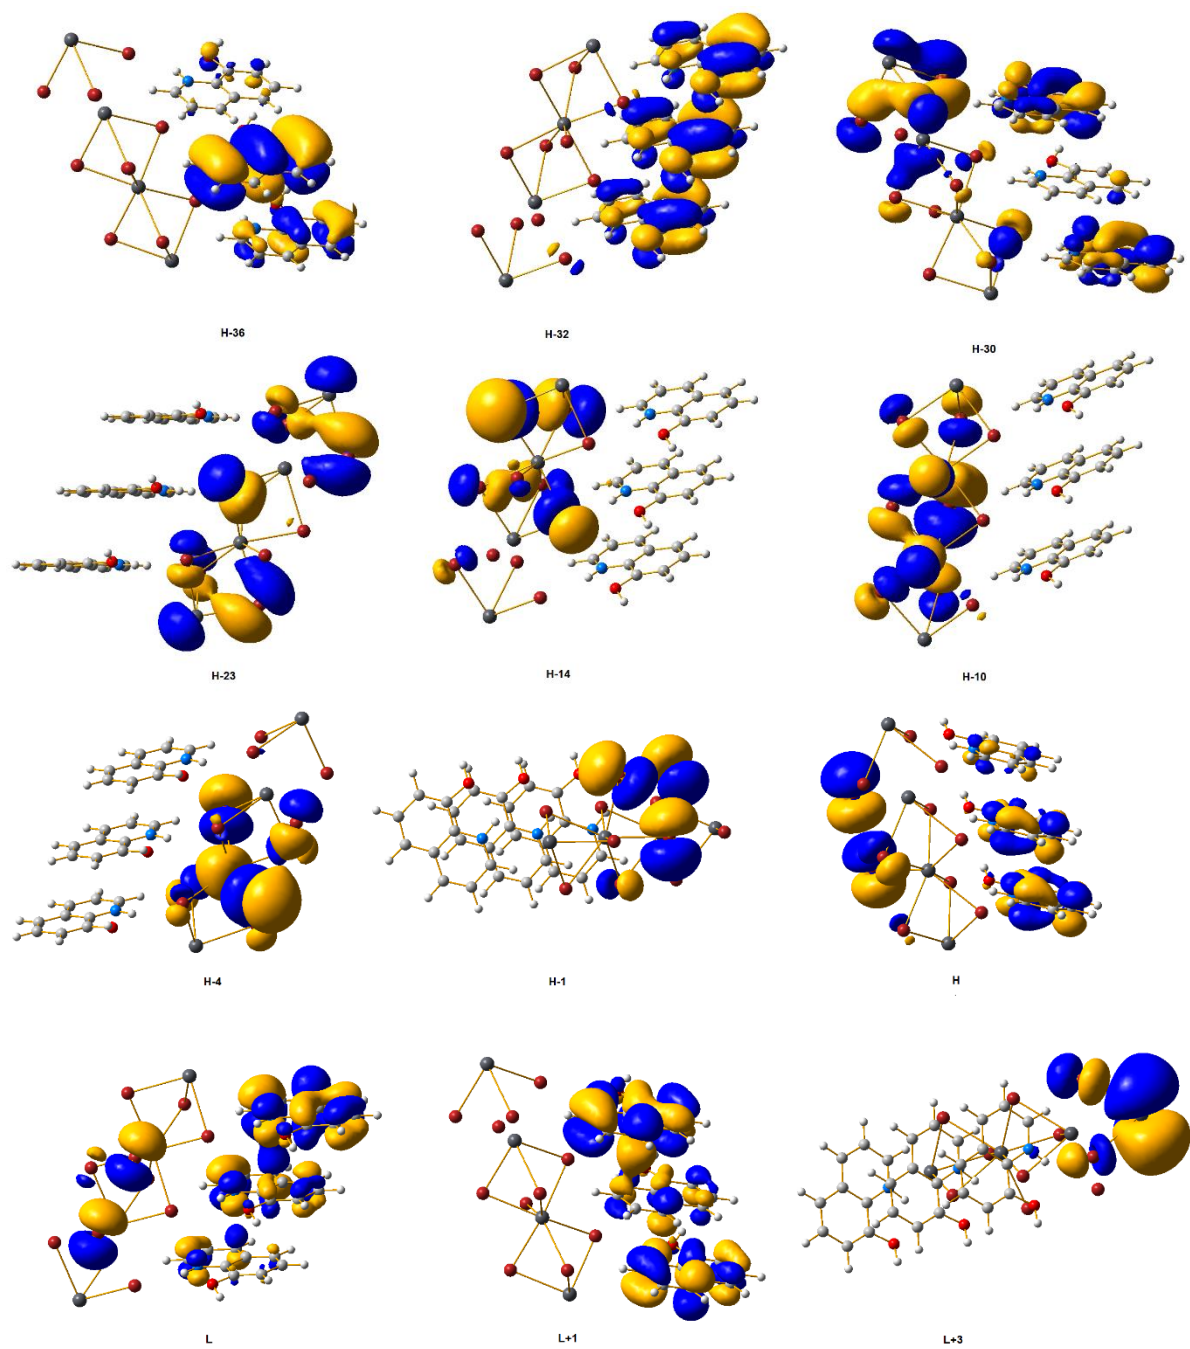

Figure S55. Molecular orbitals of the compound PbBr.

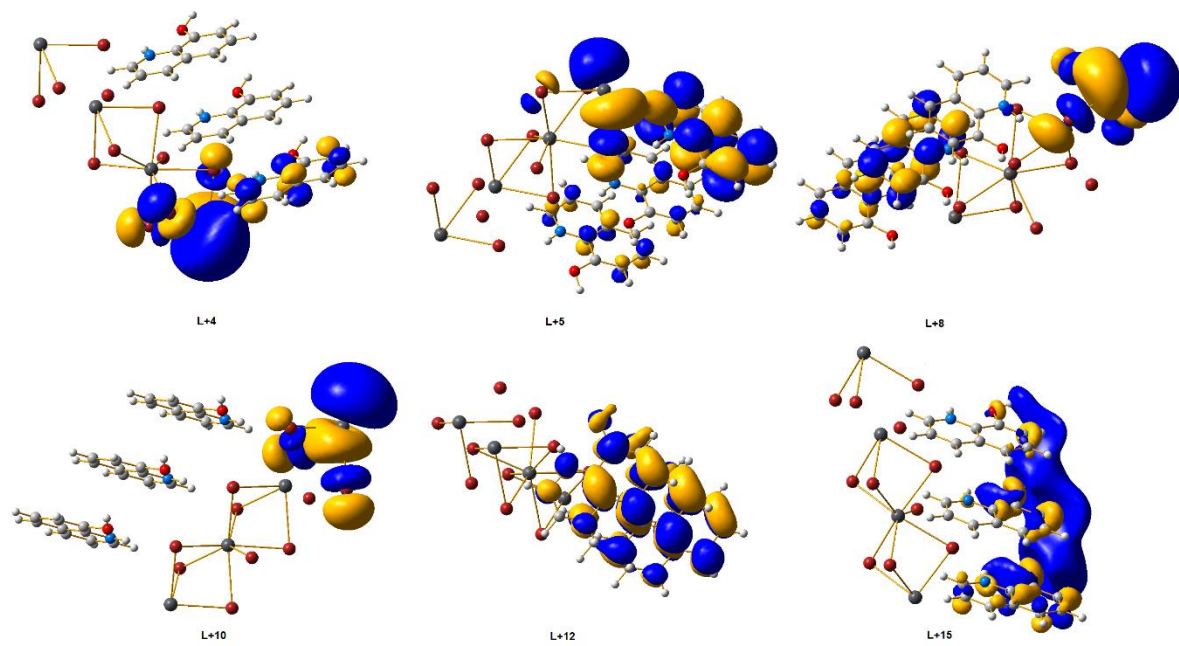

Figure S55. *continued*



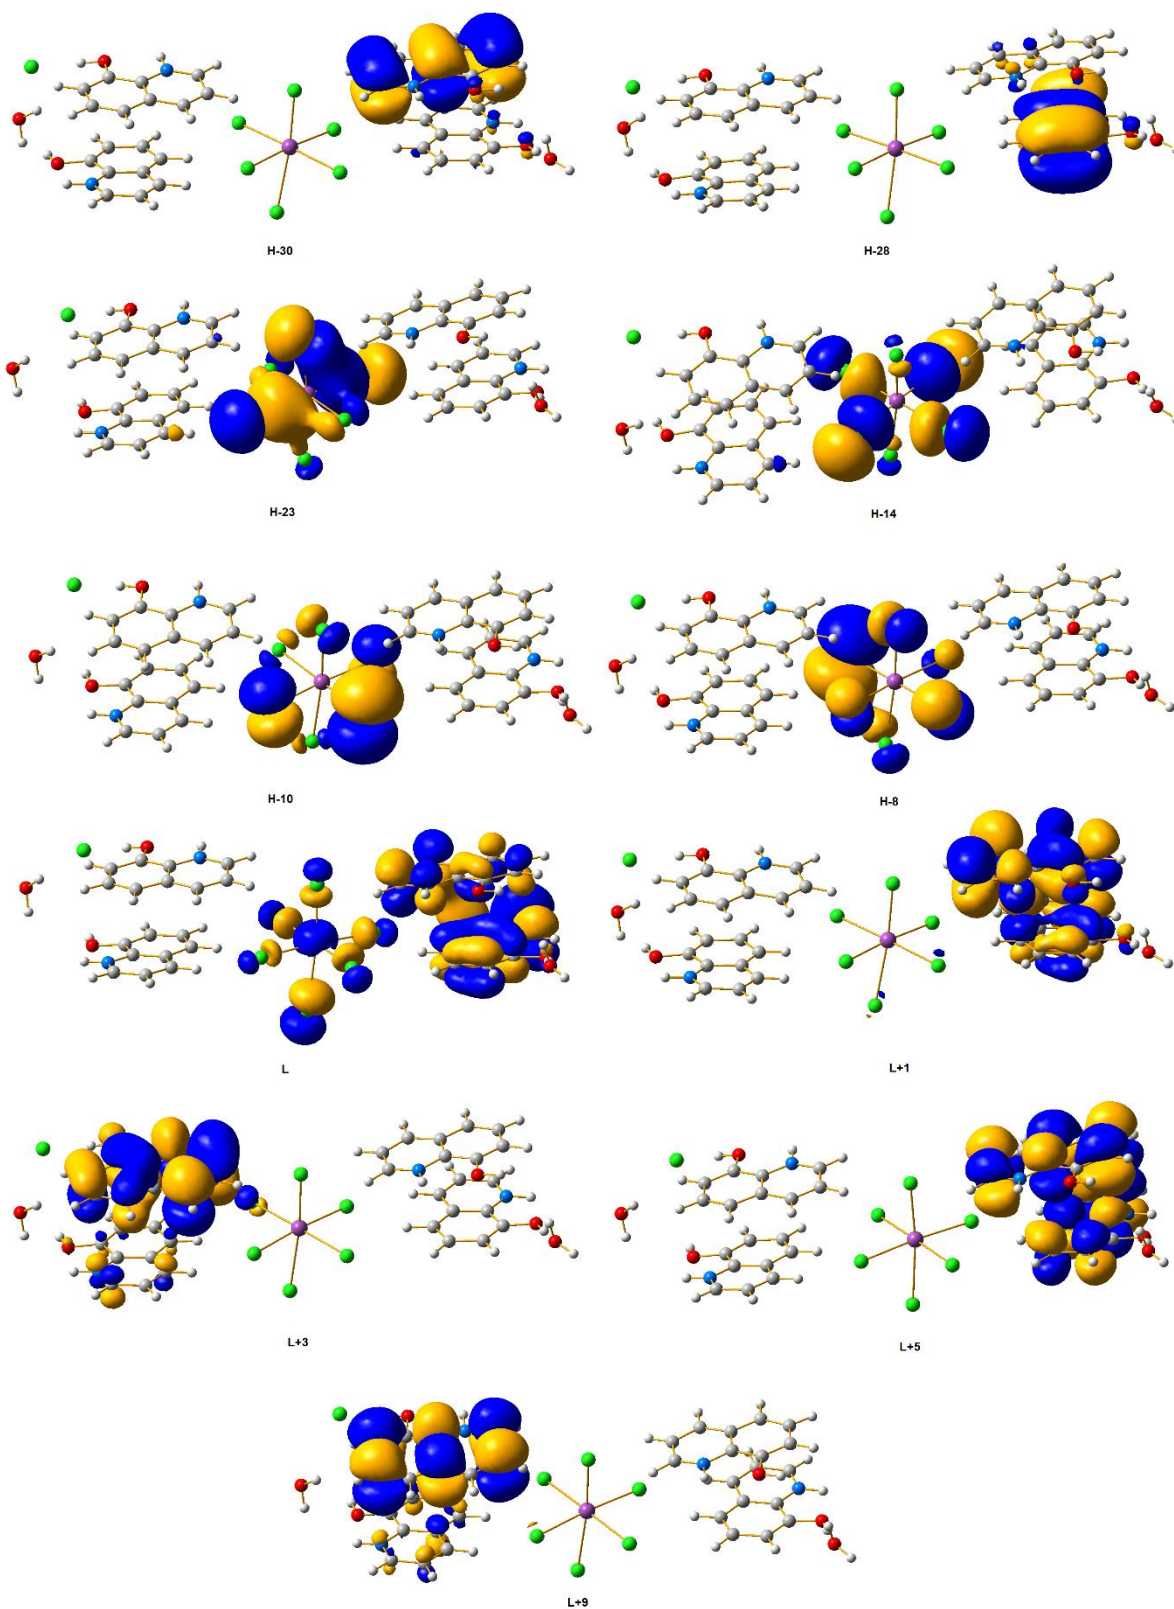

Figure S56. Molecular orbitals of the compound BiCl.

Calculated molecular orbitals involved in the excitation process, corresponding to Table 2 of the main manuscript (Figure S57-S75). H letter indicates HOMO, L - LUMO, and +/- (number) represents subsequent orbitals below HOMO and above LUMO, respectively

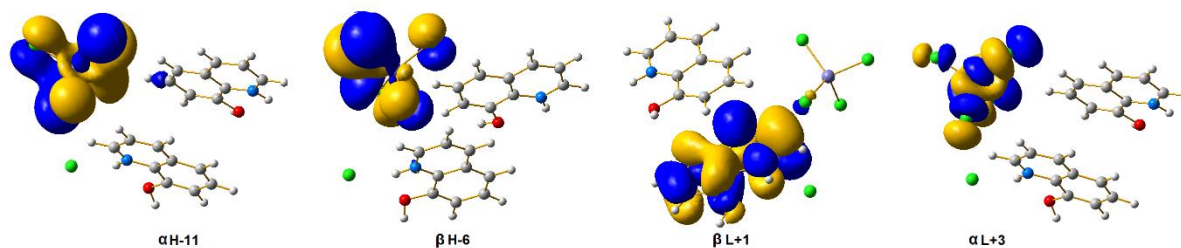

Figure S57. Molecular orbitals of FeCl

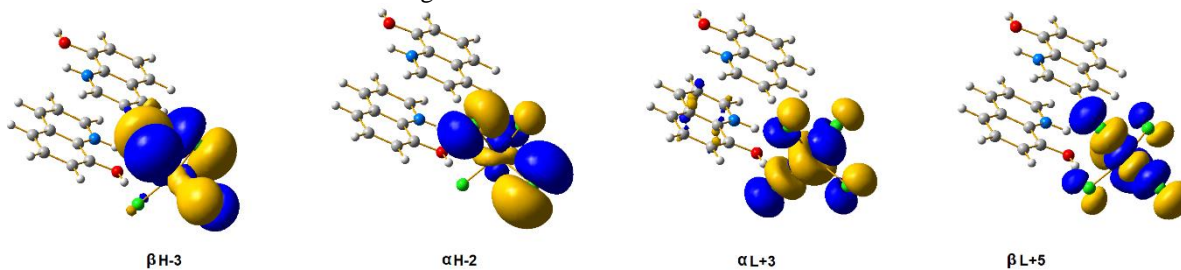

Figure S58. Molecular orbitals of CoCl

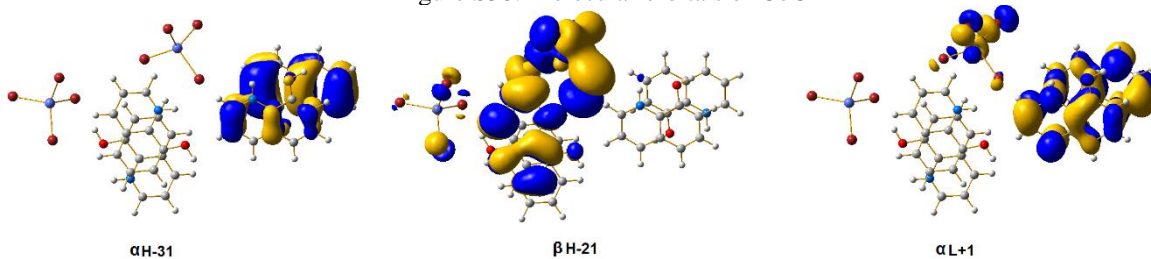

Figure S59. Molecular orbitals of CoBr

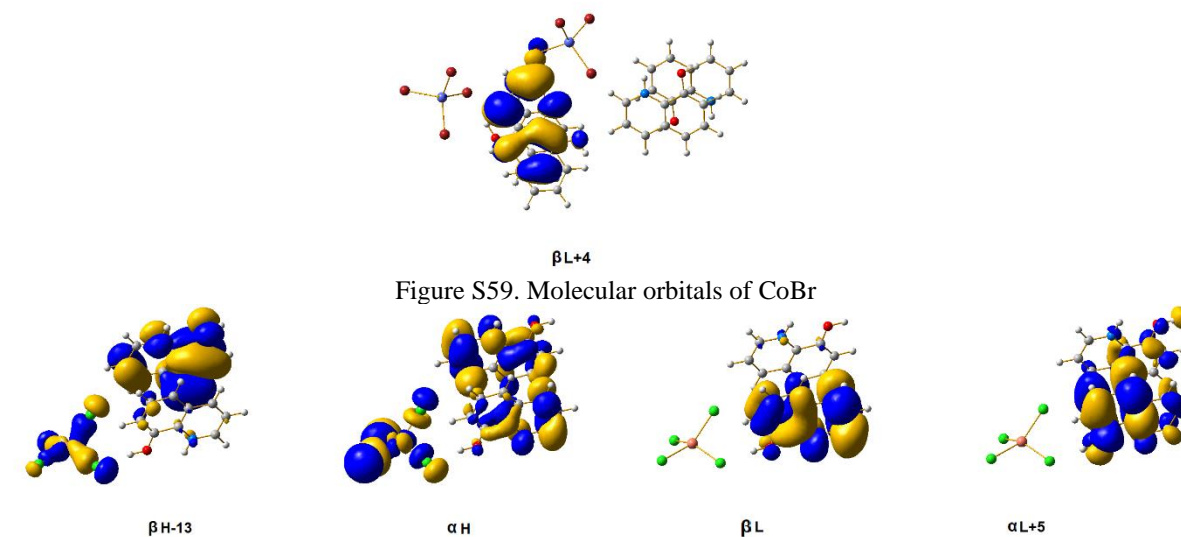

Figure S60. Molecular orbitals of CuCl

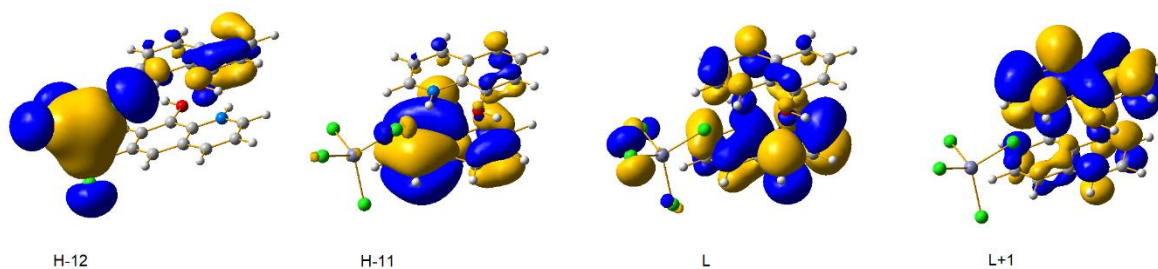

Figure S61. Molecular orbitals of ZnCl

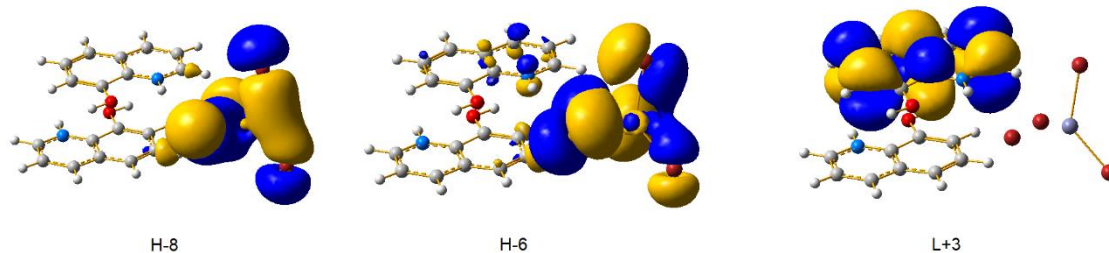

Figure S62. Molecular orbitals of ZnBr

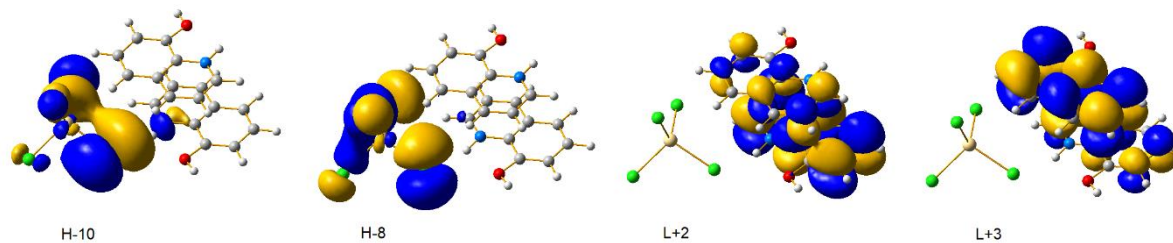

Figure S63. Molecular orbitals of CdCl

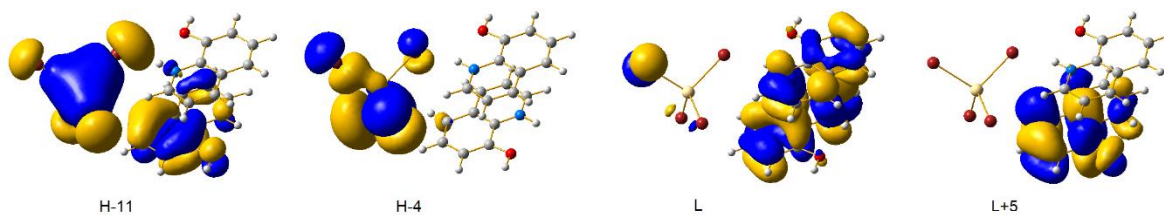

Figure S64. Molecular orbitals of CdBr

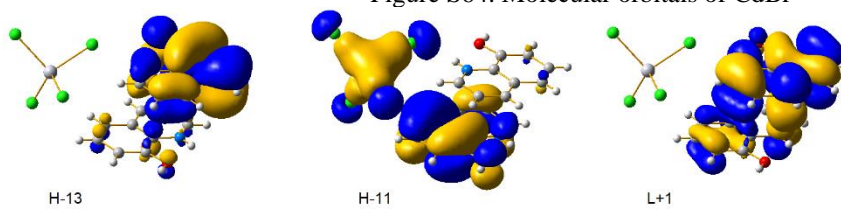

Figure S65. Molecular orbitals of HgCl(1)

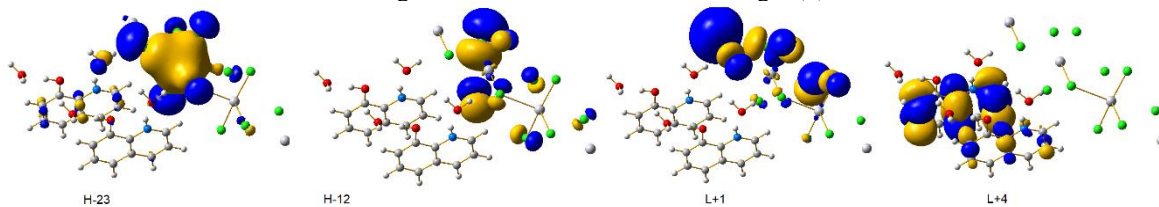

Figure S66. Molecular orbitals of HgCl(2)



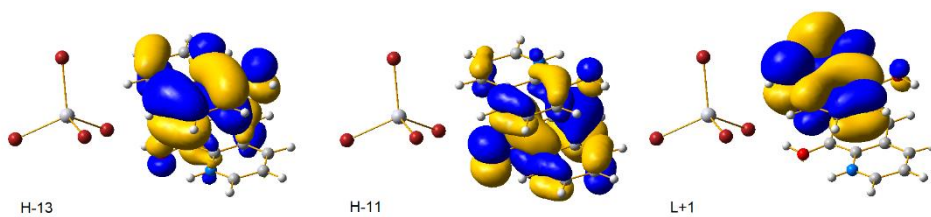

Figure S67. Molecular orbitals of HgBr

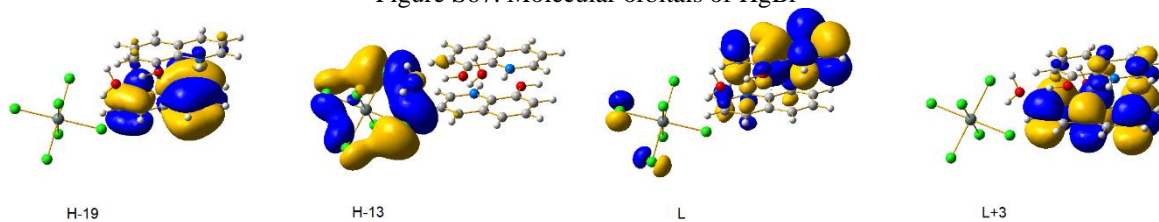

Figure S68. Molecular orbitals of SnCl(1)

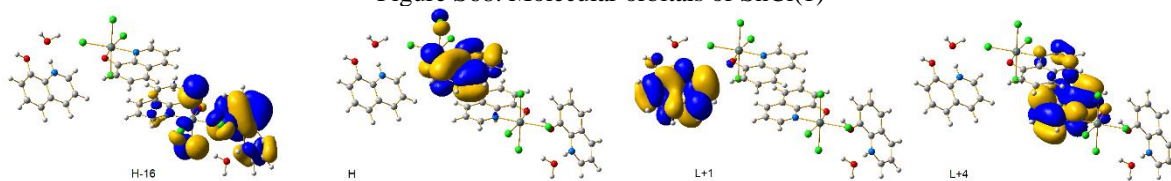

Figure S69. Molecular orbitals of SnCl(2)

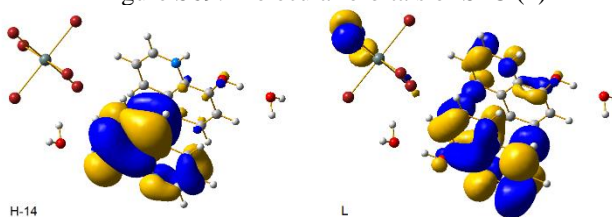

Figure S70. Molecular orbitals of SnBr

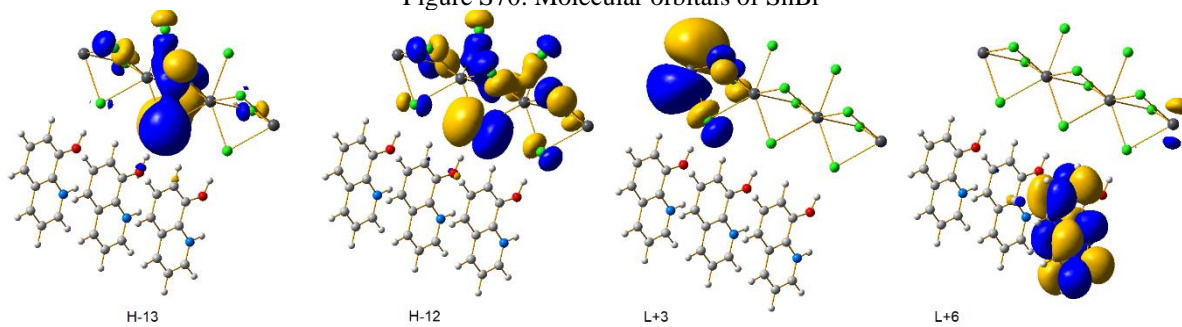

Figure S71. Molecular orbitals of PbCl

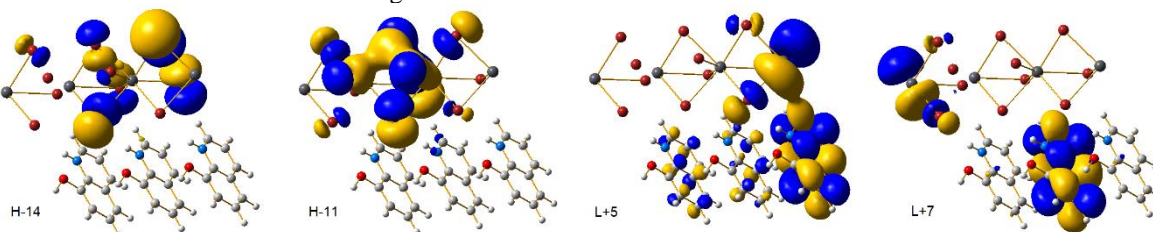

Figure S72. Molecular orbitals of PbBr

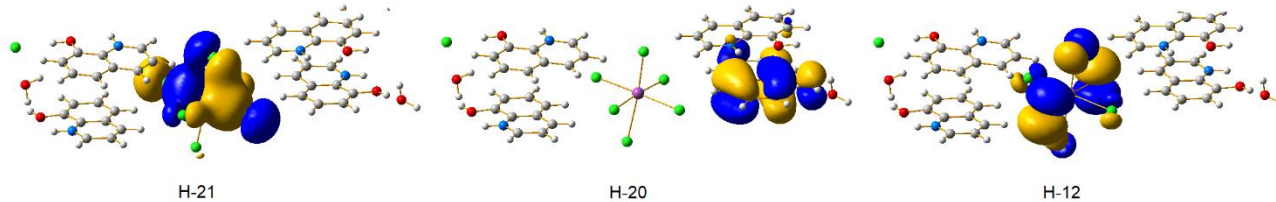

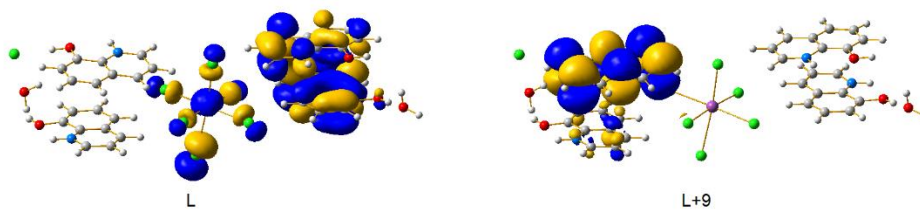

Figure S73. Molecular orbitals of BiCl

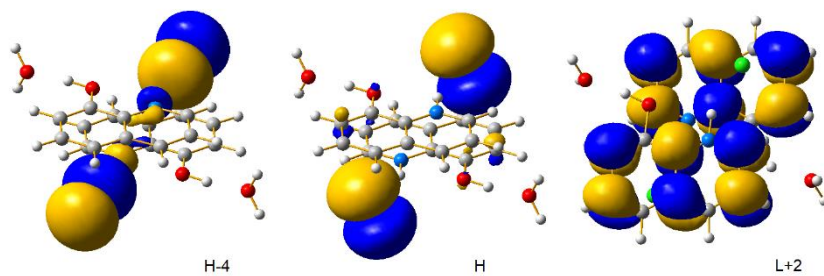

Figure S74. Molecular orbitals of 8hqHCl

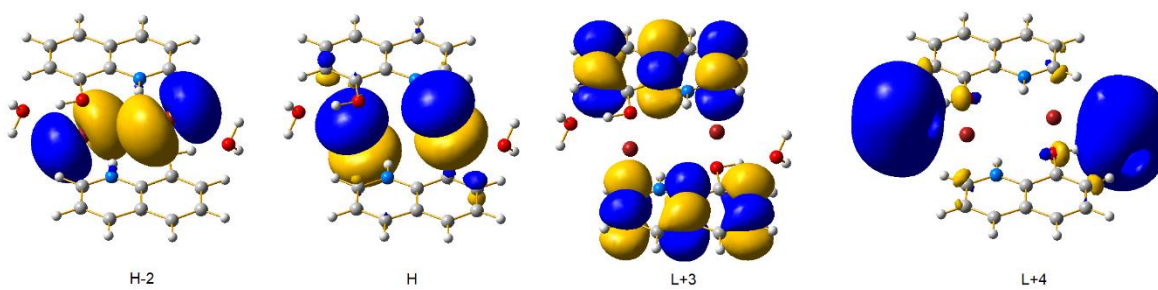

Figure S75. Molecular orbitals of 8hqHBr

3D-EEM fluorescence spectra (Figure S76-S95)

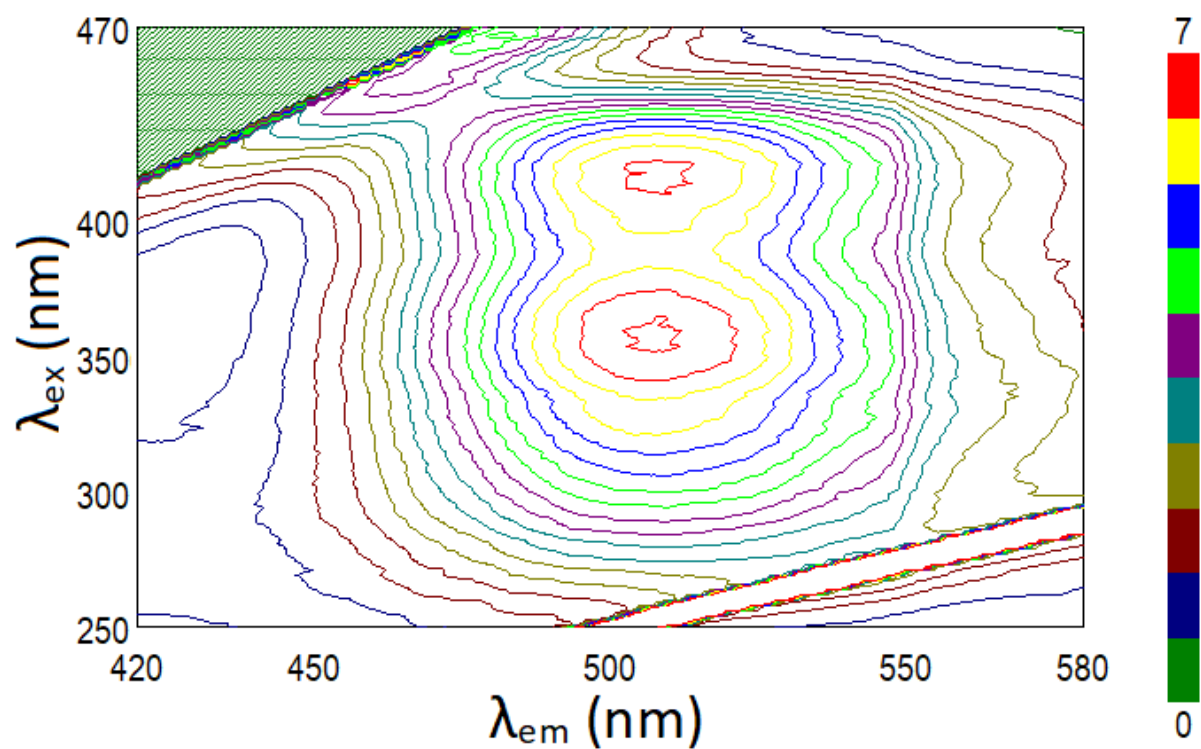

Figure S76. 3D-EEM fluorescence spectrum of FeCl

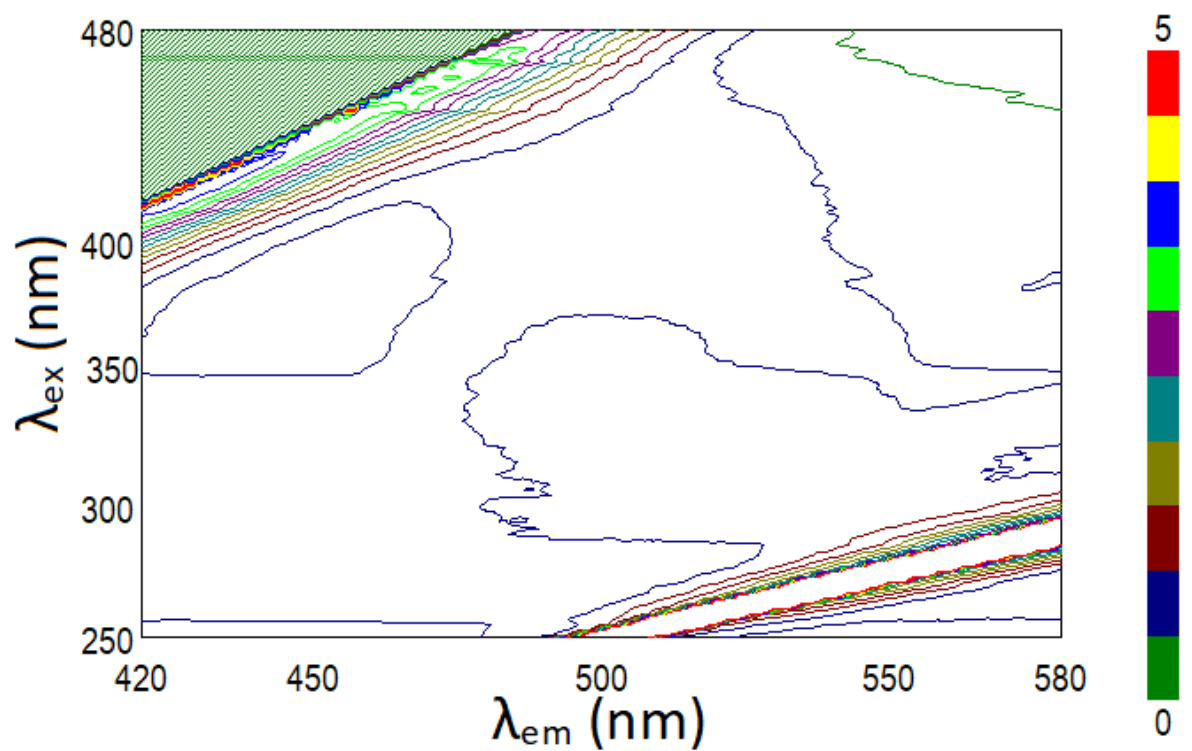

Figure S77. 3D-EEM fluorescence spectrum of FeBr

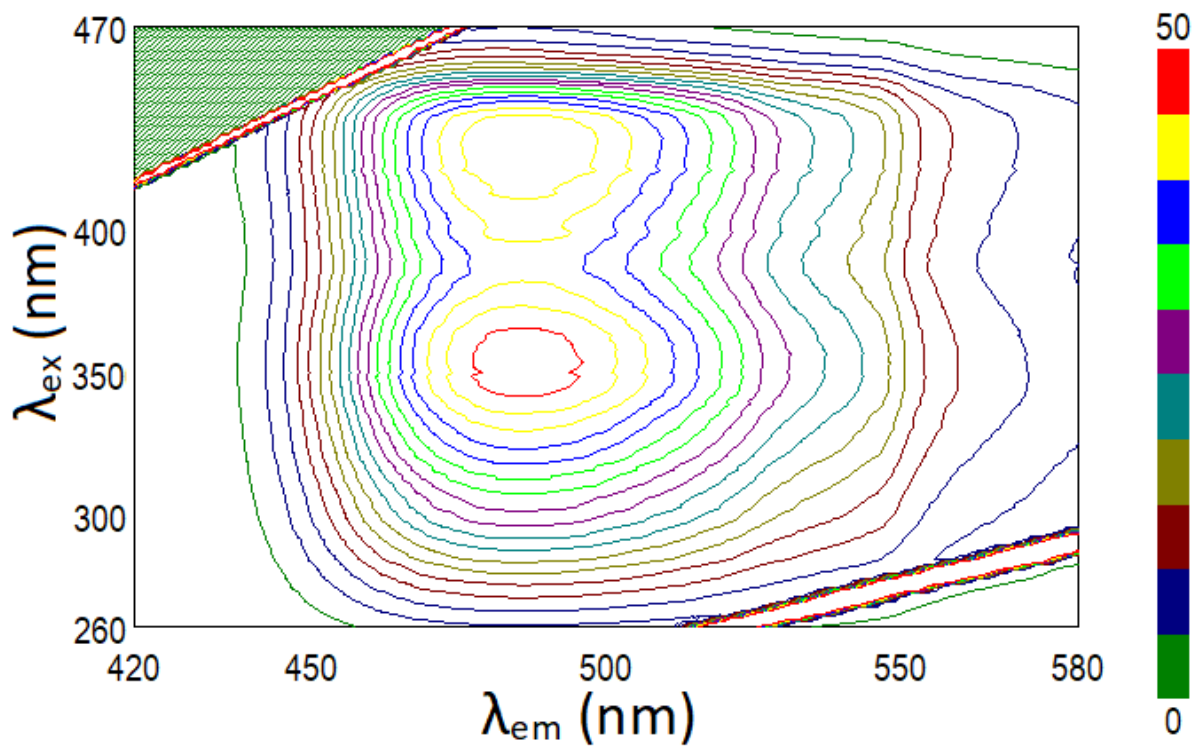

Figure S78. 3D-EEM fluorescence spectrum of CoCl

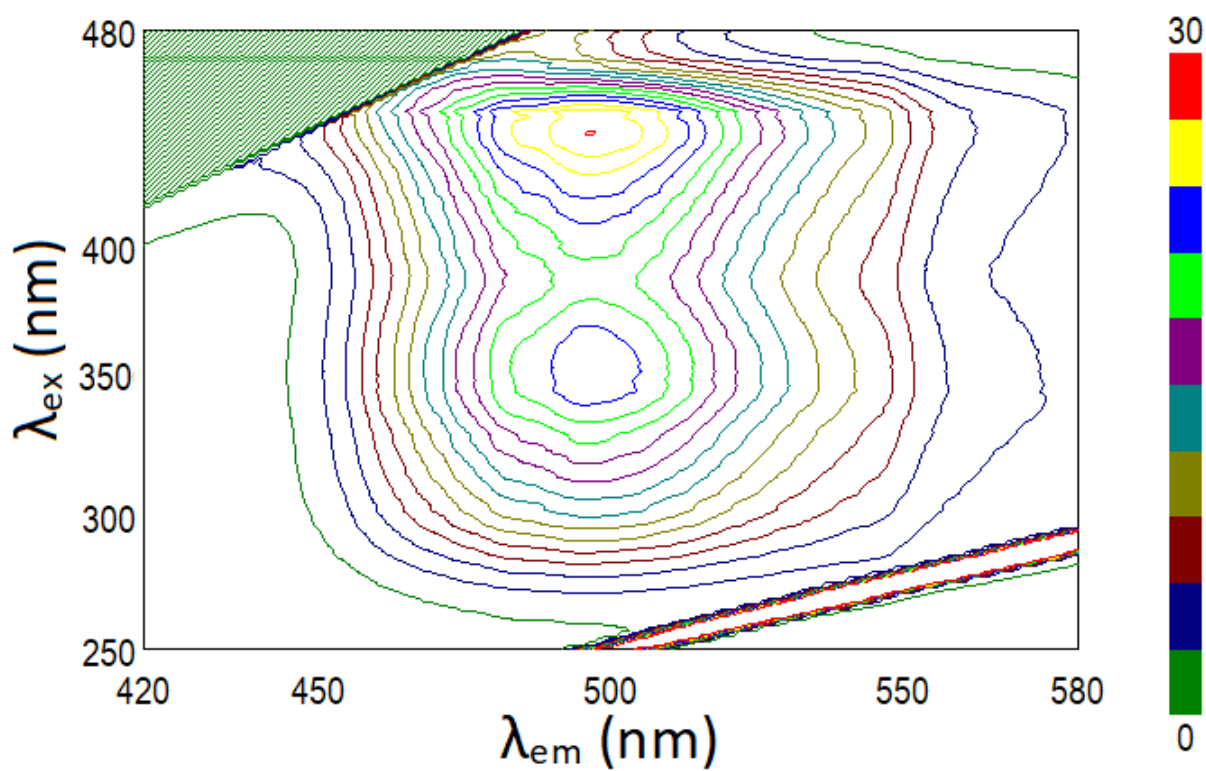

Figure S79. 3D-EEM fluorescence spectrum of CoBr



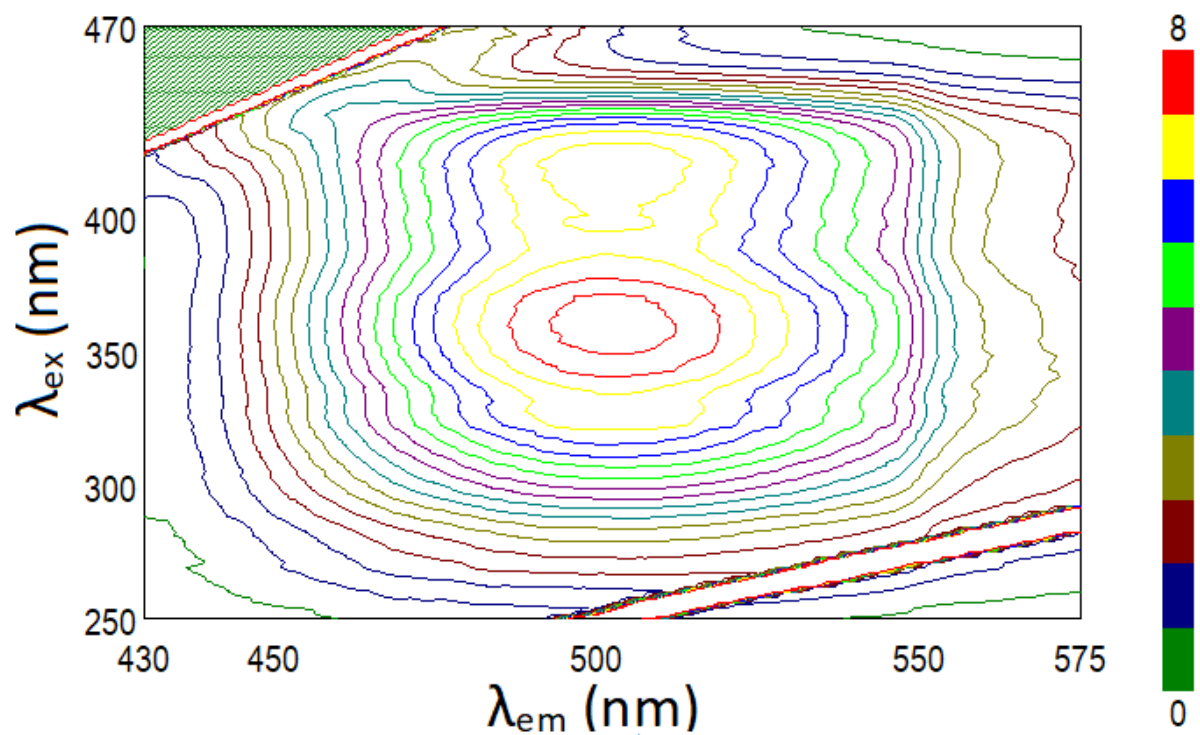

Figure S80. 3D-EEM fluorescence spectrum of CuCl

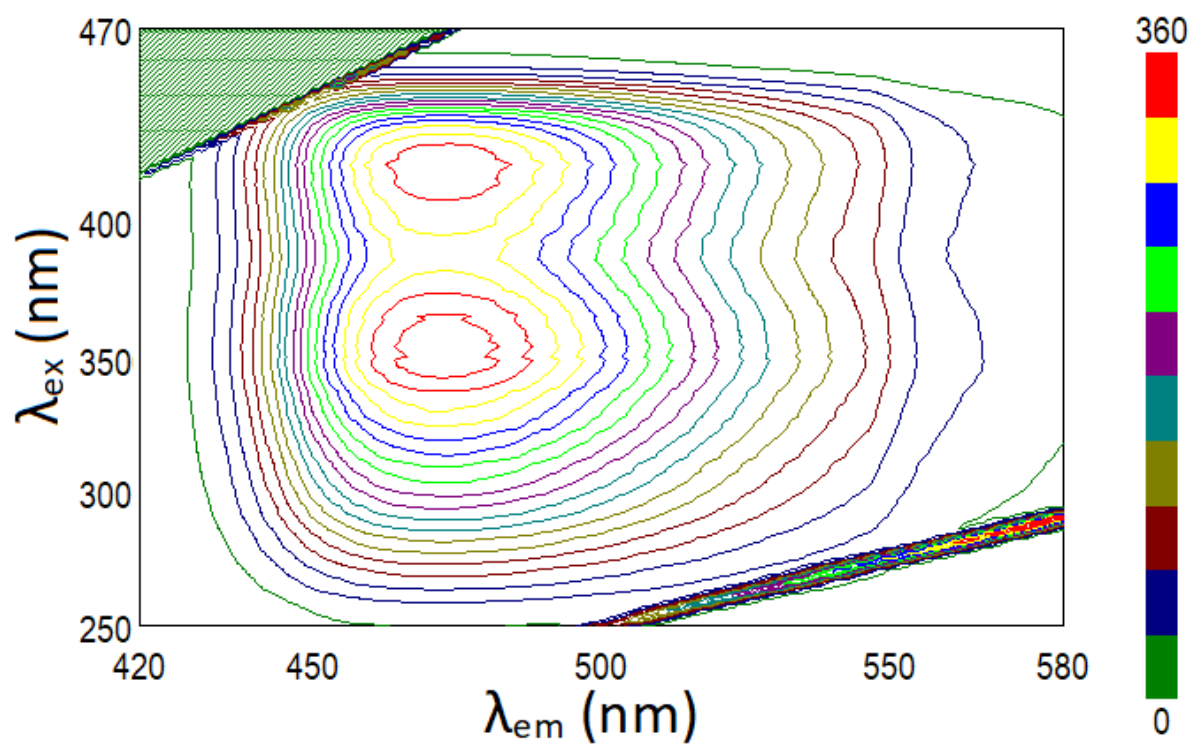

Figure S81. 3D-EEM fluorescence spectrum of ZnCl



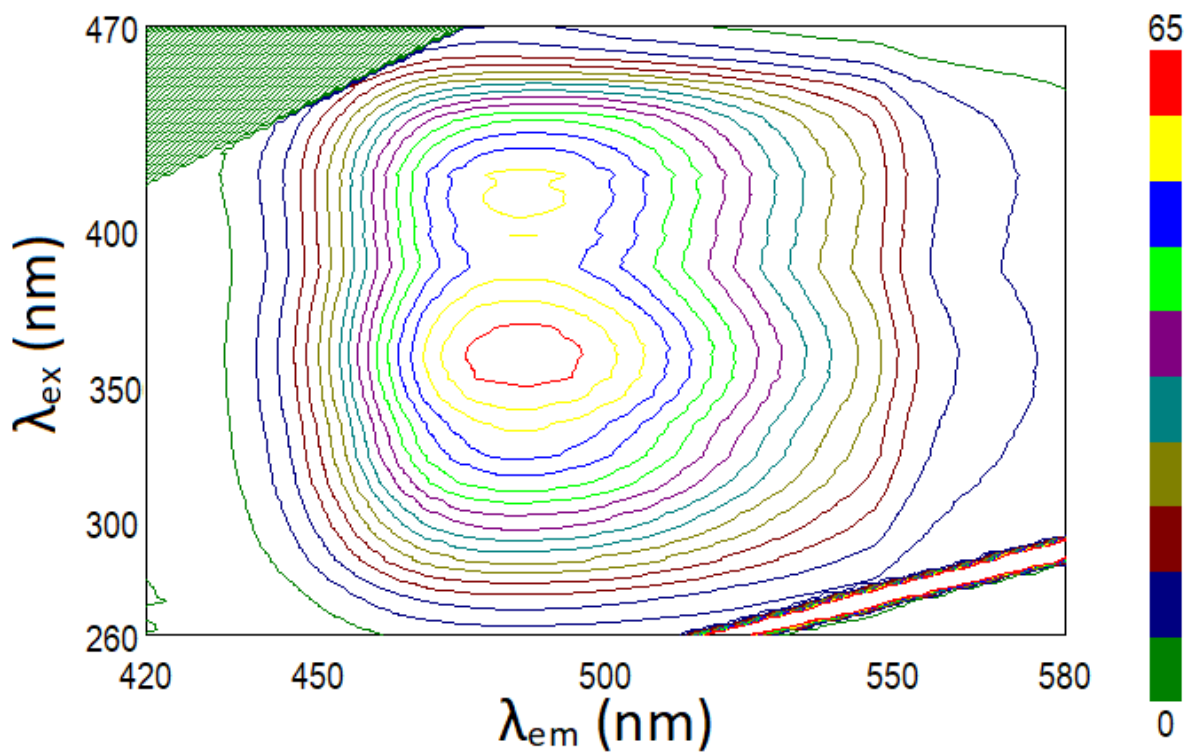

Figure S82. 3D-EEM fluorescence spectrum of ZnBr

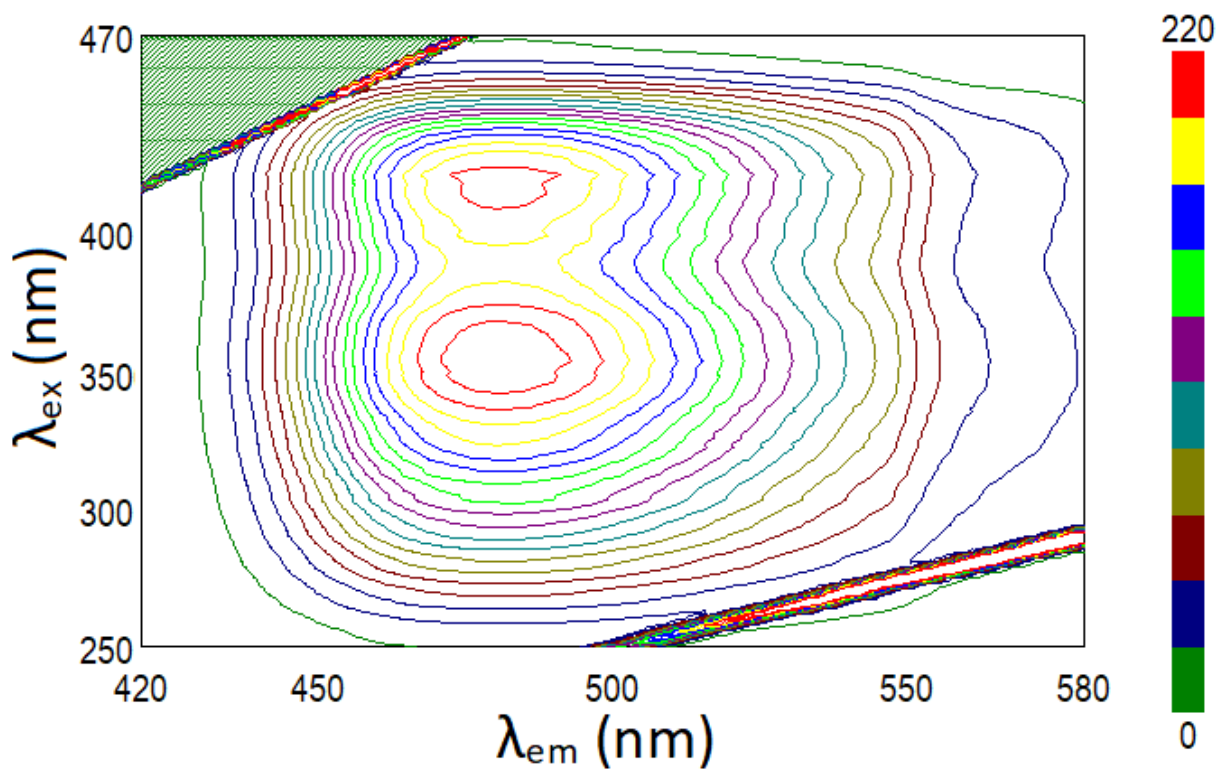

Figure S83. 3D-EEM fluorescence spectrum of CdCl

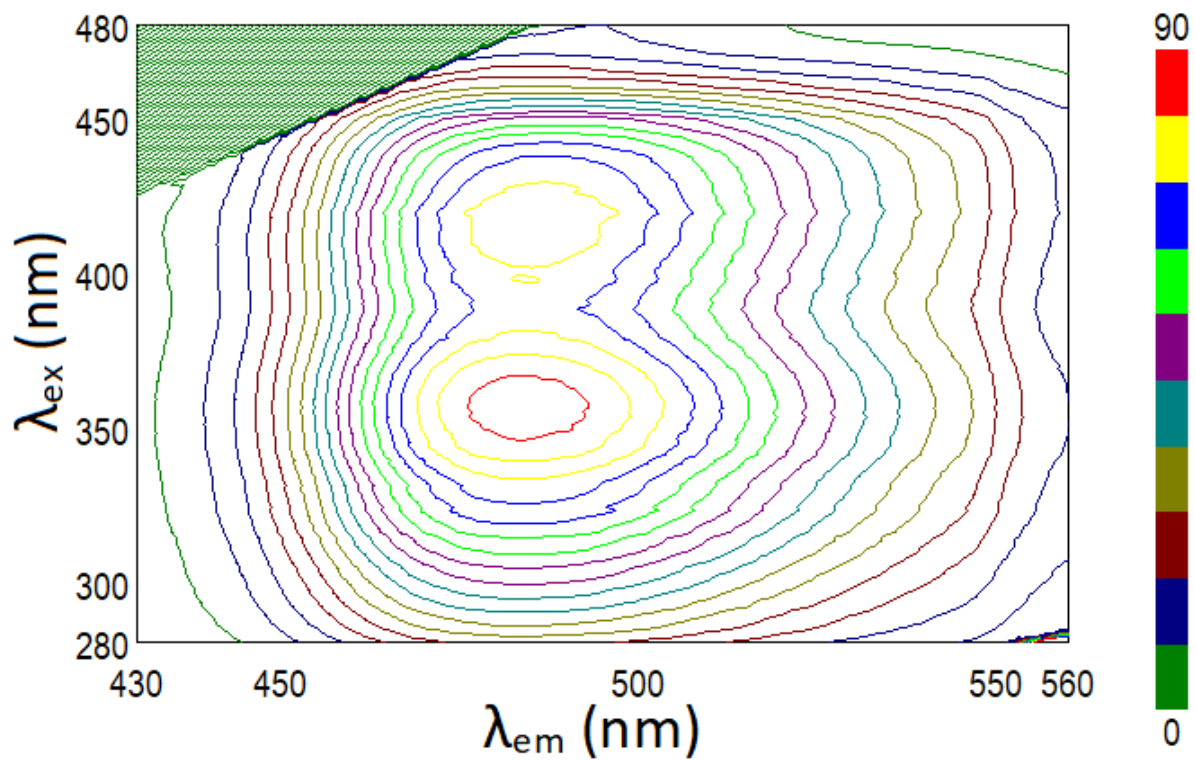

Figure S84. 3D-EEM fluorescence spectrum of CdBr

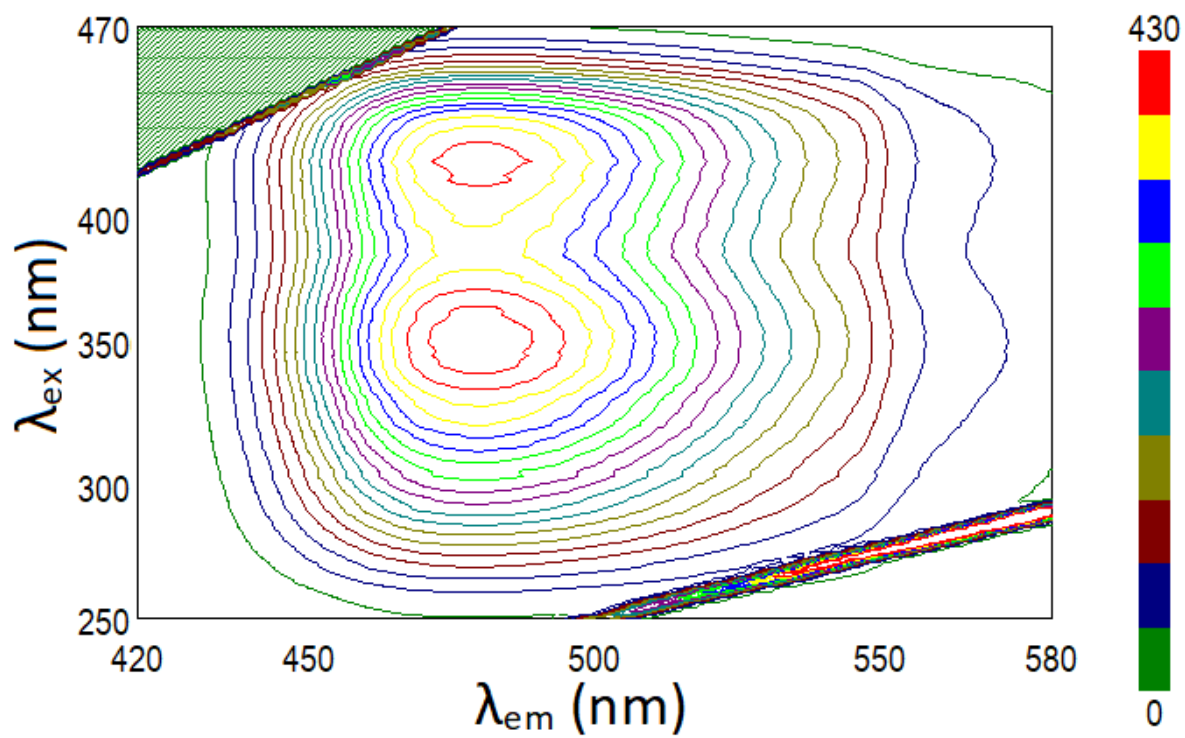

Figure S85. 3D-EEM fluorescence spectrum of HgCl(1)

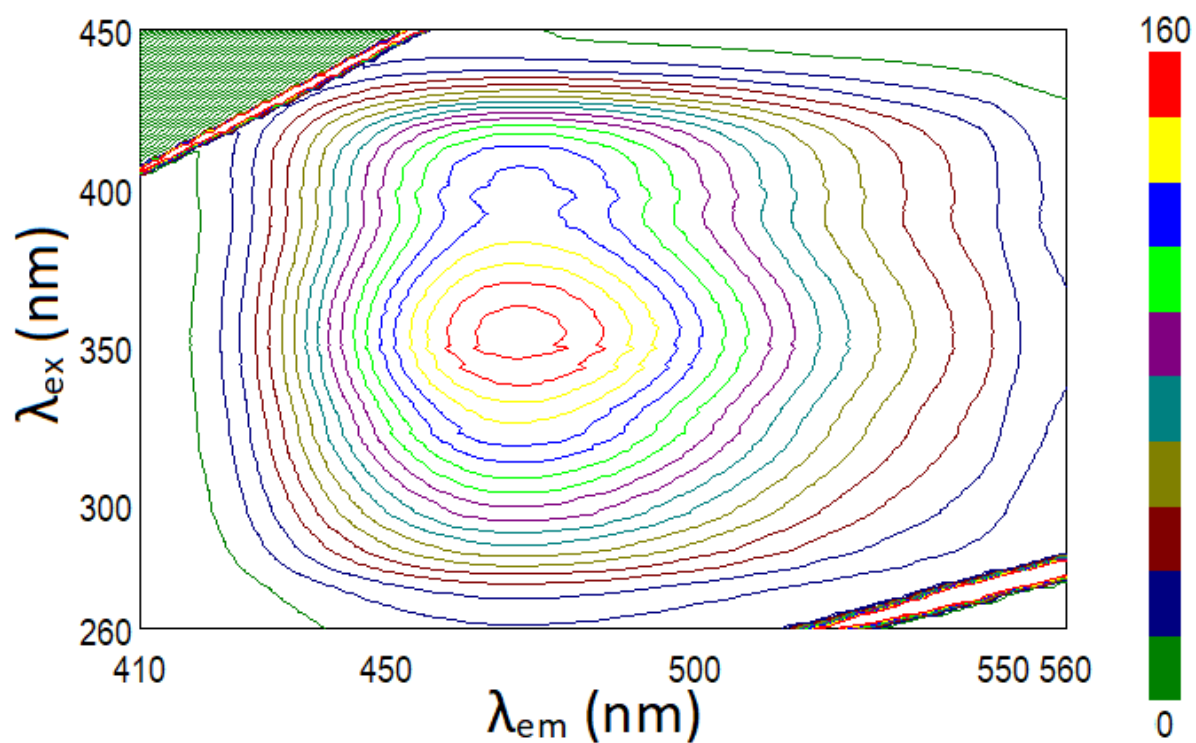

Figure S86. 3D-EEM fluorescence spectrum of HgCl(2)

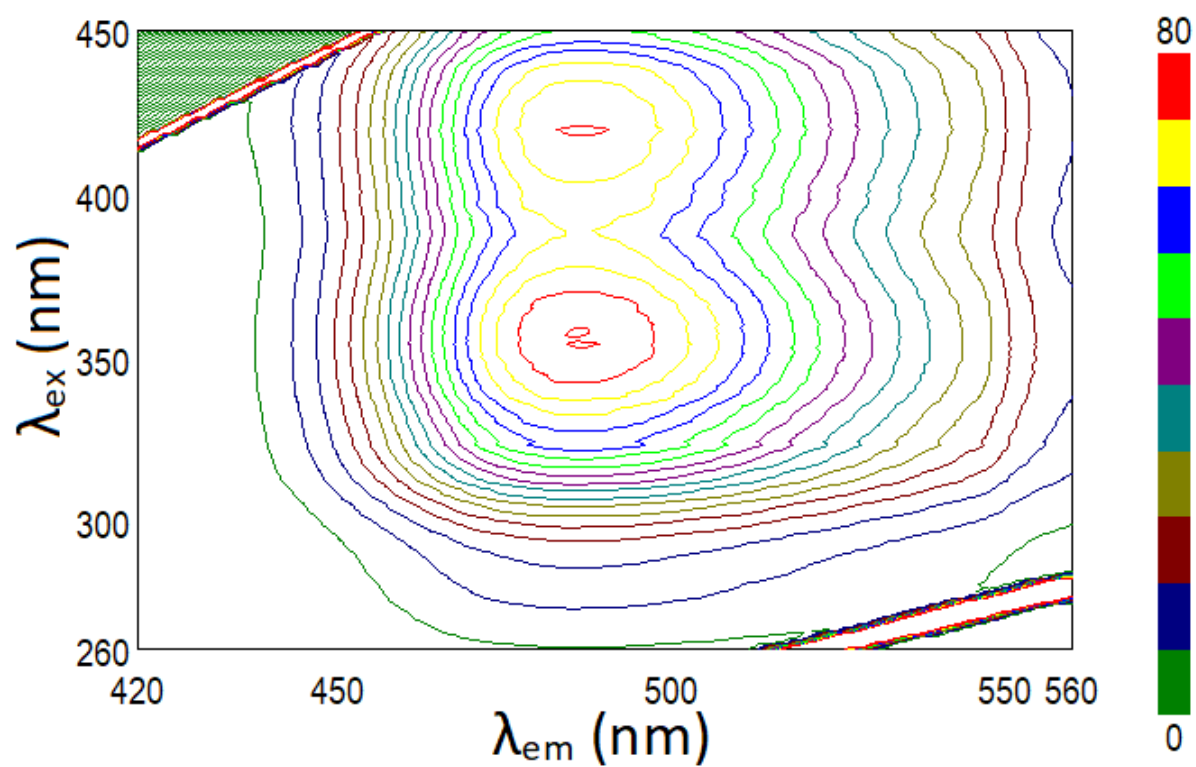

Figure S87. 3D-EEM fluorescence spectrum of HgBr

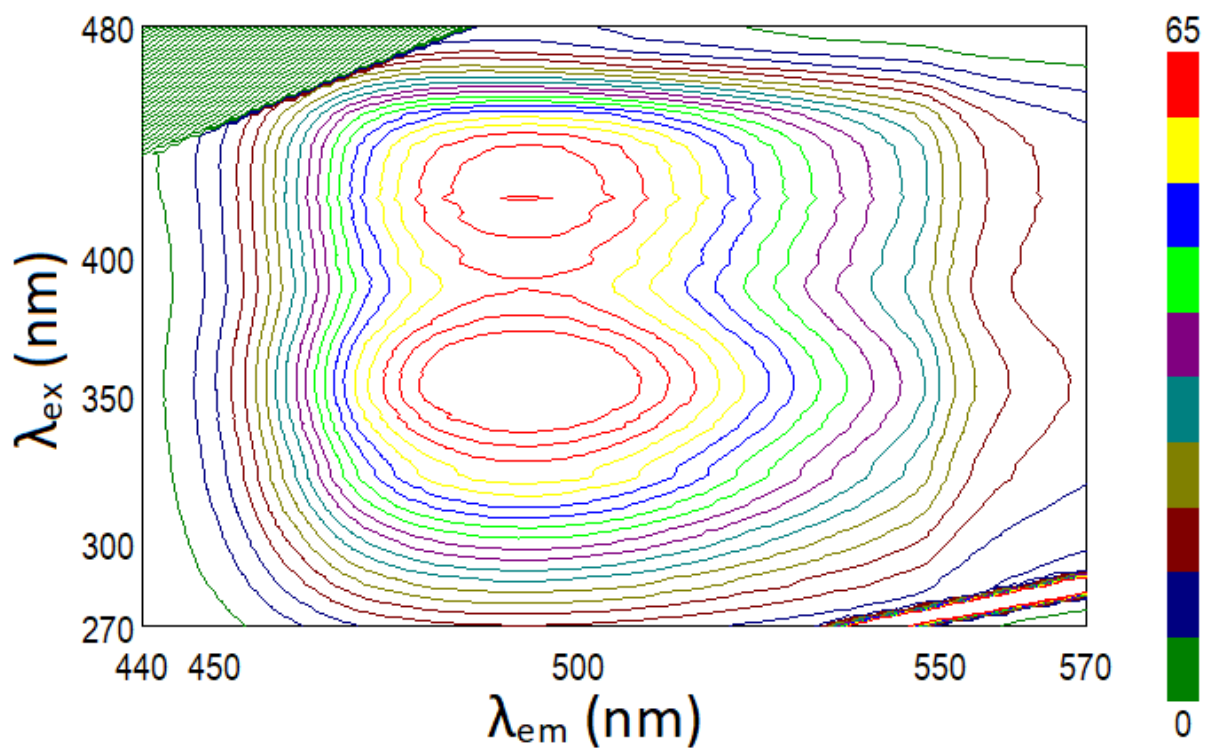

Figure S88. 3D-EEM fluorescence spectrum of SnCl(1)

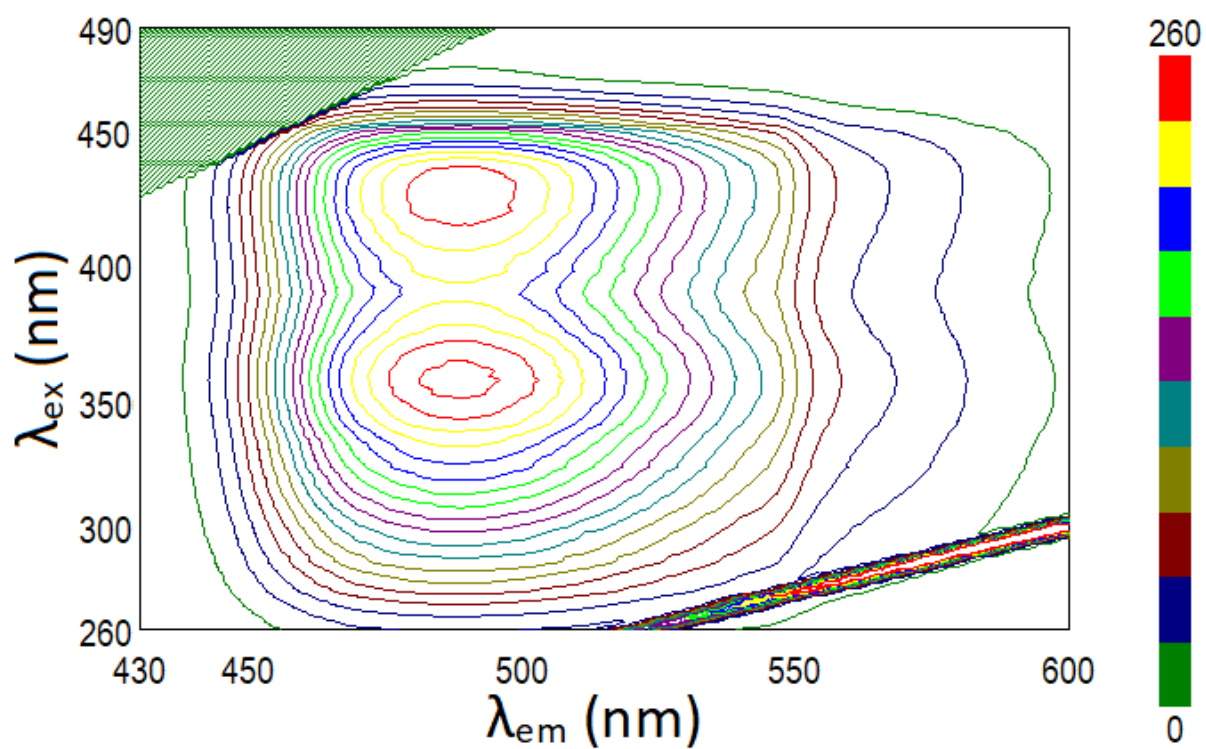

Figure S89. 3D-EEM fluorescence spectrum of SnCl(2)

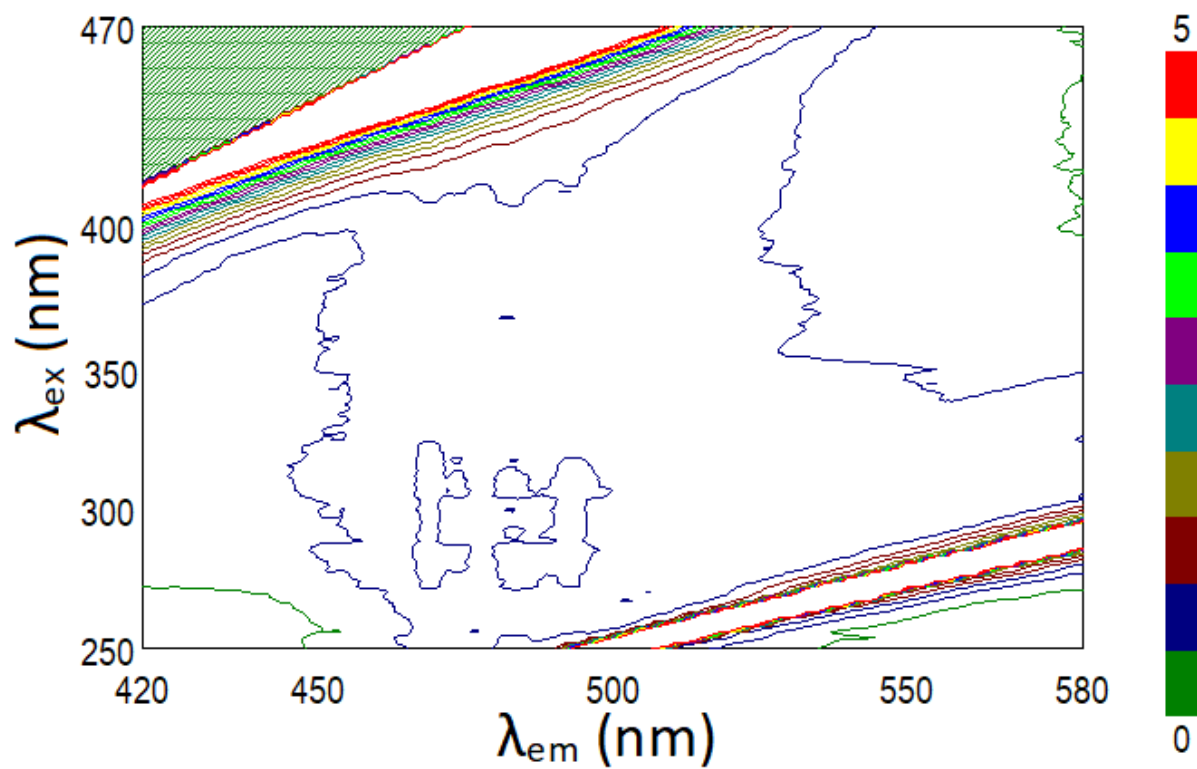

Figure S90. 3D-EEM fluorescence spectrum of SnBr

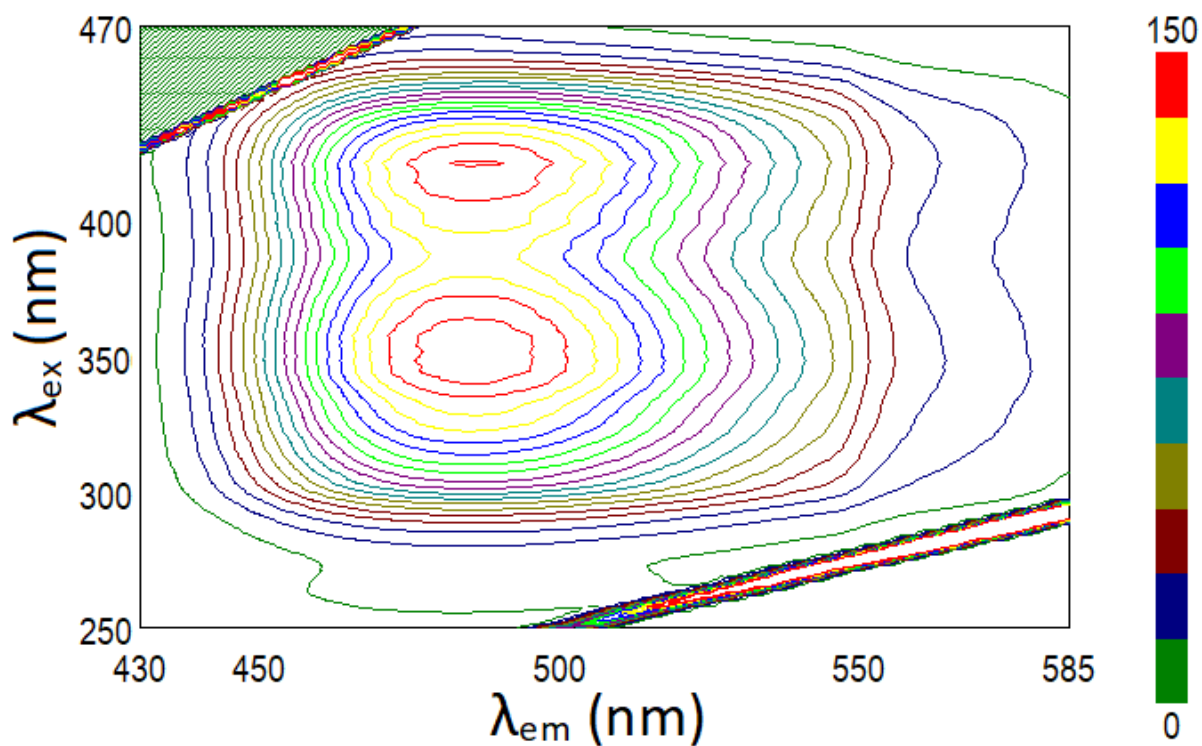

Figure S91. 3D-EEM fluorescence spectrum of PbCl

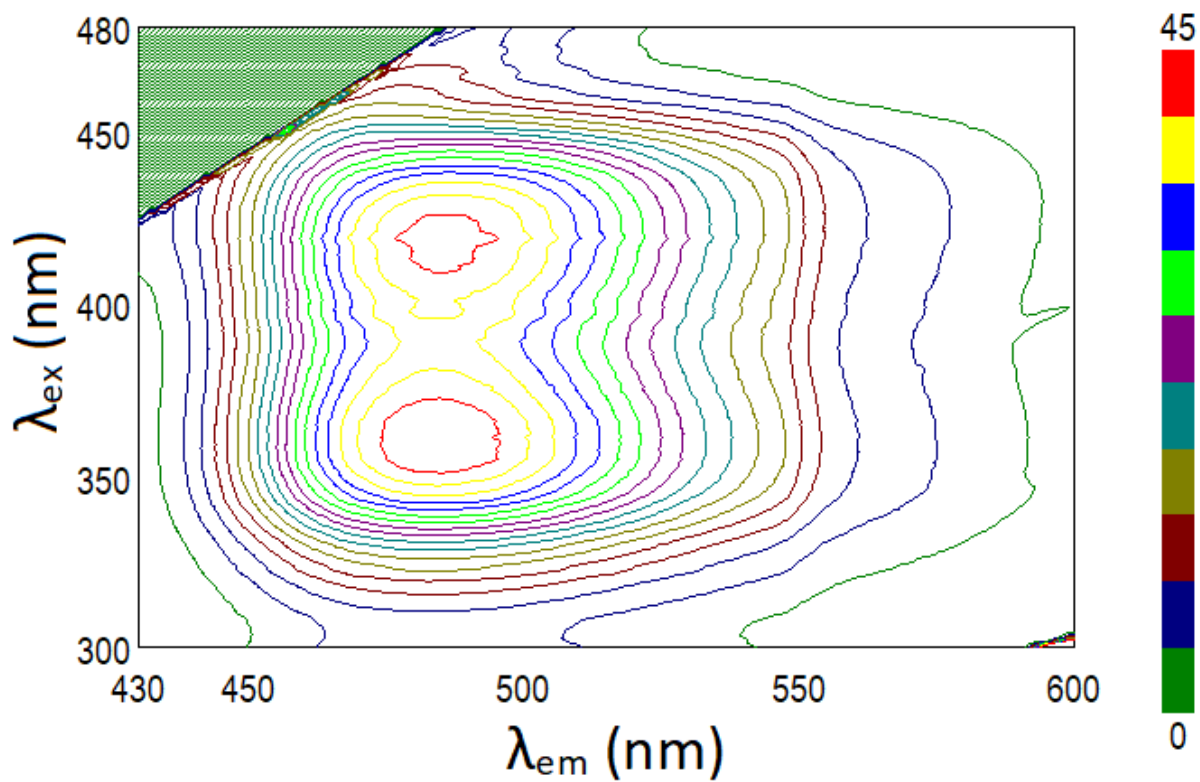

Figure S92. 3D-EEM fluorescence spectrum of PbBr

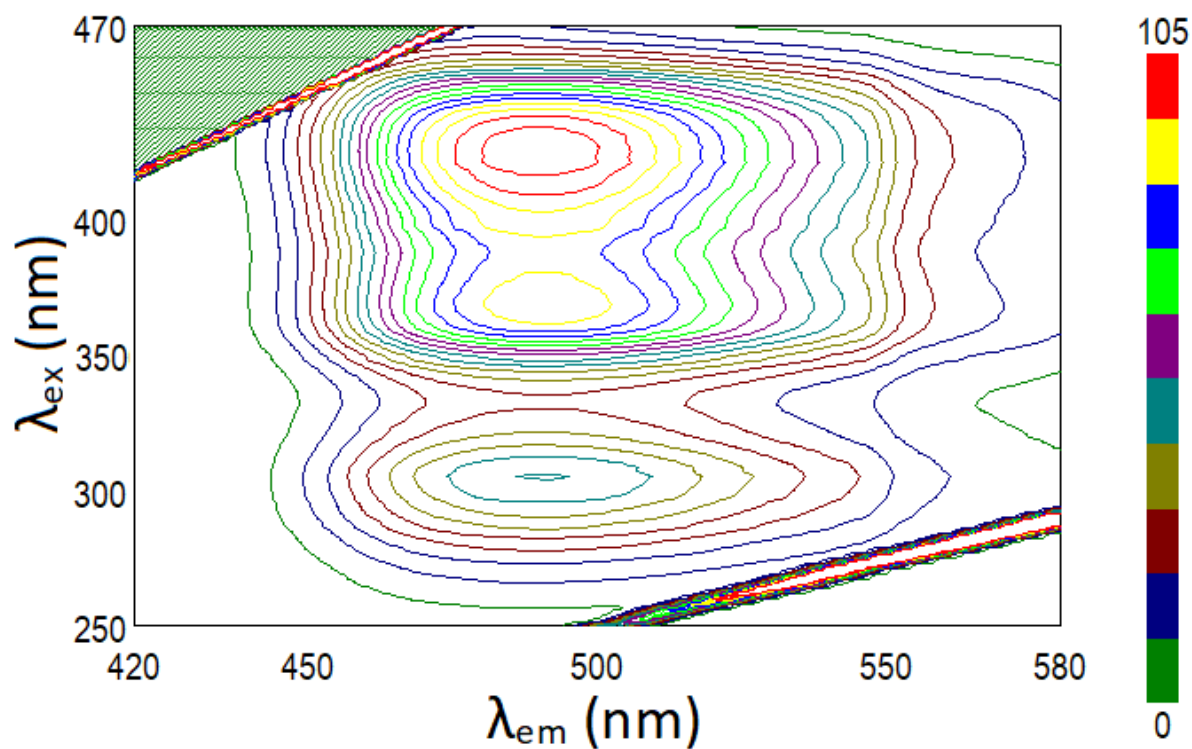

Figure S93. 3D-EEM fluorescence spectrum of BiCl



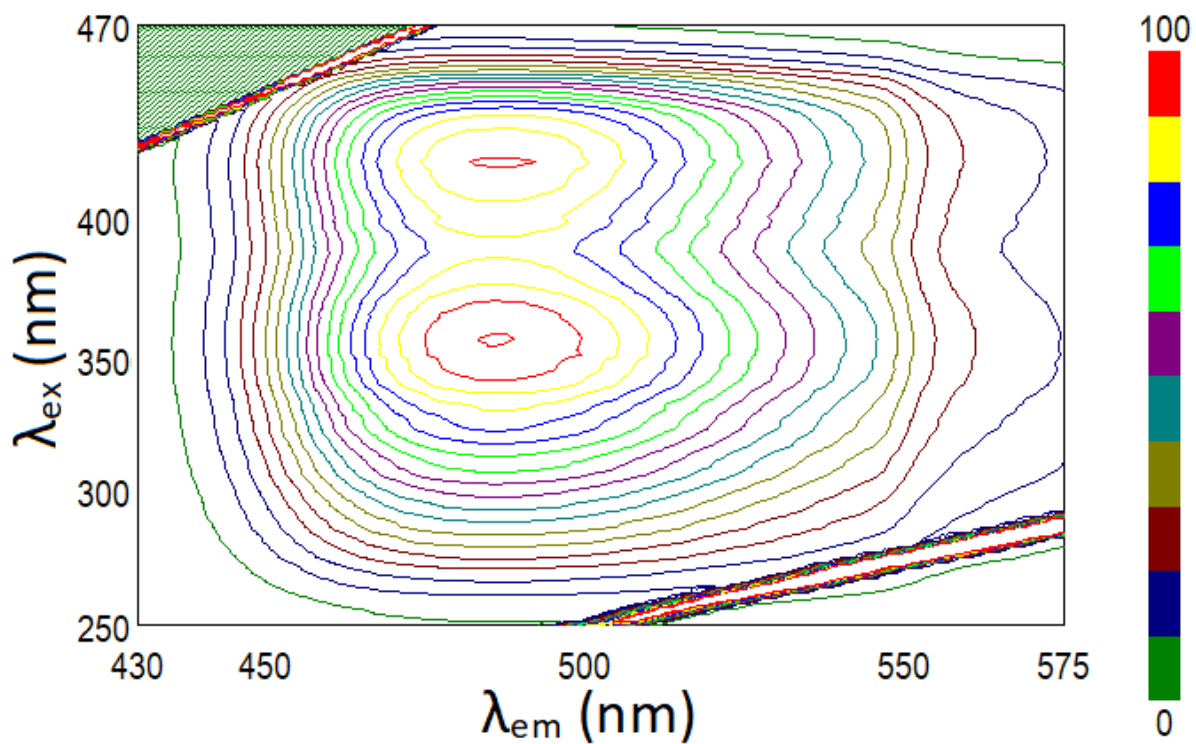

Figure S94. 3D-EEM fluorescence spectrum of 8hqHCl

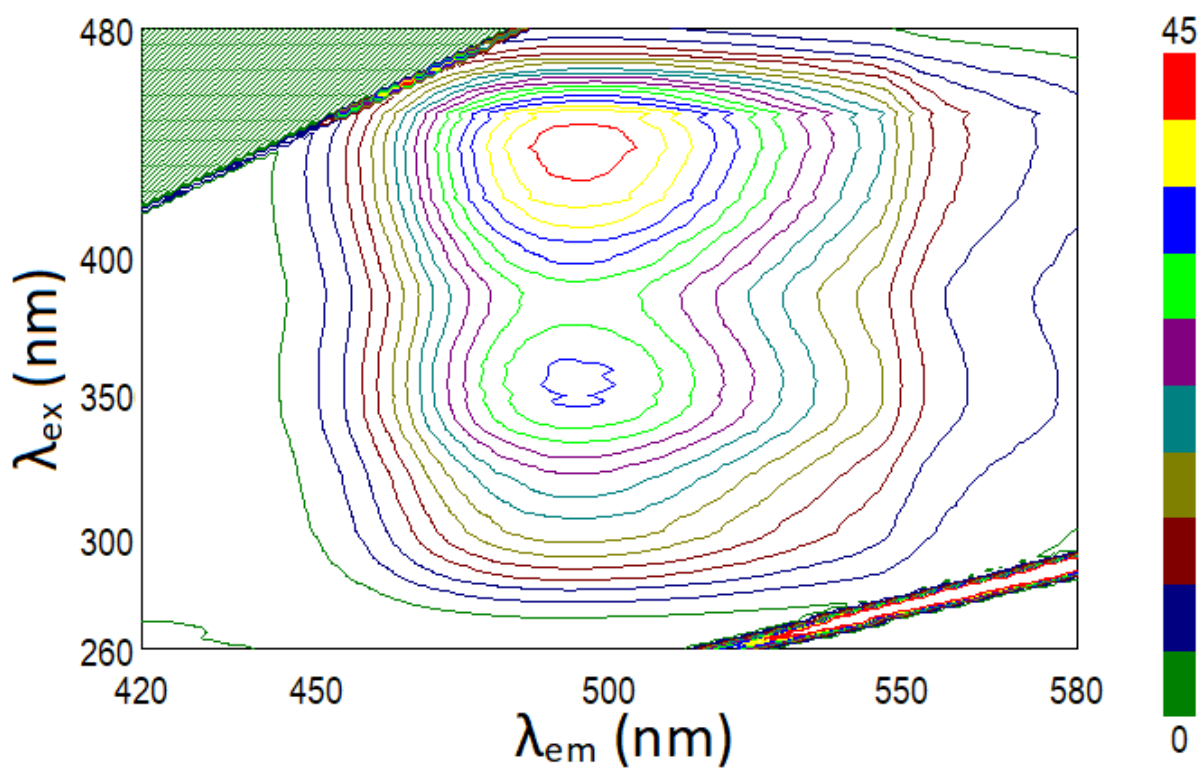

Figure S95. 3D-EEM fluorescence spectrum of 8hqHBr

#### 4. The data concerning the structures of $(8\text{hqBr}_2\text{H})_2[\text{CuBr}_4]\cdot 2\text{H}_2\text{O}$ and $(8\text{hqBr}_2\text{H})_4[\text{Bi}_2\text{Br}_{10}]\cdot 2\text{H}_2\text{O}$

Molecular structure of  $(8\text{hqBr}_2\text{H})_2[\text{CuBr}_4]\cdot 2\text{H}_2\text{O}$ . The equivalent atoms were generated according to symmetry transformations: (i)  $-x, y, -z+1.5$ .

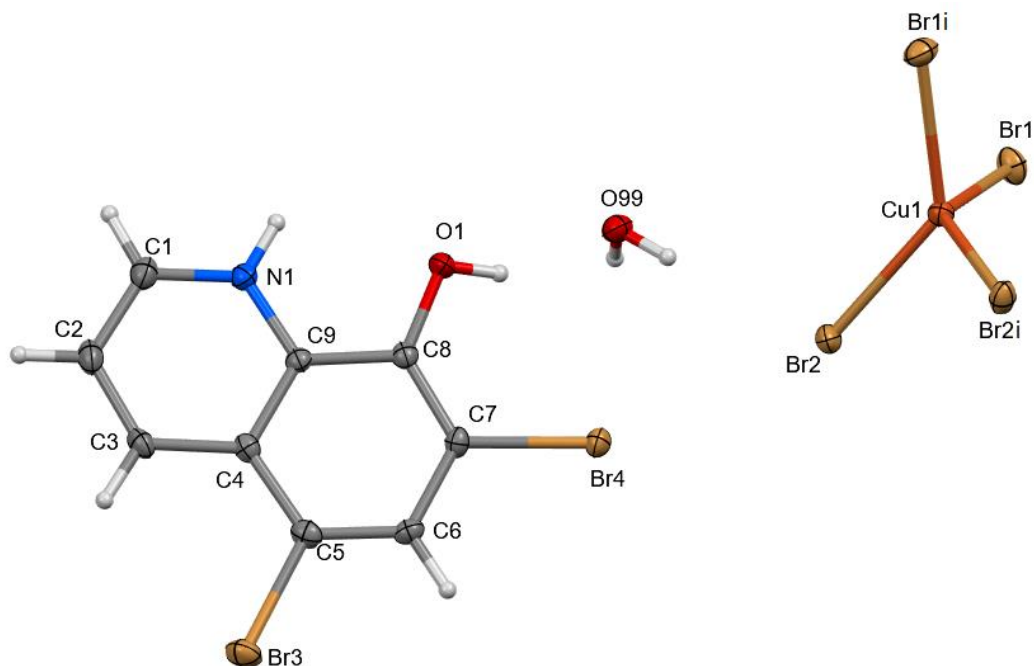

Molecular structure of  $(8\text{hqBr}_2\text{H})_4[\text{Bi}_2\text{Br}_{10}]\cdot 2\text{H}_2\text{O}$ . The equivalent atoms were generated according to symmetry transformation (i)  $-x+1, -y+1, -z+2$ .

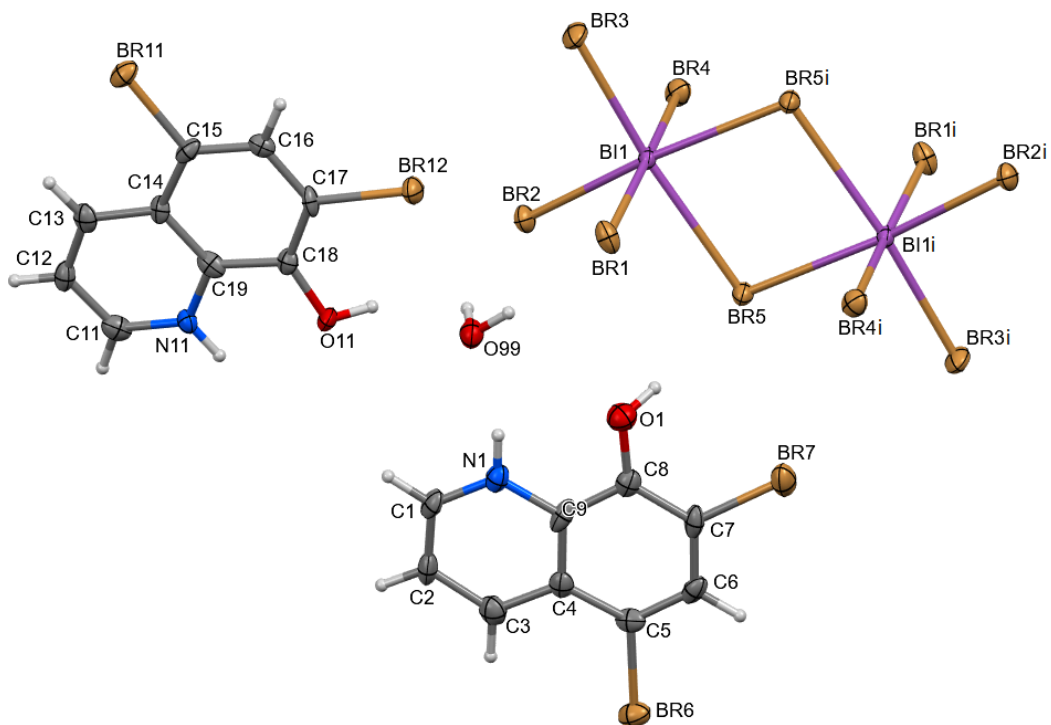



## Crystal data and structure refinement details

| Compound                                                     | (8hqBr <sub>2</sub> H) <sub>2</sub> [CuBr <sub>4</sub> ]·2H <sub>2</sub> O       | (8hqBr <sub>2</sub> H) <sub>4</sub> [Bi <sub>2</sub> Br <sub>10</sub> ]·2H <sub>2</sub> O |
|--------------------------------------------------------------|----------------------------------------------------------------------------------|-------------------------------------------------------------------------------------------|
| Empirical formula                                            | C <sub>18</sub> H <sub>16</sub> Br <sub>8</sub> N <sub>2</sub> O <sub>4</sub> Cu | C <sub>18</sub> H <sub>14</sub> BiBr <sub>9</sub> N <sub>2</sub> O <sub>3</sub>           |
| Formula weight                                               | 1027.15                                                                          | 1234.48                                                                                   |
| Crystal system                                               | Monoclinic                                                                       | Triclinic                                                                                 |
| Space group                                                  | C2/c                                                                             | P-1                                                                                       |
| Radiation                                                    | Mo K $\alpha$ (0.71073 Å)                                                        | Mo K $\alpha$ (0.71073 Å)                                                                 |
| Unit cell dimensions                                         |                                                                                  |                                                                                           |
| <i>a</i> (Å)                                                 | 7.78250(10)                                                                      | 11.5995(7)                                                                                |
| <i>b</i> (Å)                                                 | 18.1498(3)                                                                       | 11.6721(5)                                                                                |
| <i>c</i> (Å)                                                 | 19.2961(3)                                                                       | 12.3329(6)                                                                                |
| $\alpha$ (°)                                                 | 90.00                                                                            | 68.963(4)                                                                                 |
| $\beta$ (°)                                                  | 99.250(2)                                                                        | 63.154(5)                                                                                 |
| $\gamma$ (°)                                                 | 90.00                                                                            | 76.750(4)                                                                                 |
| Volume (Å <sup>3</sup> )                                     | 2690.15(7)                                                                       | 1385.98(14)                                                                               |
| <i>Z</i>                                                     | 4                                                                                | 2                                                                                         |
| Calculated density (Mg/m <sup>3</sup> )                      | 2.536                                                                            | 2.958                                                                                     |
| Absorption coefficient (mm <sup>-1</sup> )                   | 12.723                                                                           | 19.358                                                                                    |
| <i>F</i> (000)                                               | 1916                                                                             | 1116.0                                                                                    |
| Min. and max. transmission                                   | 0.109 to 0.327                                                                   | 0.174 and 1.000                                                                           |
| $\theta$ Range for data collection (°)                       | 5.76 to 63.16                                                                    | 6.134 to 50.052                                                                           |
| Index ranges                                                 | -11 ≤ <i>h</i> ≤ 10<br>-26 ≤ <i>k</i> ≤ 26<br>-23 ≤ <i>l</i> ≤ 27                | -13 ≤ <i>h</i> ≤ 13<br>-13 ≤ <i>k</i> ≤ 13<br>-14 ≤ <i>l</i> ≤ 14                         |
| Reflections collected / unique                               | 44926 / 4192                                                                     | 27907 / 4877                                                                              |
| <i>R</i> <sub>int</sub>                                      | 0.0506                                                                           | 0.1006                                                                                    |
| Completeness (%)                                             | 99.9                                                                             | 99.8                                                                                      |
| Data / restraints / parameters                               | 4192 / 0 / 151                                                                   | 4877 / 0 / 303                                                                            |
| Goodness-of-fit on <i>F</i> <sup>2</sup>                     | 1.083                                                                            | 0.998                                                                                     |
| Final <i>R</i> indices [ <i>I</i> > 2 $\sigma$ ( <i>I</i> )] | <i>R</i> 1 = 0.0320<br><i>wR</i> 2 = 0.0692                                      | <i>R</i> 1 = 0.0382<br><i>wR</i> 2 = 0.0994                                               |
| <i>R</i> indices (all data)                                  | <i>R</i> 1 = 0.0403,<br><i>wR</i> 2 = 0.0720                                     | <i>R</i> 1 = 0.0457<br><i>wR</i> 2 = 0.1029                                               |
| Largest diff. peak and hole (e·Å <sup>-3</sup> )             | 1.14 and -0.72                                                                   | 3.06 and -2.09                                                                            |

## Structural data of the coordination polyhedra

| <i>i</i> — <i>j</i>                                                                       | <i>d</i> <sub><i>ij</i></sub> [Å] | <i>i</i> — <i>j</i> — <i>k</i> | <i>a</i> <sub><i>ijk</i></sub> [°] | <i>i</i> — <i>j</i> — <i>k</i>         | <i>a</i> <sub><i>ijk</i></sub> [°] |
|-------------------------------------------------------------------------------------------|-----------------------------------|--------------------------------|------------------------------------|----------------------------------------|------------------------------------|
| (8hqBr <sub>2</sub> H) <sub>2</sub> [CuBr <sub>4</sub> ]·2H <sub>2</sub> O                |                                   |                                |                                    |                                        |                                    |
| Cu1—Br1                                                                                   | 2.3685(5)                         | Br1—Fe1—Br2                    | 97.387(12)                         | Br2—Fe1—Br1 <sup>i</sup>               | 134.770(12)                        |
| Cu1—Br2                                                                                   | 2.3930(5)                         | Br1—Fe1—Br1 <sup>i</sup>       | 99.26(3)                           | Br2—Fe1—Br2 <sup>i</sup>               | 99.98(3)                           |
|                                                                                           |                                   | Br1—Fe1—Br2 <sup>i</sup>       | 134.766(12)                        | Br1 <sup>i</sup> —Fe1—Br2 <sup>i</sup> | 97.388(12)                         |
| (8hqBr <sub>2</sub> H) <sub>4</sub> [Bi <sub>2</sub> Br <sub>10</sub> ]·2H <sub>2</sub> O |                                   |                                |                                    |                                        |                                    |
| Bi1—Br1                                                                                   | 2.8830(8)                         | Br1—Bi1—Br2                    | 89.21(2)                           | Br2—Bi1—Br5 <sup>i</sup>               | 174.19(2)                          |
| Bi1—Br2                                                                                   | 2.7622(8)                         | Br1—Bi1—Br3                    | 91.82(3)                           | Br3—Bi1—Br4                            | 91.11(3)                           |
| Bi1—Br3                                                                                   | 2.7001(8)                         | Br1—Bi1—Br4                    | 173.98(2)                          | Br3—Bi1—Br5                            | 172.98(2)                          |
| Bi1—Br4                                                                                   | 2.8505(8)                         | Br1—Bi1—Br5                    | 85.80(2)                           | Br3—Bi1—Br5 <sup>i</sup>               | 90.84(2)                           |
| Bi1—Br5                                                                                   | 3.0634(8)                         | Br1—Bi1—Br5 <sup>i</sup>       | 93.19(2)                           | Br4—Bi1—Br5                            | 91.87(2)                           |
| Bi1—Br5 <sup>ii</sup>                                                                     | 3.0041(8)                         | Br2—Bi1—Br3                    | 94.37(3)                           | Br4—Bi1—Br5 <sup>i</sup>               | 92.01(2)                           |
|                                                                                           |                                   | Br2—Bi1—Br4                    | 85.33(3)                           | Br5—Bi1—Br5 <sup>i</sup>               | 82.70(2)                           |
|                                                                                           |                                   | Br2—Bi1—Br5                    | 92.21(2)                           |                                        |                                    |

 Symmetry transformations used to generate equivalent atoms: (i) -*x*, *y*, -*z*+1.5; (ii) -*x*+1, -*y*+1, -*z*+2.

Stacking interactions in the studied compounds. Each ring is indicated by one atom, which belongs solely to this ring. The  $\alpha$  is a dihedral angle between planes I and J,  $\beta$  is an angle between Cg(I)-Cg(J) vector and normal to plane I,  $d_p$  is a perpendicular distance of Cg(I) on ring J plane.

| R(I)•••R(J)                                                                            | d(Cg•••Cg) [Å] | $\alpha$ [°] | $\beta$ [°] | $d_p$ [Å]  |
|----------------------------------------------------------------------------------------|----------------|--------------|-------------|------------|
| <b>(8hqBr<sub>2</sub>H)<sub>2</sub>[CuBr<sub>4</sub>]·2H<sub>2</sub>O</b>              |                |              |             |            |
| N1•••C8 <sup>i</sup>                                                                   | 3.7008(18)     | 2.16(15)     | 24.7        | 3.3025(12) |
| C8•••C8 <sup>i</sup>                                                                   | 3.5728(18)     | 0.03(15)     | 20.6        | 3.3437(13) |
| C8•••C8 <sup>ii</sup>                                                                  | 4.3531(18)     | 0.03(15)     | 38.6        | 3.4001(13) |
| <b>(8hqBr<sub>2</sub>H)<sub>4</sub>[Bi<sub>2</sub>Br<sub>10</sub>]·2H<sub>2</sub>O</b> |                |              |             |            |
| C8•••C18 <sup>iii</sup>                                                                | 3.670(5)       | 3.9(4)       | 22.7        | 3.354(4)   |
| C18•••C18 <sup>iv</sup>                                                                | 3.739(5)       | 0.0(4)       | 26.5        | 3.346(4)   |

Symmetry transformations used to generate equivalent atoms: (i) -x+1.5, -y+0.5, -z+1; (ii) -x+0.5, -y+0.5, -z+1 (iii) x, y+1, z; (iv) -z+1, -y, -z+1.

#### Hydrogen bonds in the studied compounds

| D-H•••A                                                                                | d(D—H) [Å] | d(H•••A) [Å] | d(D•••A) [Å] | $\angle$ (DHA) [°] | G <sub>d</sub> <sup>a</sup> (n) |
|----------------------------------------------------------------------------------------|------------|--------------|--------------|--------------------|---------------------------------|
| <b>(8hqBr<sub>2</sub>H)<sub>2</sub>[CuBr<sub>4</sub>]·2H<sub>2</sub>O</b>              |            |              |              |                    |                                 |
| N1—H1N•••O99 <sup>i</sup>                                                              | 0.88       | 1.94         | 2.760(4)     | 155                | D(2)                            |
| O1—H1O•••O99                                                                           | 0.84       | 1.92         | 2.702(3)     | 154                | D(2)                            |
| O99—H99O•••Br1 <sup>ii</sup>                                                           | 0.87       | 2.93         | 3.520(2)     | 127                | D(2)                            |
| O99—H99O•••Br2 <sup>ii</sup>                                                           | 0.87       | 2.66         | 3.443(2)     | 150                | D(2)                            |
| O99—H99P•••Br2                                                                         | 0.87       | 2.49         | 3.349(2)     | 168                | D(2)                            |
| <b>(8hqBr<sub>2</sub>H)<sub>4</sub>[Bi<sub>2</sub>Br<sub>10</sub>]·2H<sub>2</sub>O</b> |            |              |              |                    |                                 |
| N1—H1N•••O99                                                                           | 0.88       | 1.93         | 2.766(10)    | 157                | D(2)                            |
| O1—H1O•••Br5                                                                           | 0.84       | 2.83         | 3.647(7)     | 164                | D(2)                            |
| N11—H11N•••Br4 <sup>i</sup>                                                            | 0.88       | 2.63         | 3.361(7)     | 141                | D(2)                            |
| O11—H11O•••O99                                                                         | 0.84       | 1.90         | 2.659(8)     | 149                | D(2)                            |
| O99—H99O•••Br1                                                                         | 0.87       | 2.41         | 3.273(6)     | 170                | D(2)                            |
| O99—H99P•••Br2                                                                         | 0.87       | 2.53         | 3.295(7)     | 148                | D(2)                            |

Symmetry transformations used to generate equivalent atoms: (i) -x+1, -y+1, -z+1; (ii) -x+1, y, -z+1.5.
